# Supplementary material for: Back to the Future II: Tidal evolution of four supercontinentscenarios
Source: Copernicus journal article supplement (doi:10.5194/esd-2019-61), 2019-10-25
Supplement: Supplementary file 1 [file esd-2019-61-supplement.pdf]

## Contents of this file

Figures S1 – S4

### Introduction

This file contains supporting information for the paper Davies et al., entitled “**Back to the future II: tidal evolution of four supercontinent scenarios**”. Here we provide 20 million-year snapshots of the  $M_2$  global tidal amplitude for the four future supercontinent scenarios presented, each illustrating a different mode of supercontinent formation. See main text for details.

Figures S1a – n: Pangea Ultima is characterized by the closure of the Atlantic.

Figures S2a – k: Novopangea in contrast forms via the closure of the Pacific ocean.

Figures S3a – n: Aurica is formed by closure of both the Atlantic and the Pacific oceans.

Figures S4a – k: Amasia forms by the closure of the Arctic Ocean.

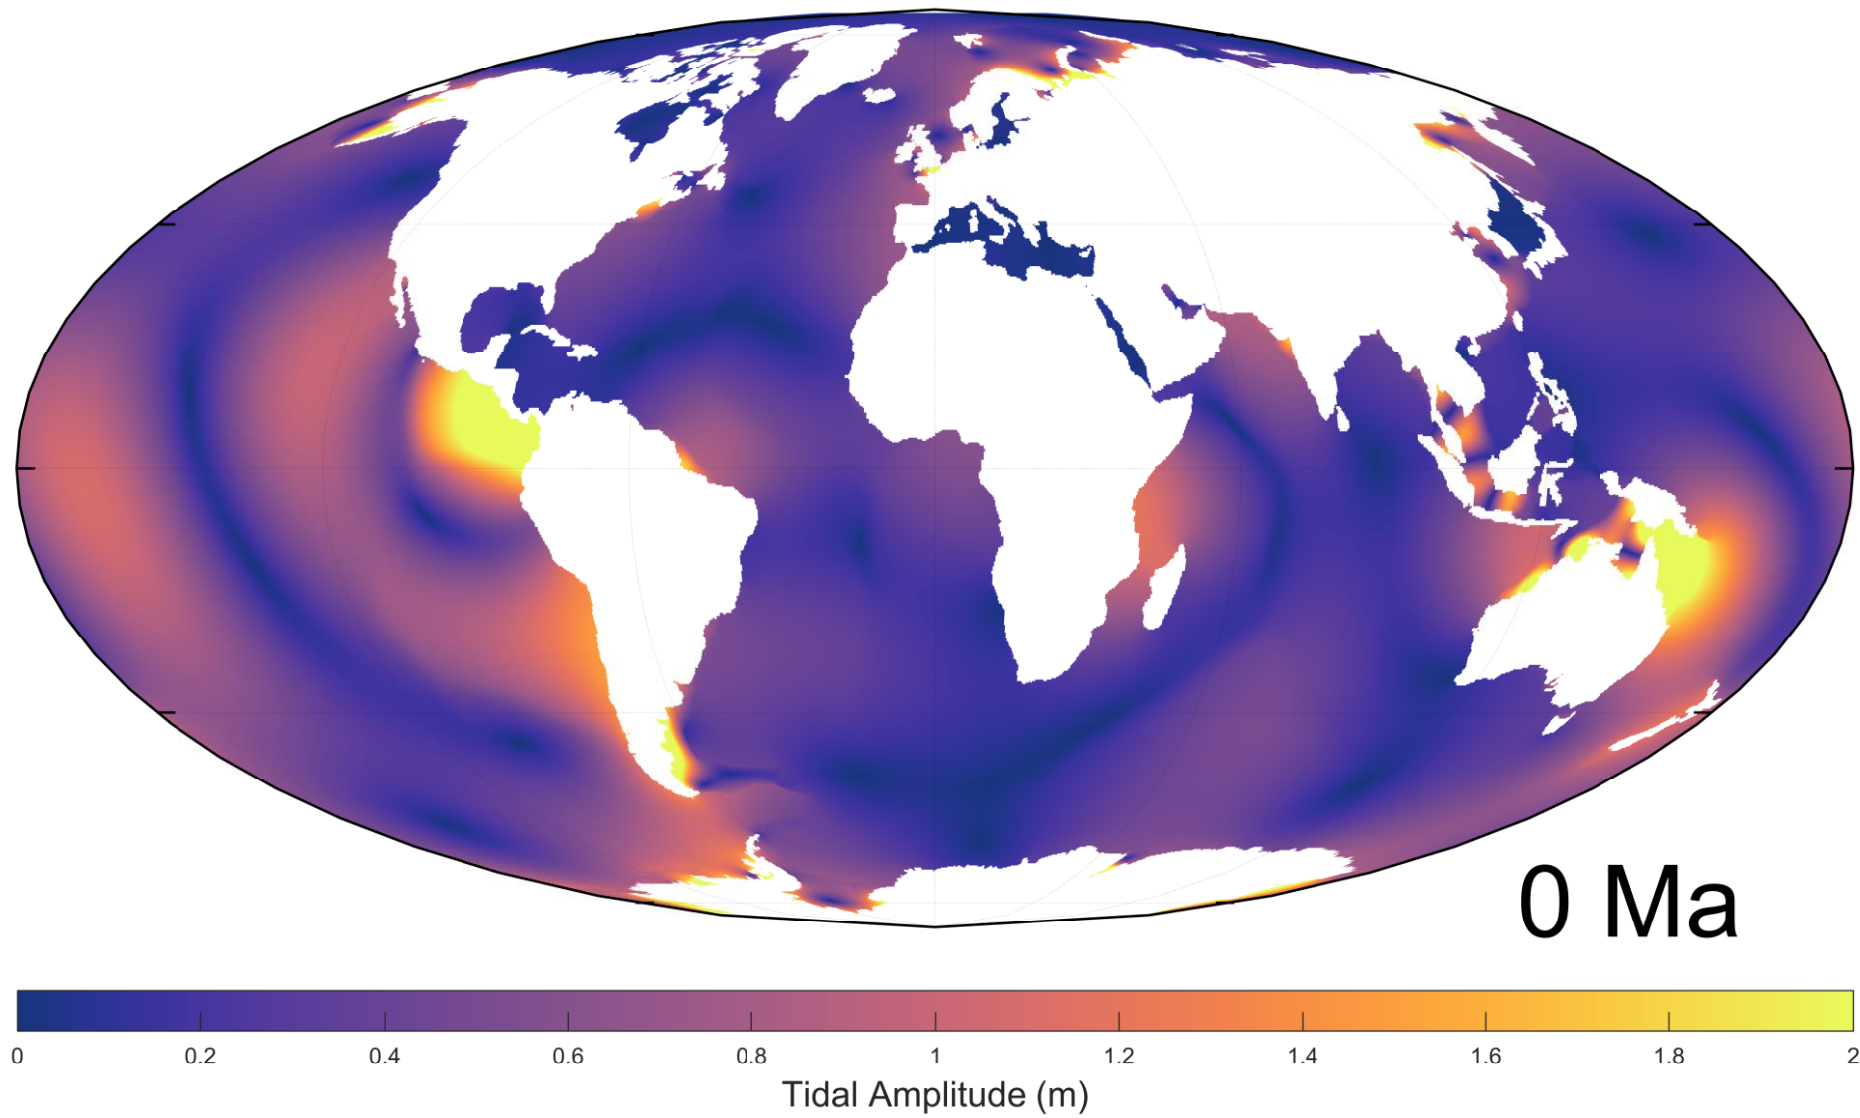

**Figure S1a: Global  $M_2$  amplitudes for the present day (0 Ma) of the Pangea Ultima scenario. The colour scale saturates at 2 m.**

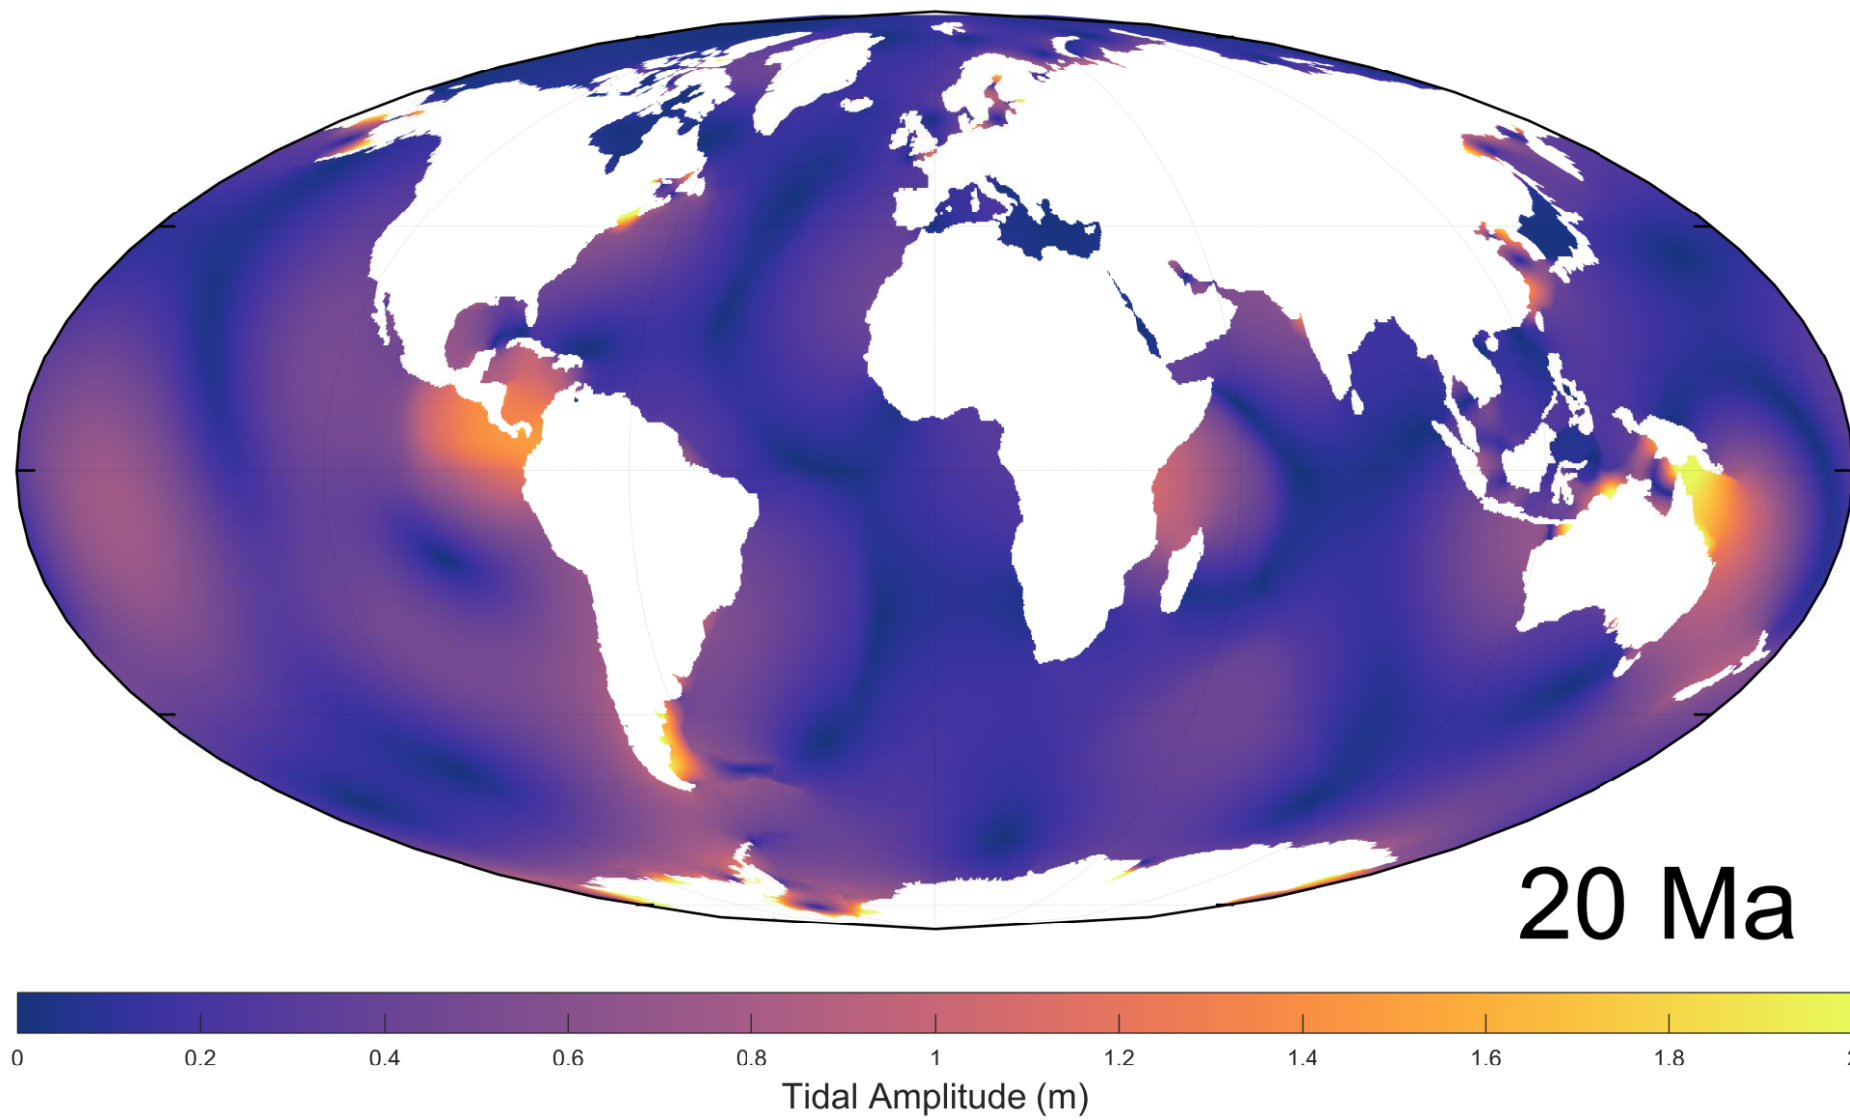

**Figure S1b: Global M<sub>2</sub> tide during the Pangea Ultima scenario continued.**

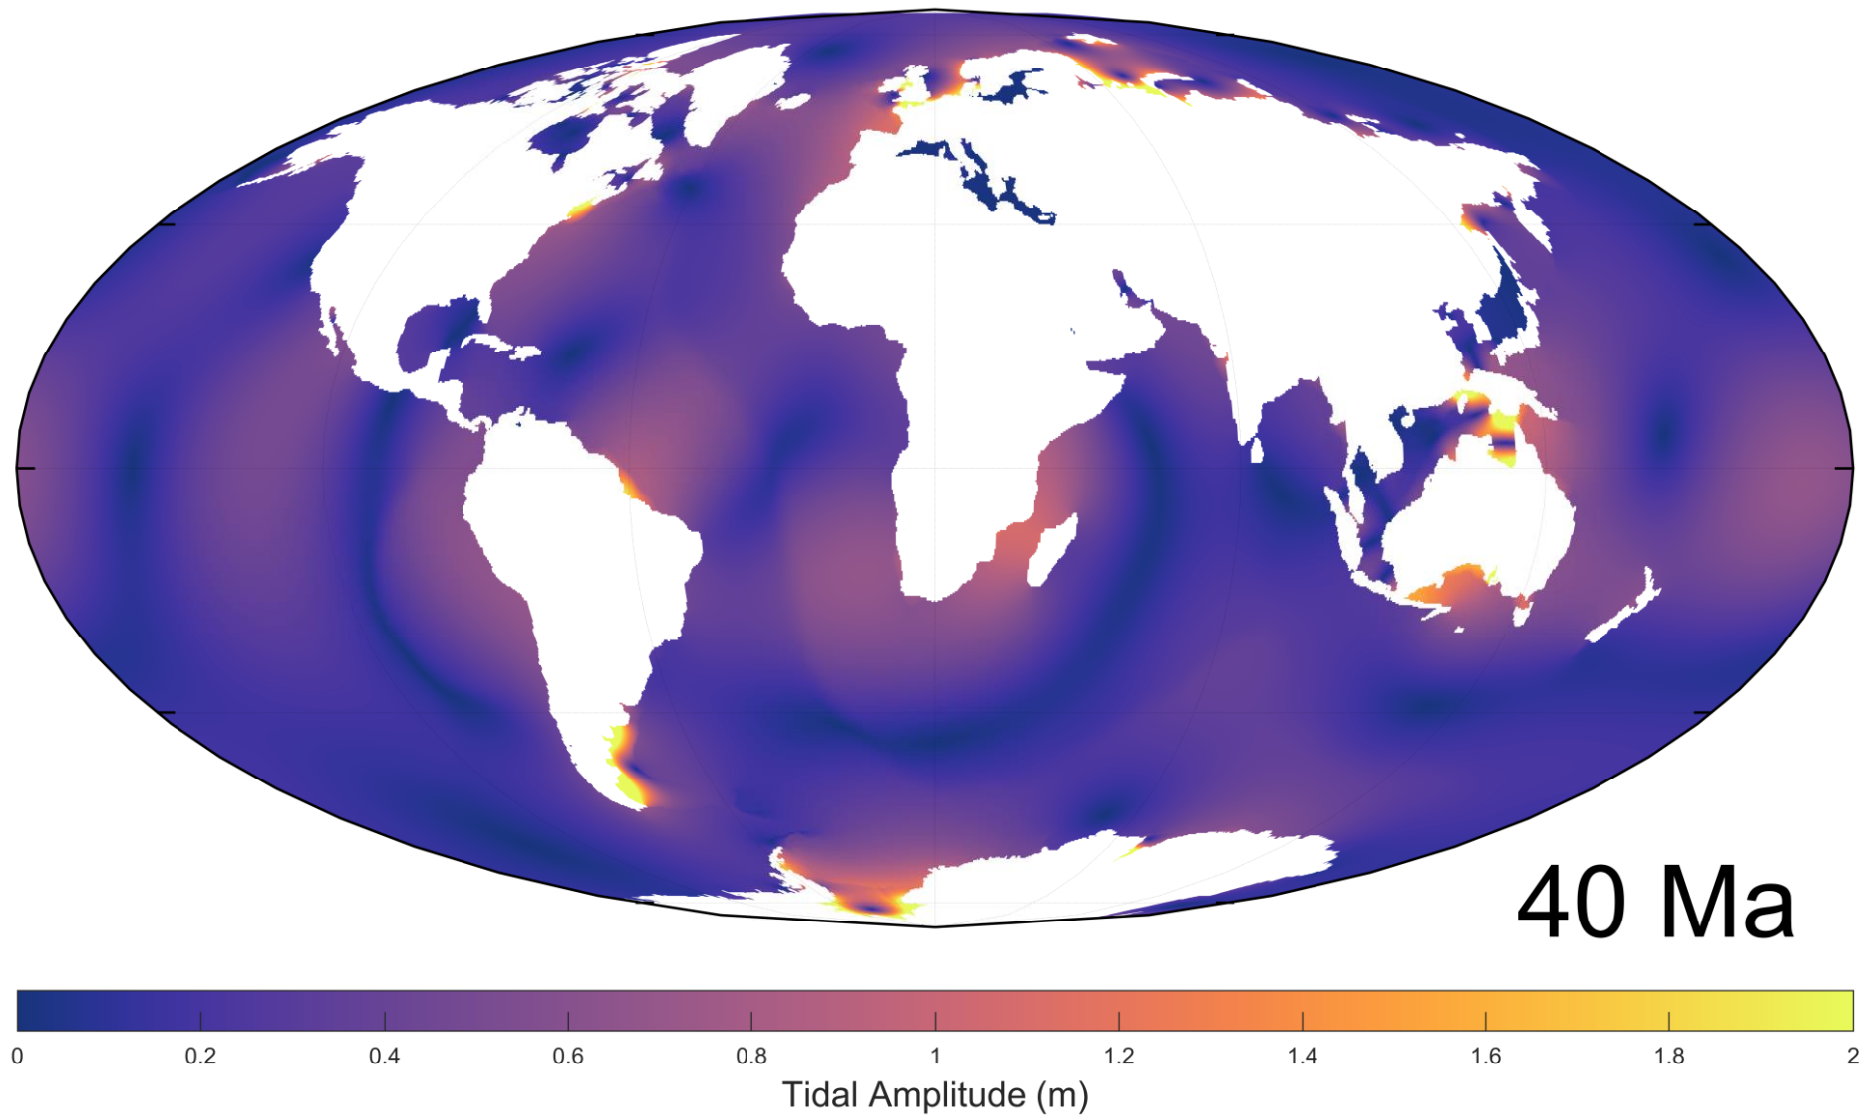

**Figure S1c: Global M<sub>2</sub> tide during the Pangea Ultima scenario continued.**

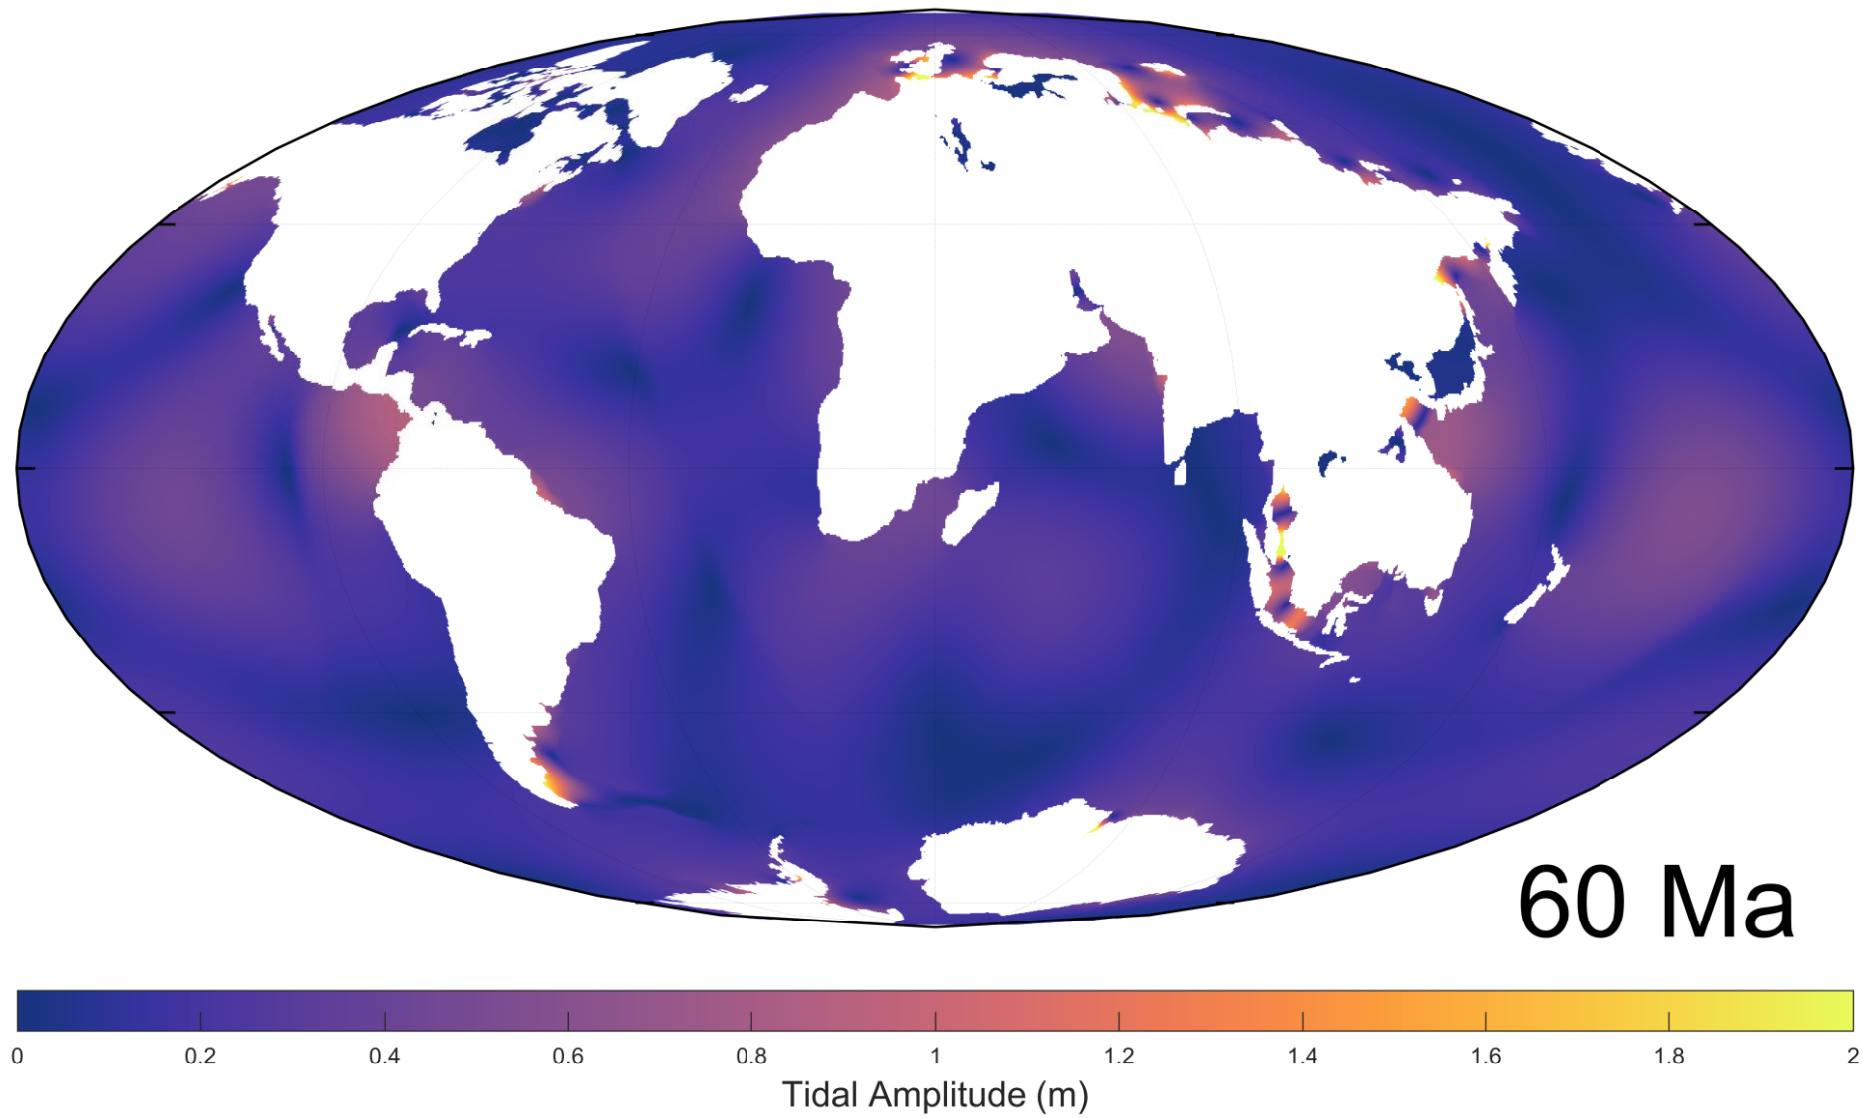

**Figure S1d: Global M<sub>2</sub> tide during the Pangea Ultima scenario continued.**

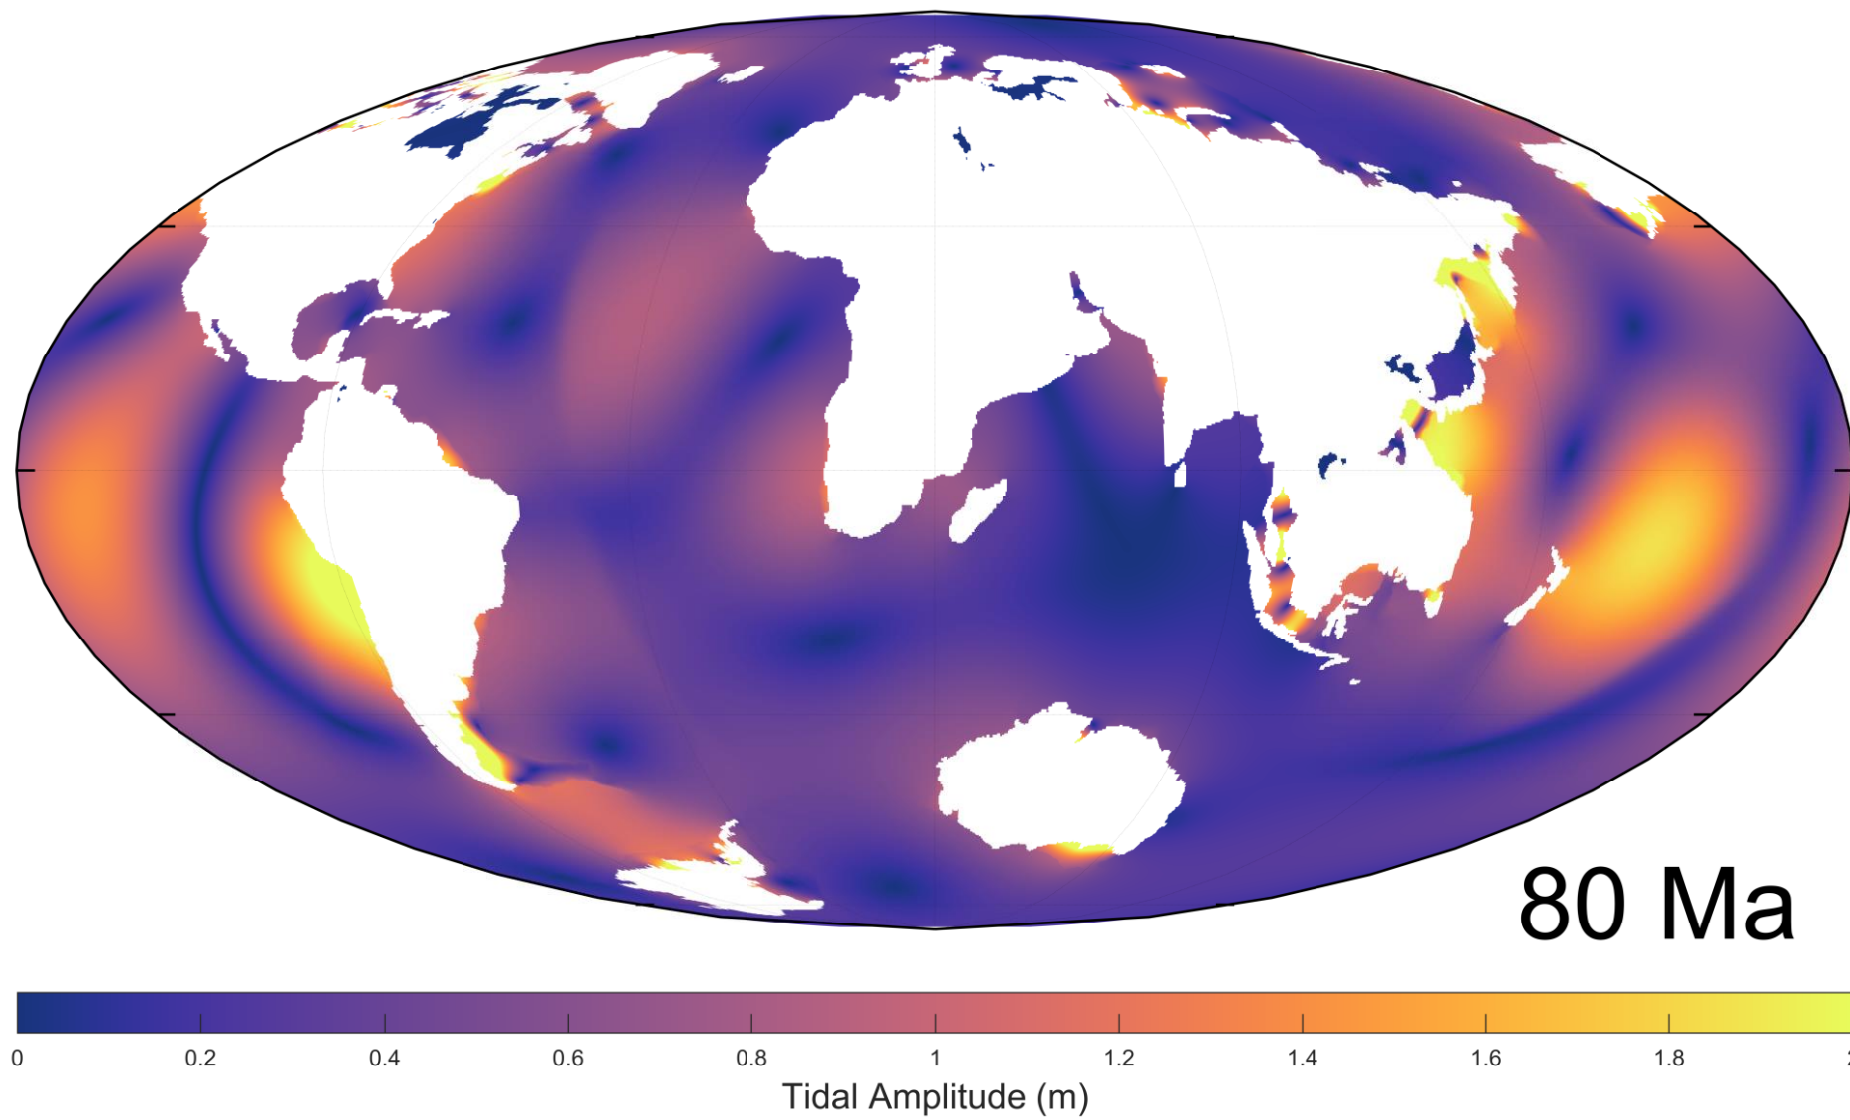

**Figure S1e: Global M<sub>2</sub> tide during the Pangea Ultima scenario continued.**

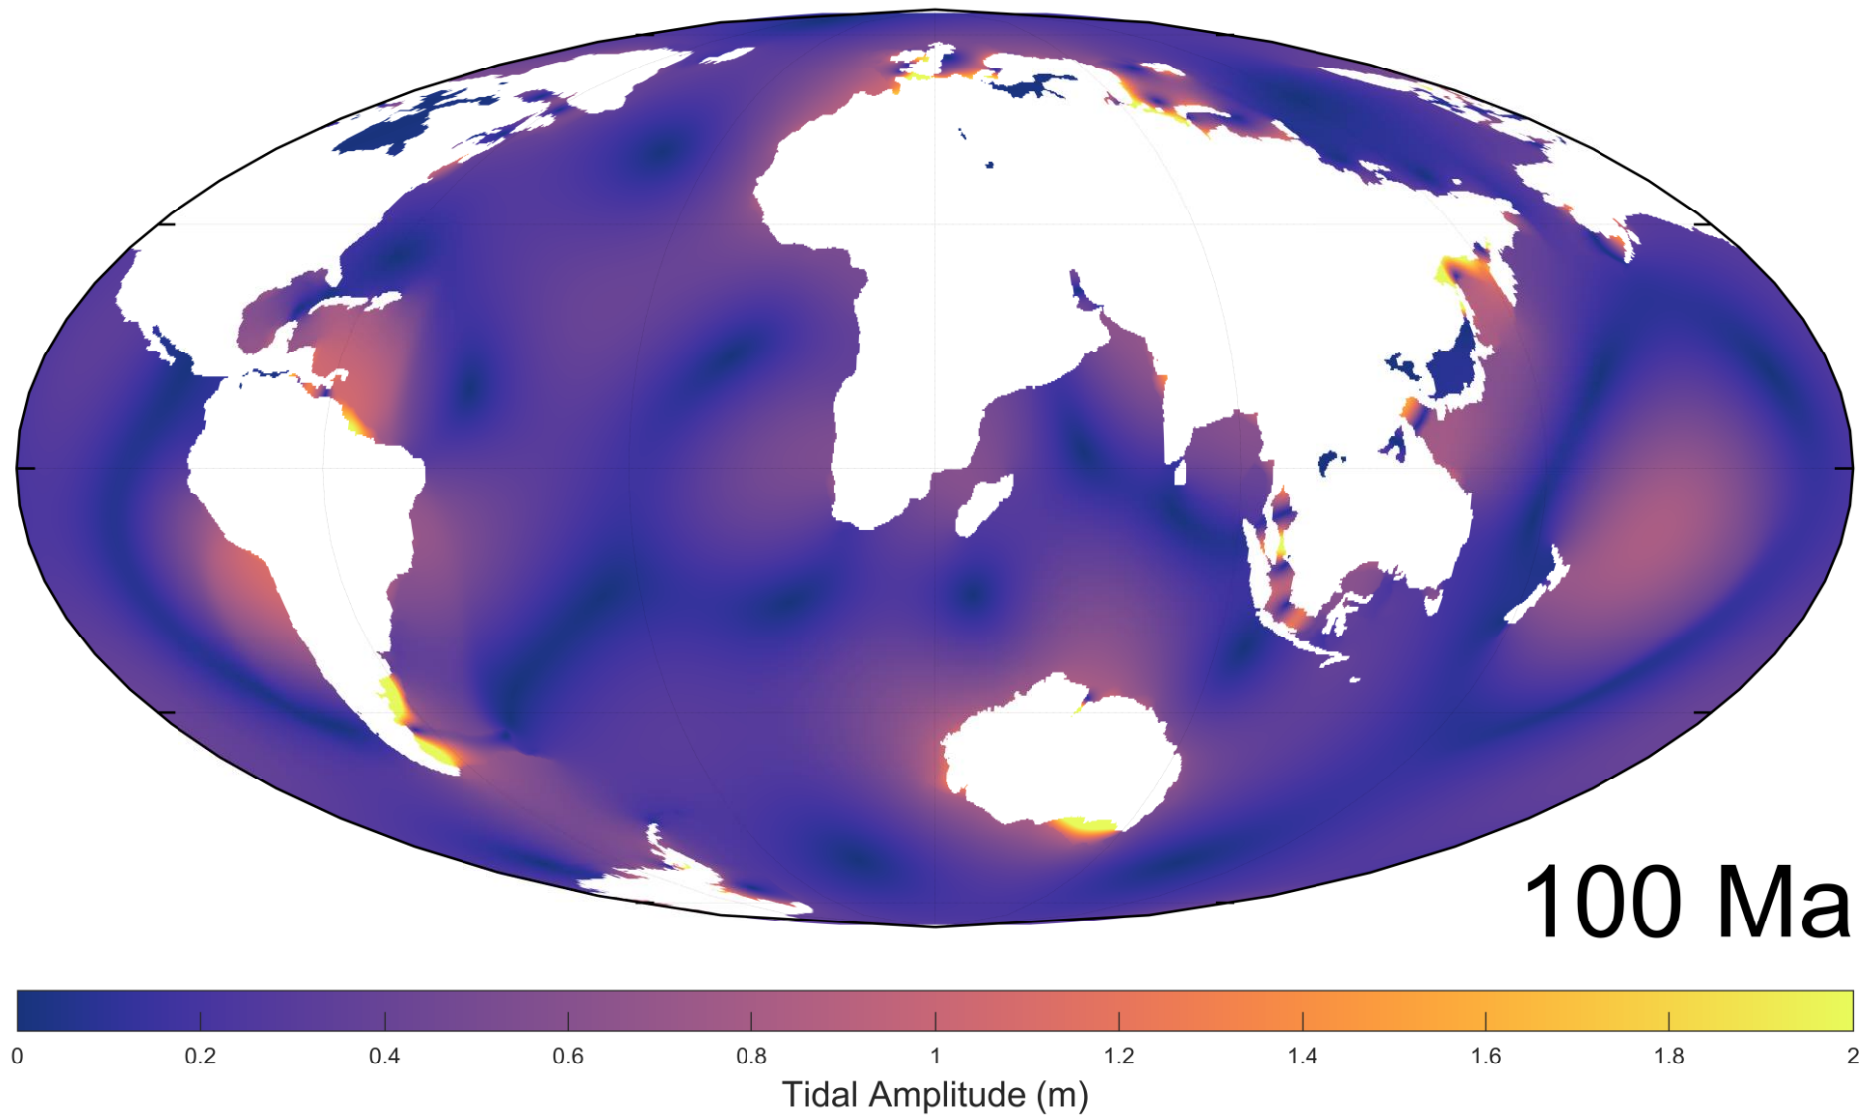

**Figure S1f: Global M<sub>2</sub> tide during the Pangea Ultima scenario continued.**

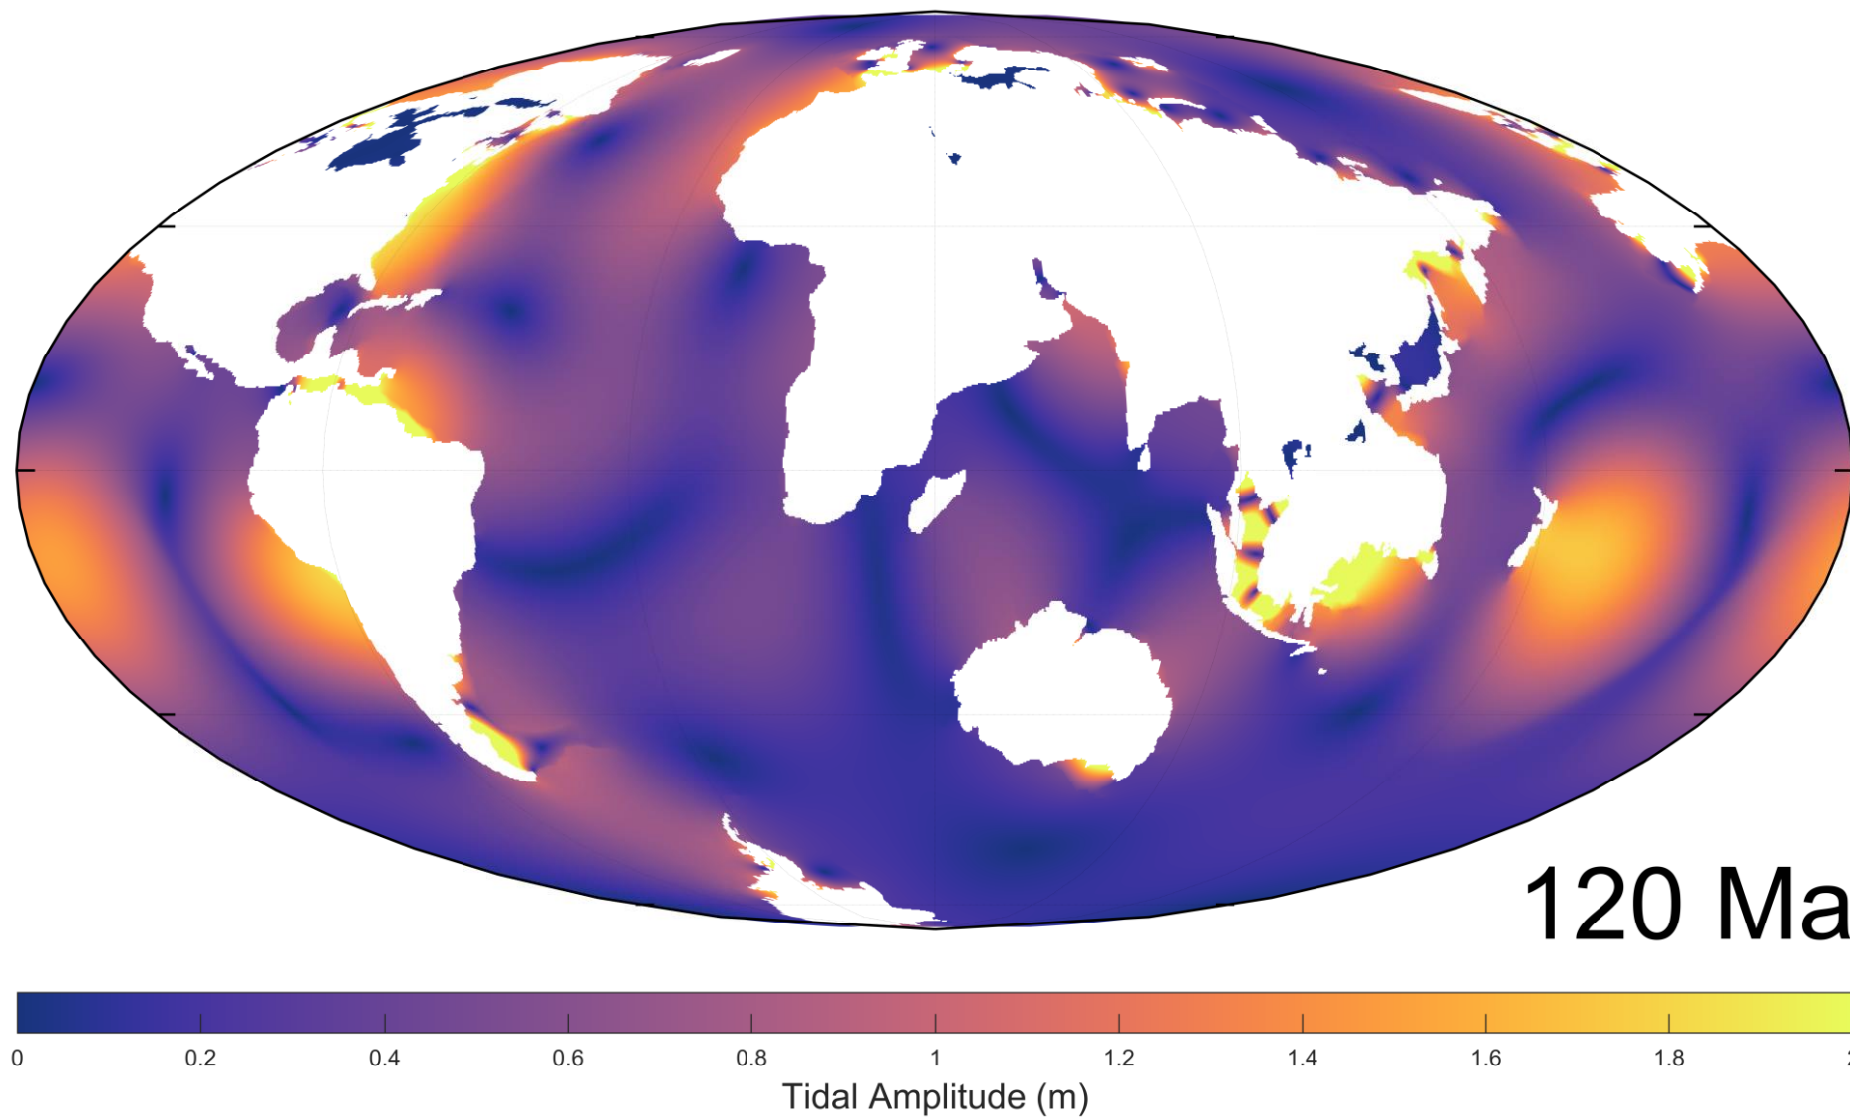

**Figure S1g: Global M<sub>2</sub> tide during the Pangea Ultima scenario continued.**



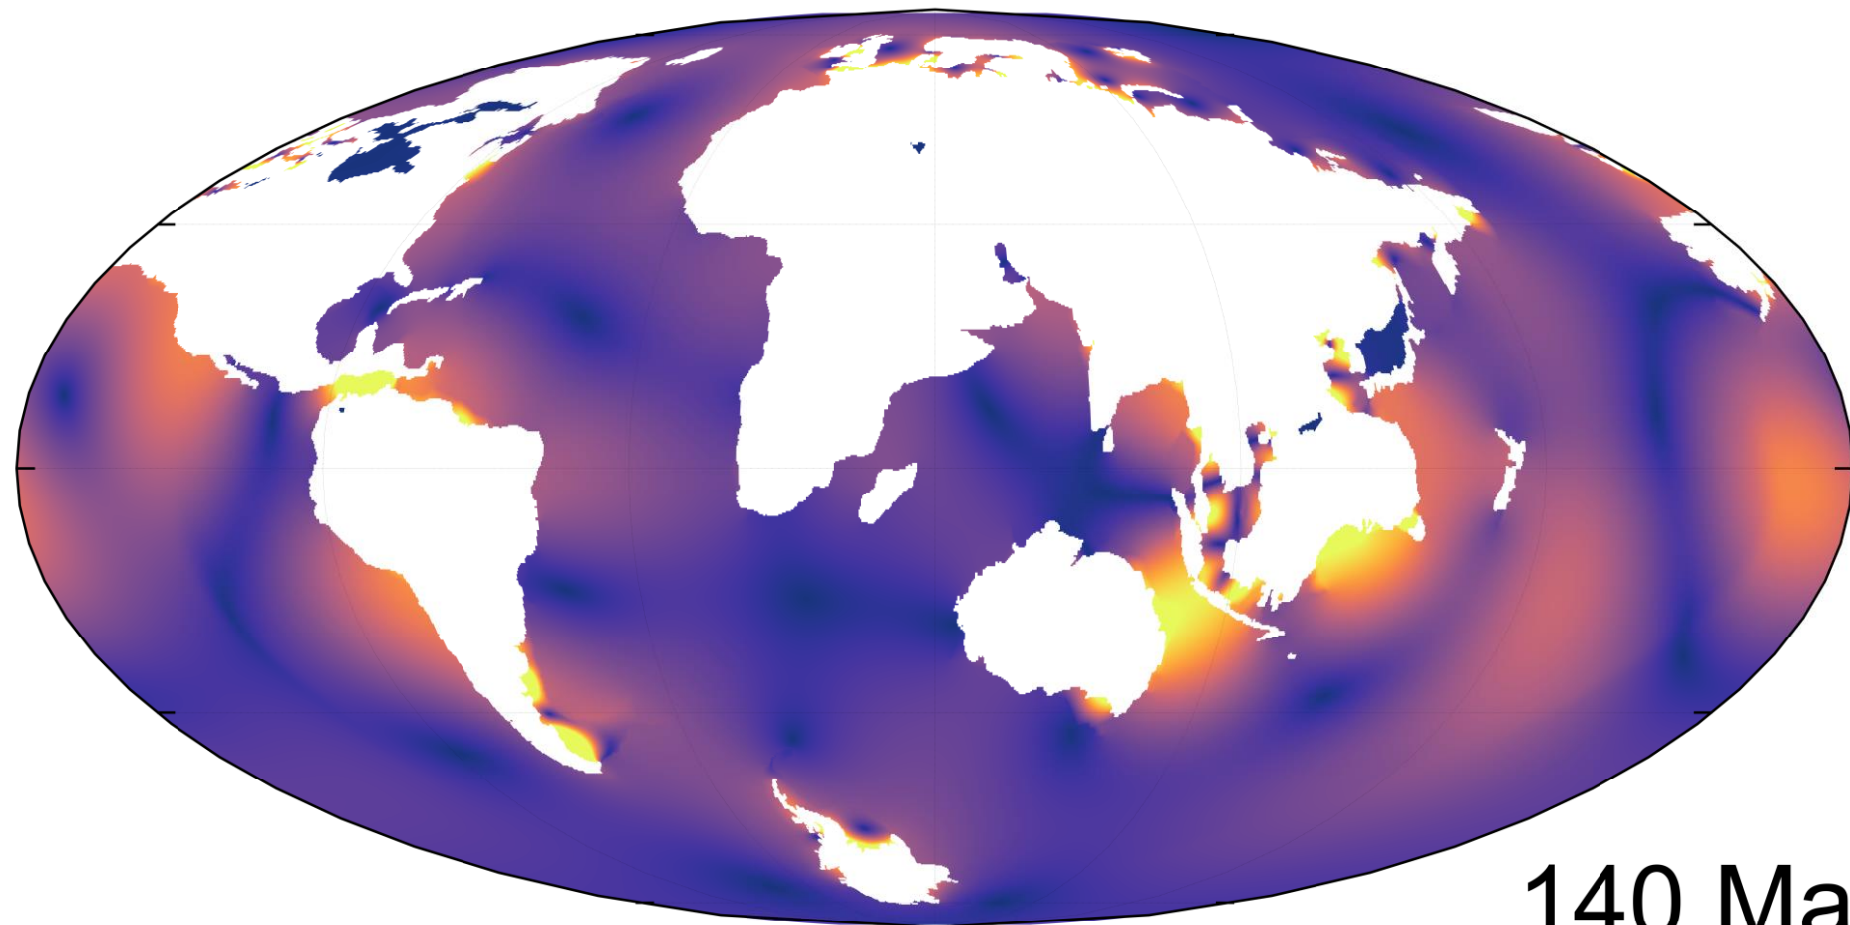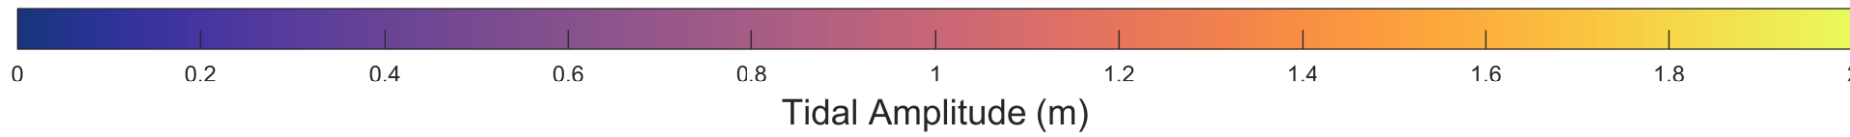

**Figure S1h: Global  $M_2$  tide during the Pangea Ultima scenario continued.**

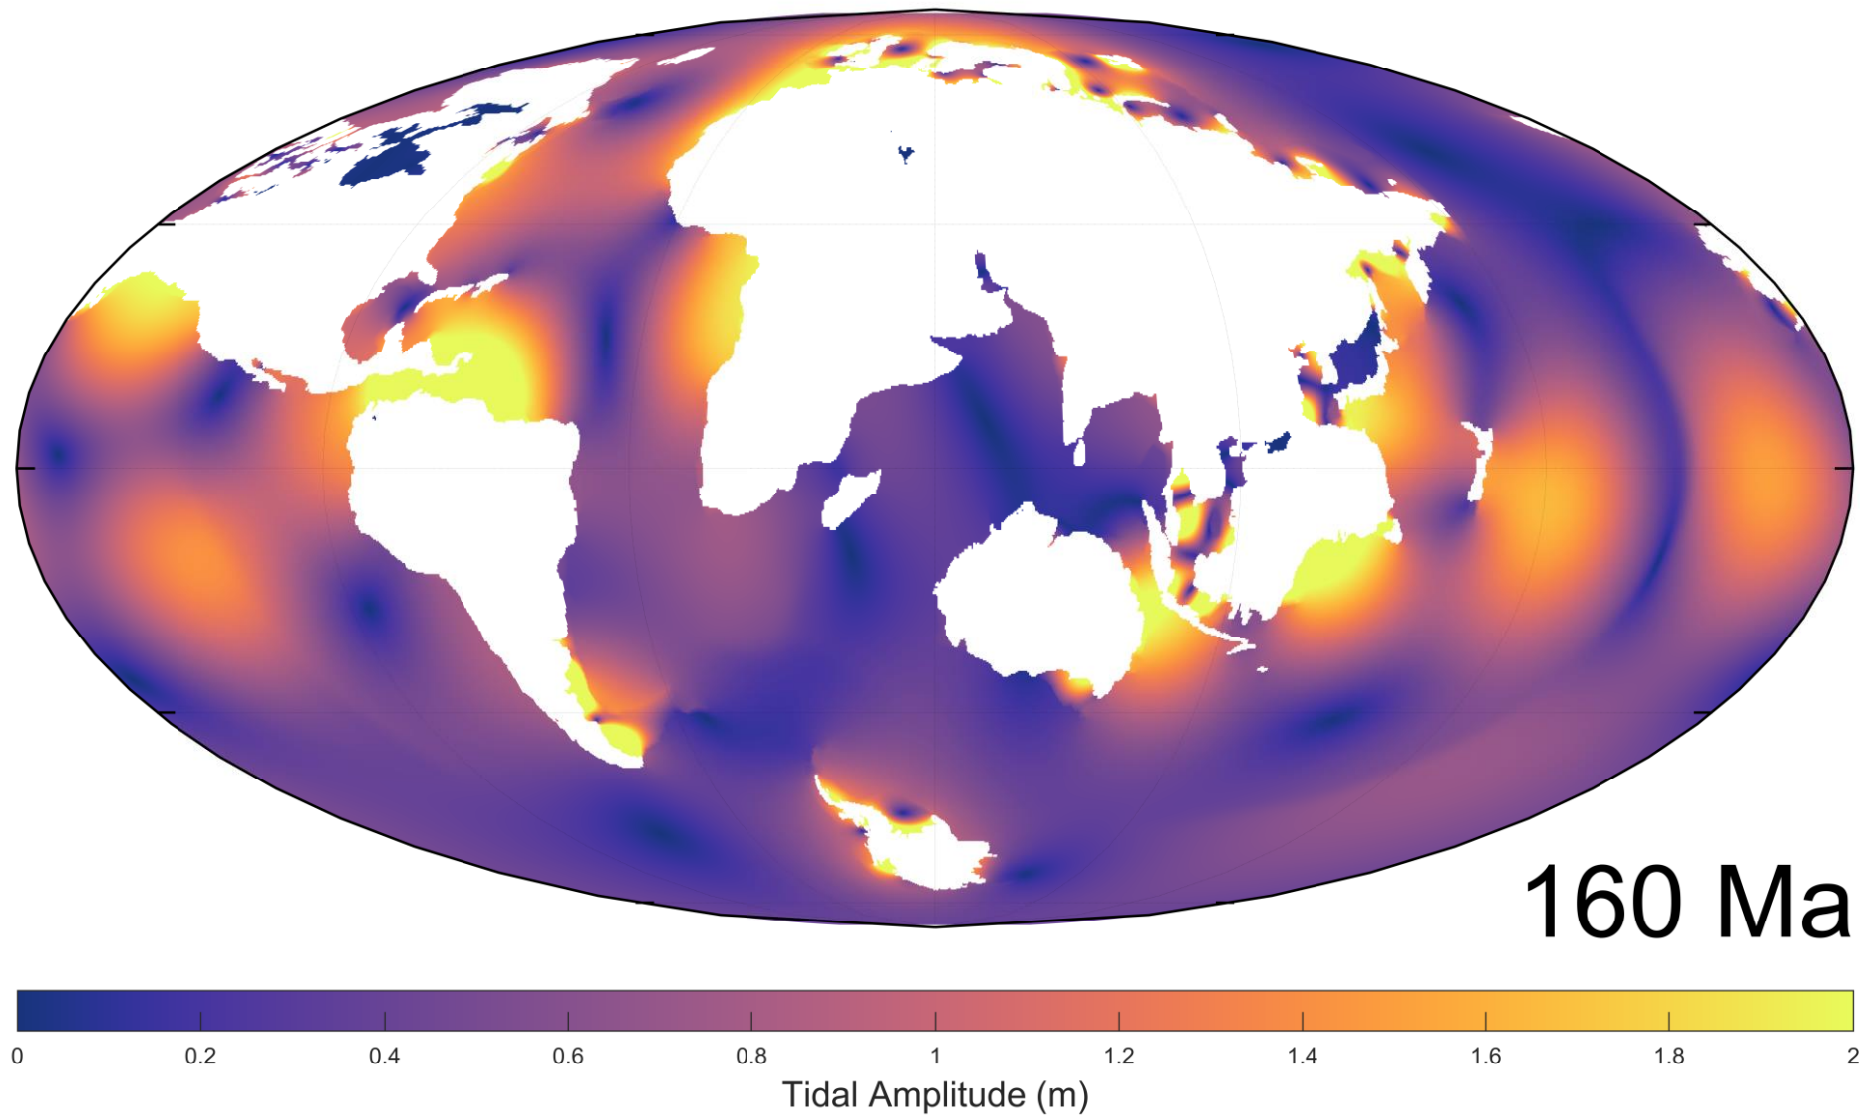

**Figure S1i: Global M<sub>2</sub> tide during the Pangea Ultima scenario continued.**

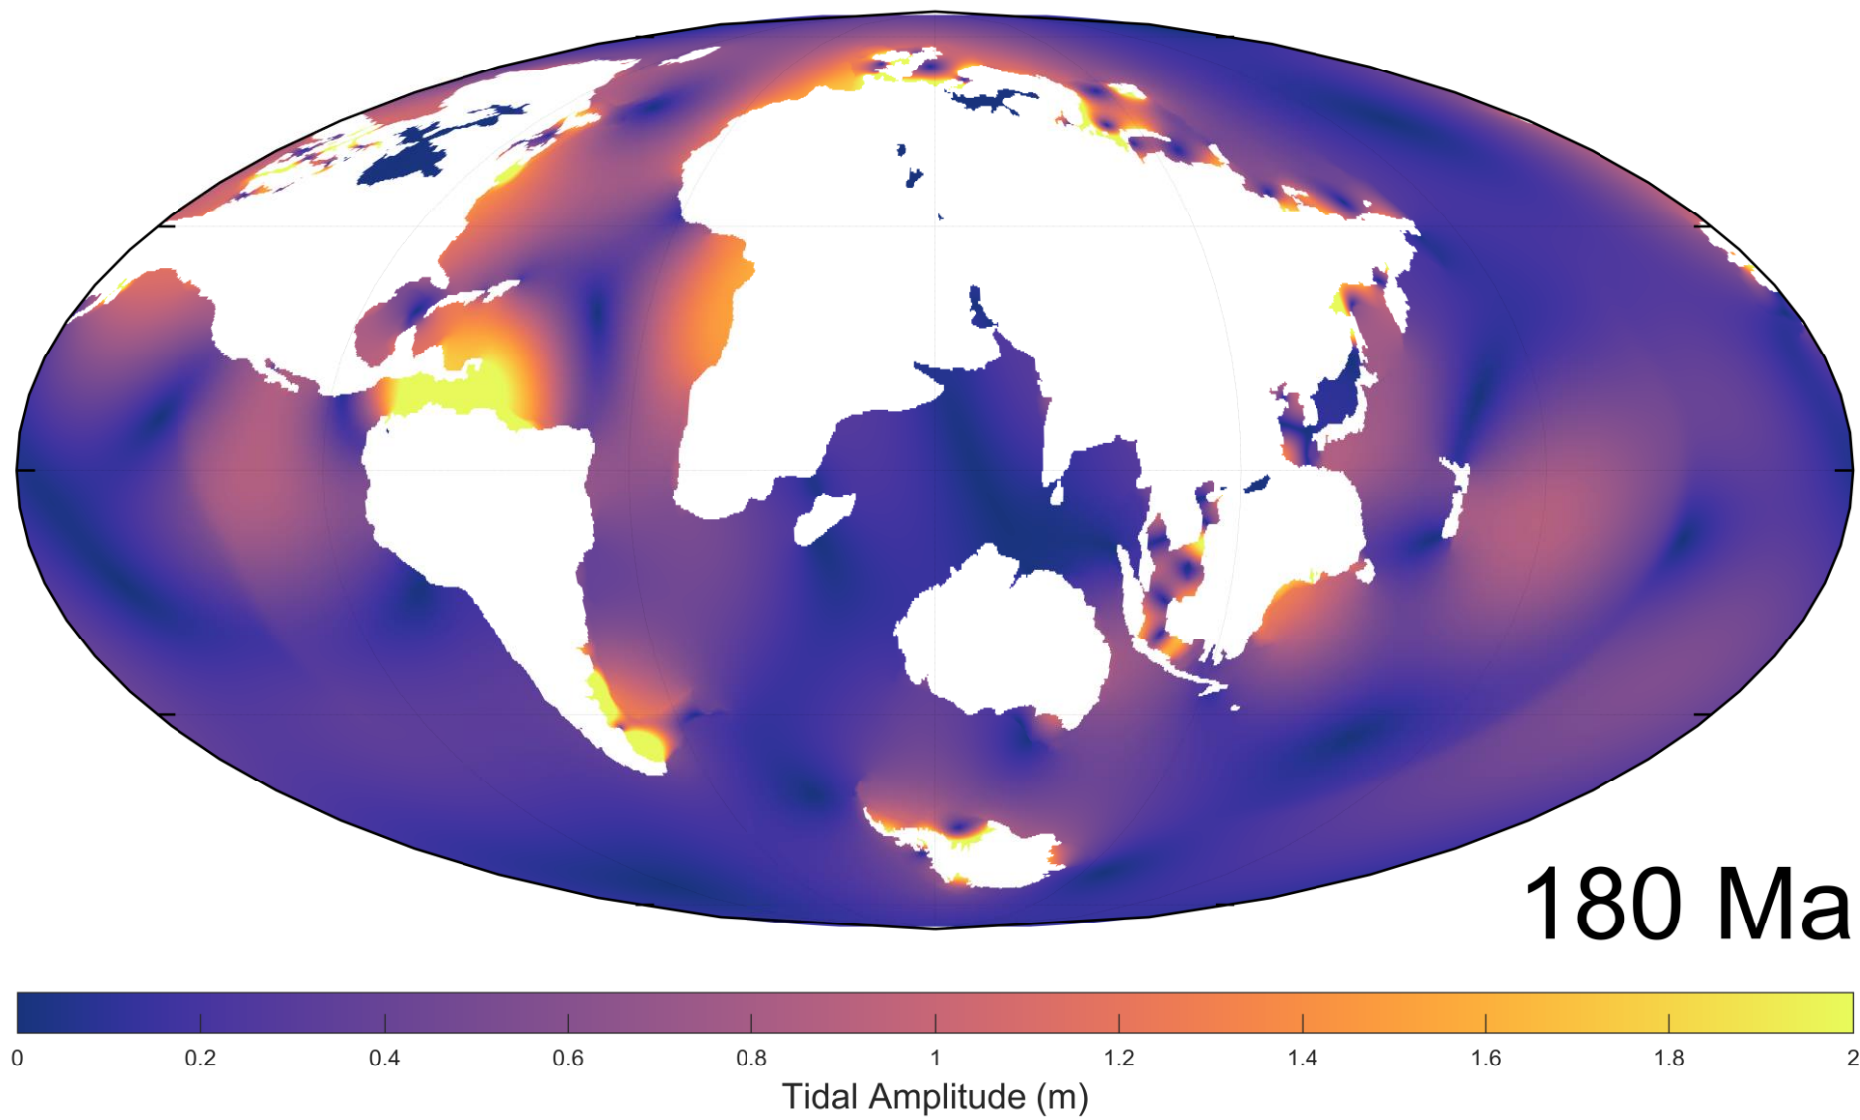

**Figure S1j: Global M<sub>2</sub> tide during the Pangea Ultima scenario continued.**

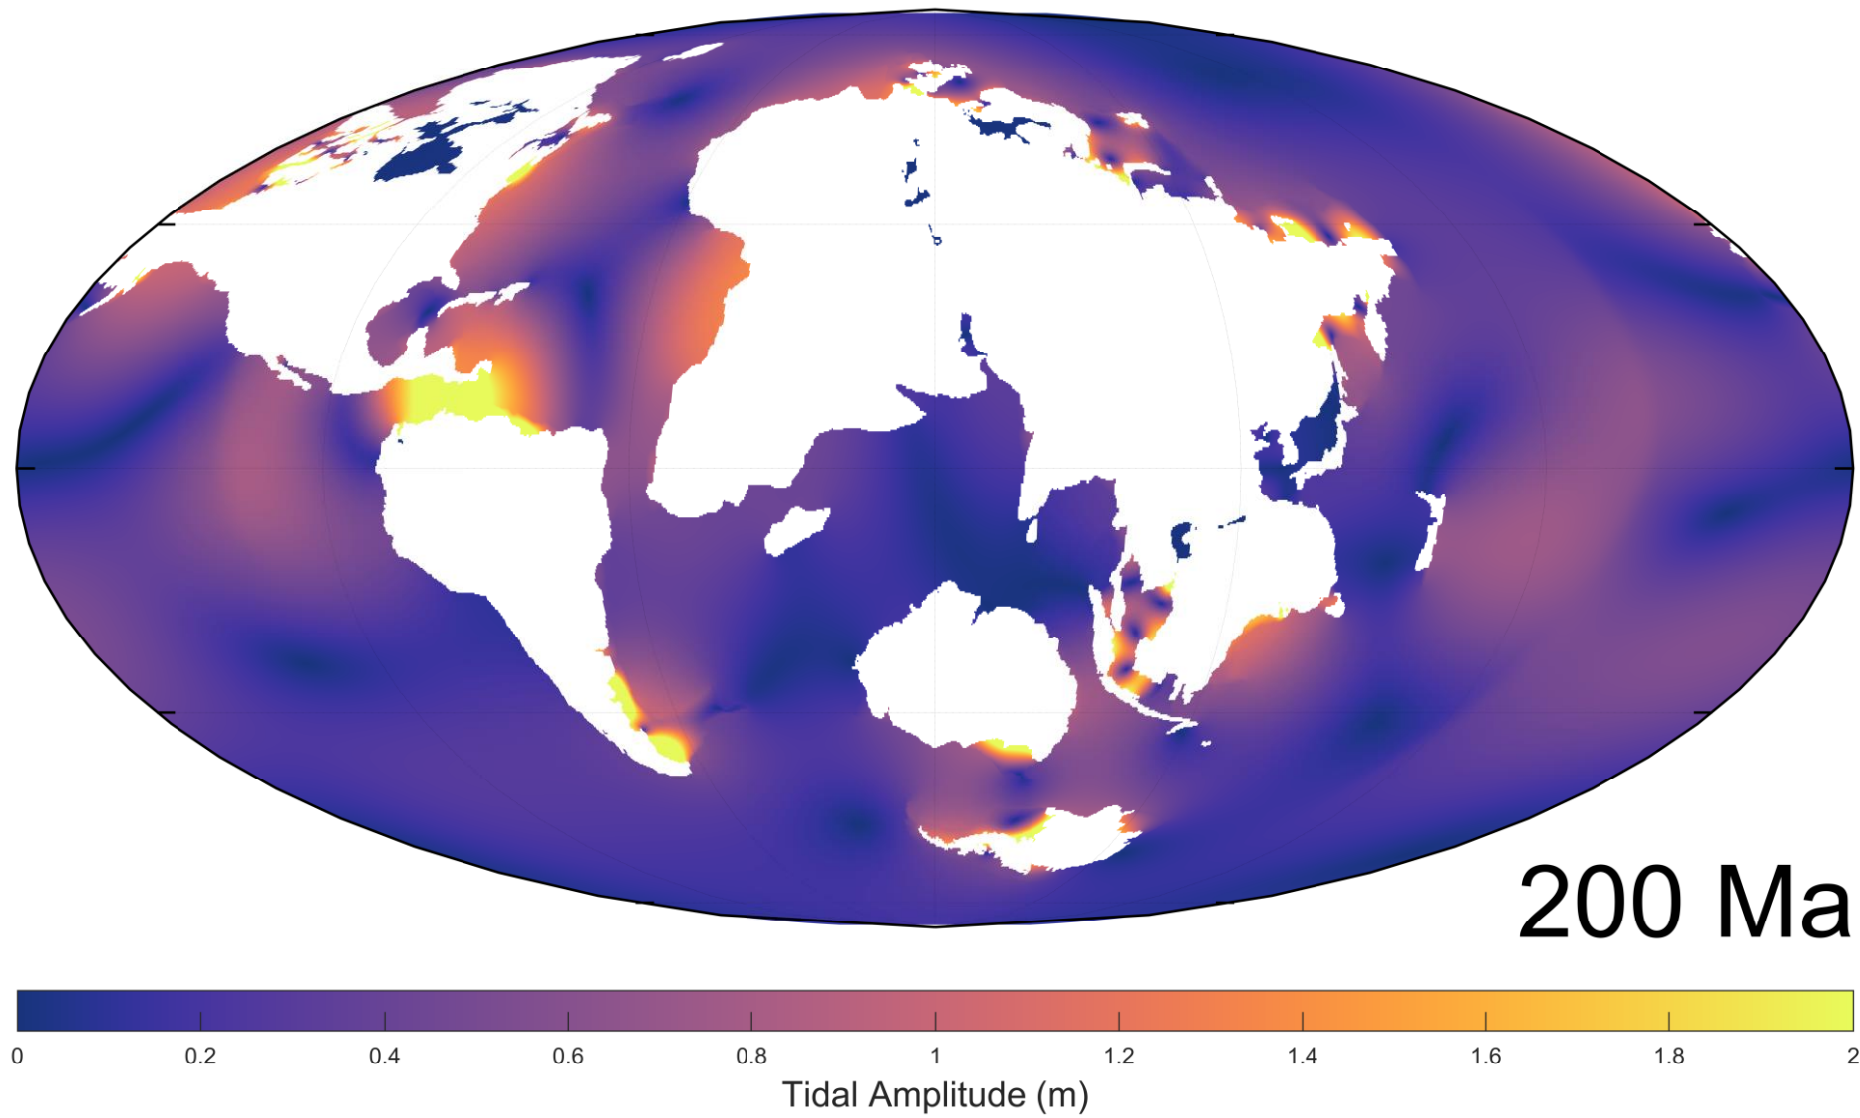

**Figure S1k: Global M<sub>2</sub> tide during the Pangea Ultima scenario continued.**

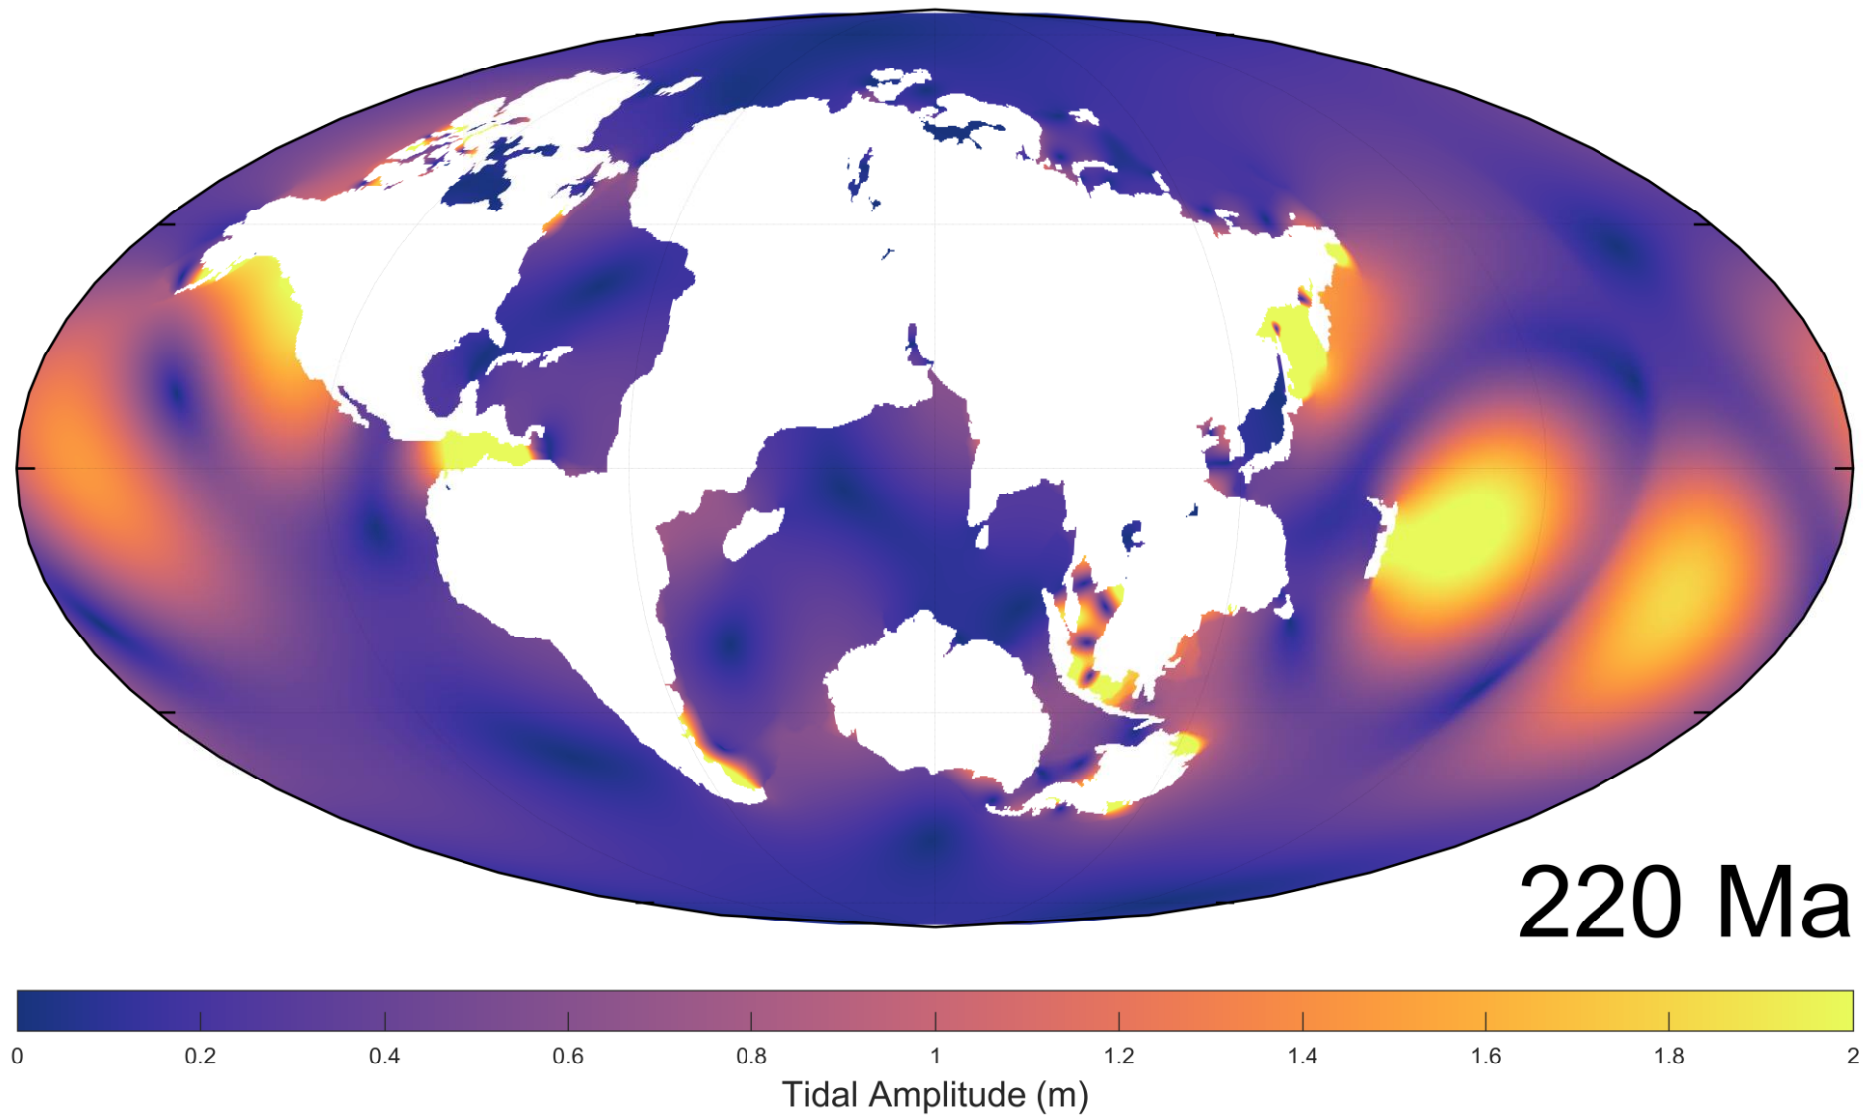

**Figure S11: Global M<sub>2</sub> tide during the Pangea Ultima scenario continued.**

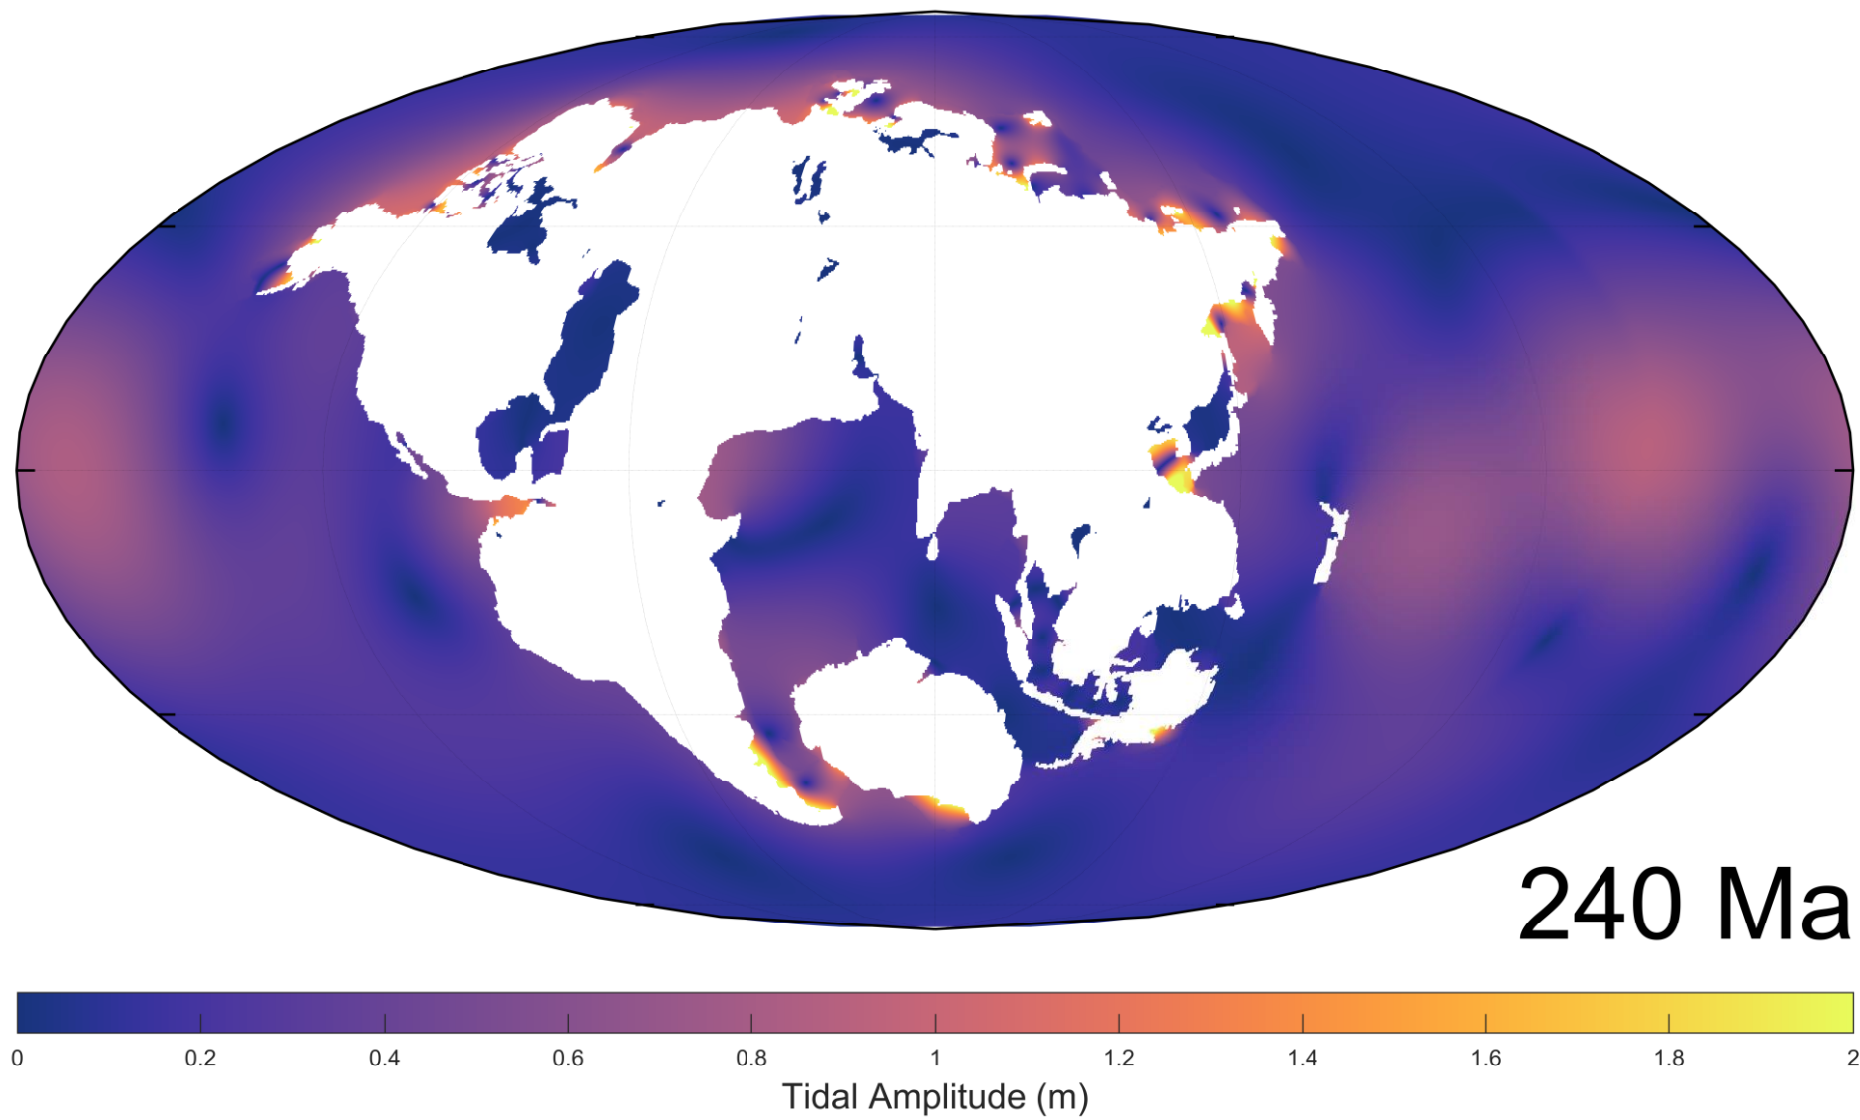

**Figure S1m: Global M<sub>2</sub> tide during the Pangea Ultima scenario continued.**

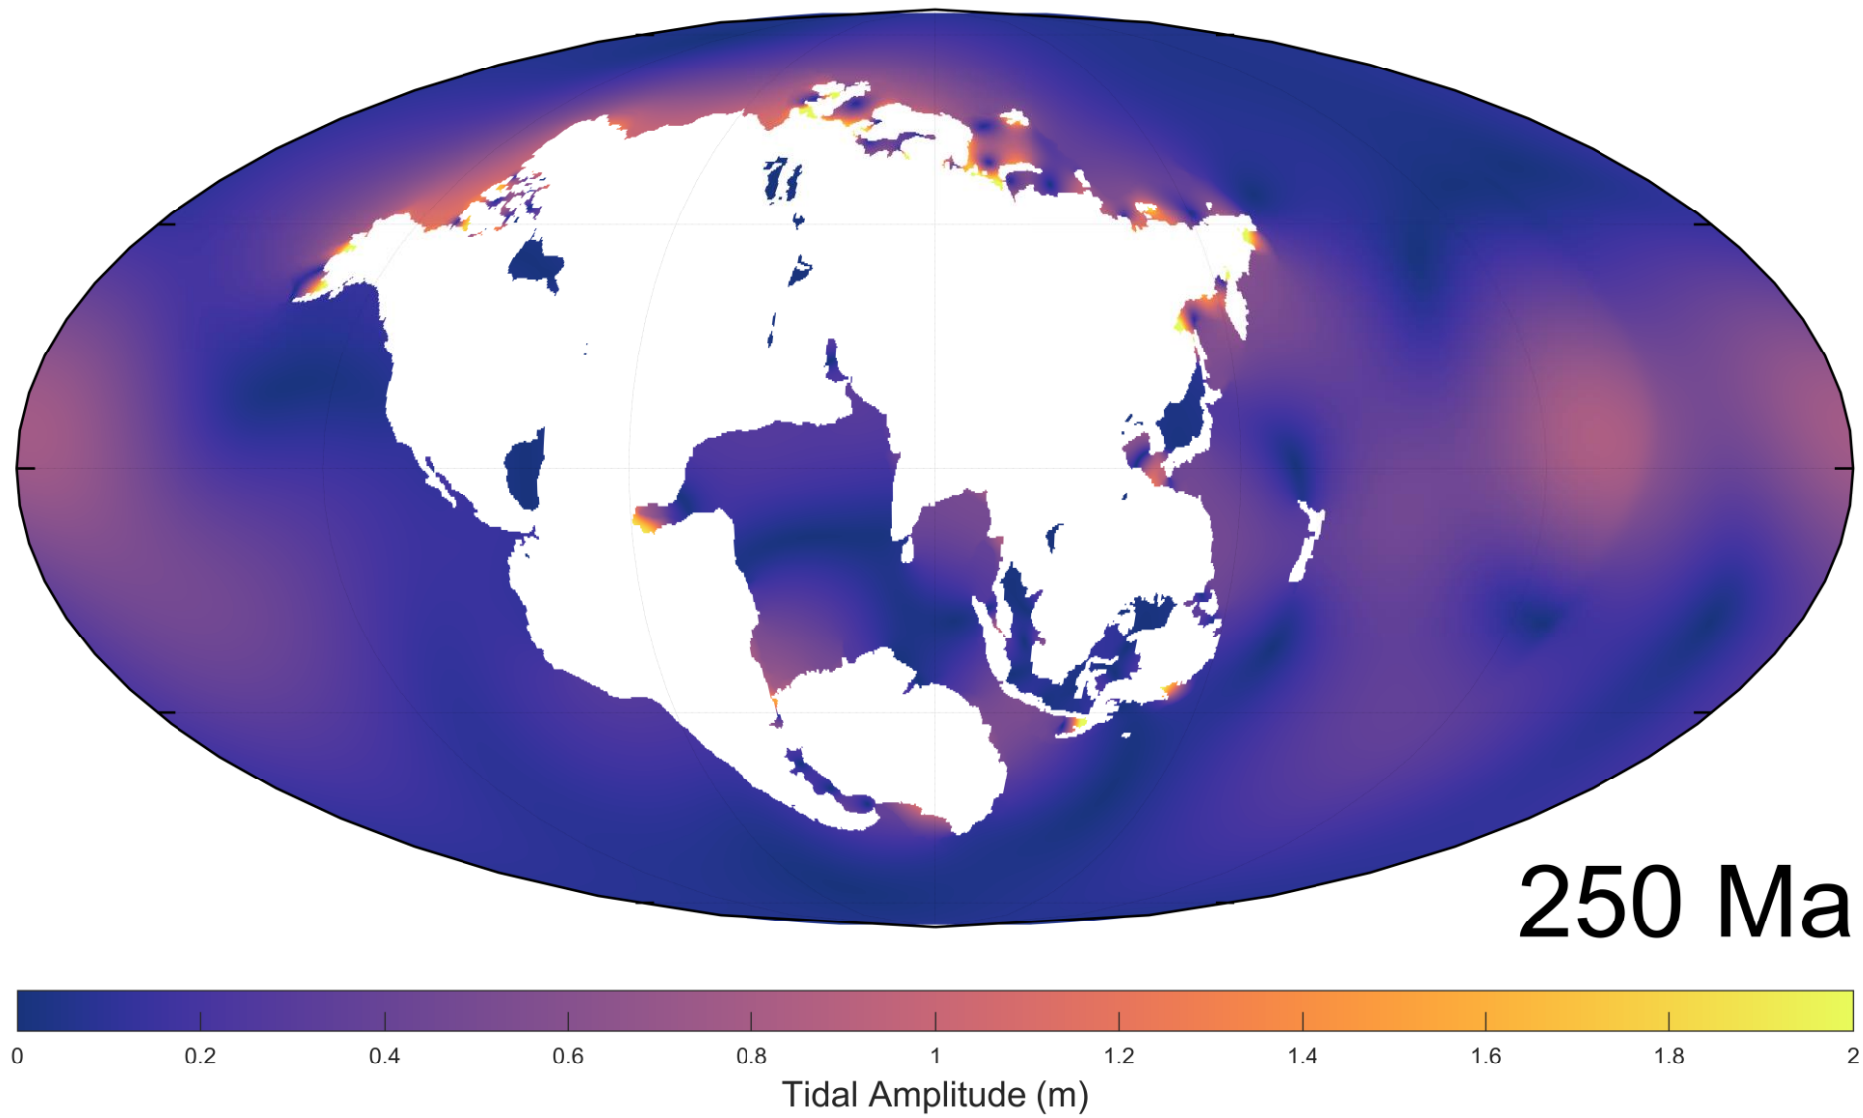

Figure S1n: Global M<sub>2</sub> tide during the Pangea Ultima scenario continued.

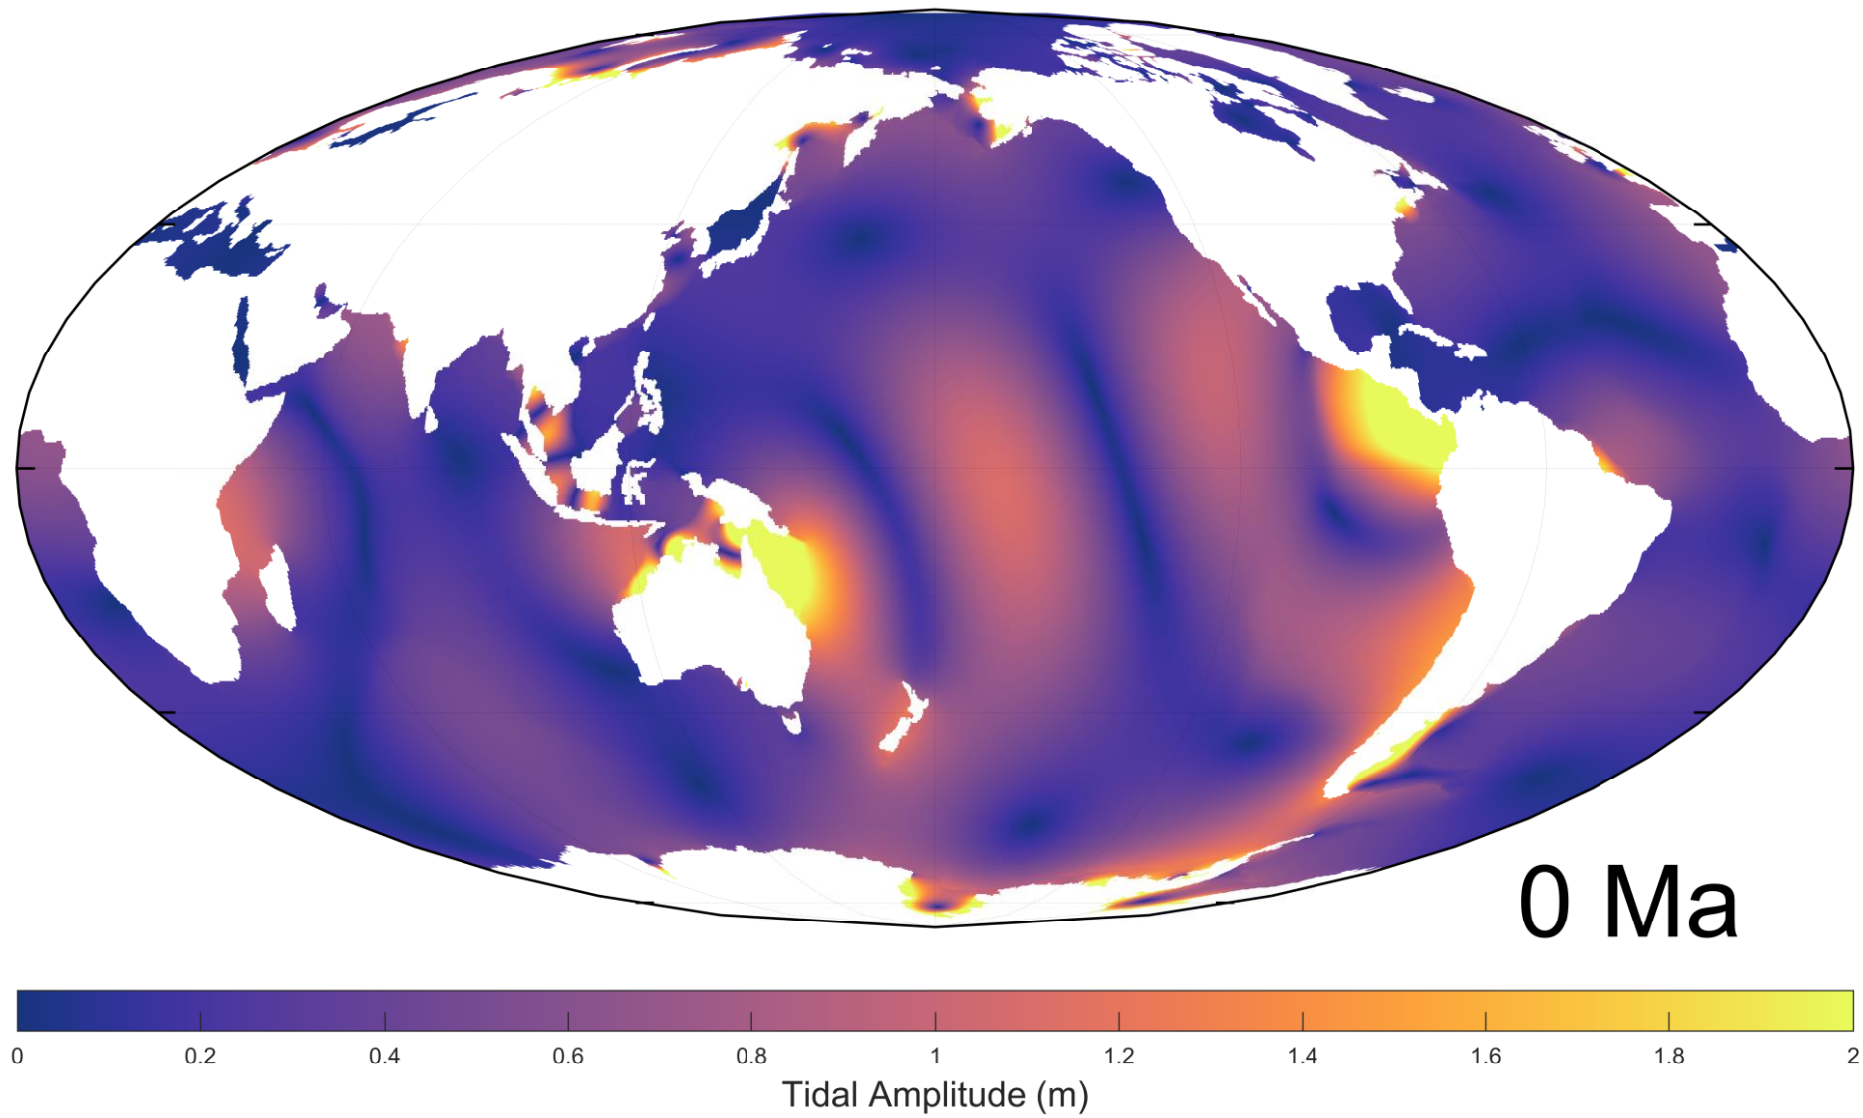

**Figure S2a: Global  $M_2$  amplitudes for the present day (0 Ma) of the Novopangea scenario. The colour scale saturates at 2 m.**



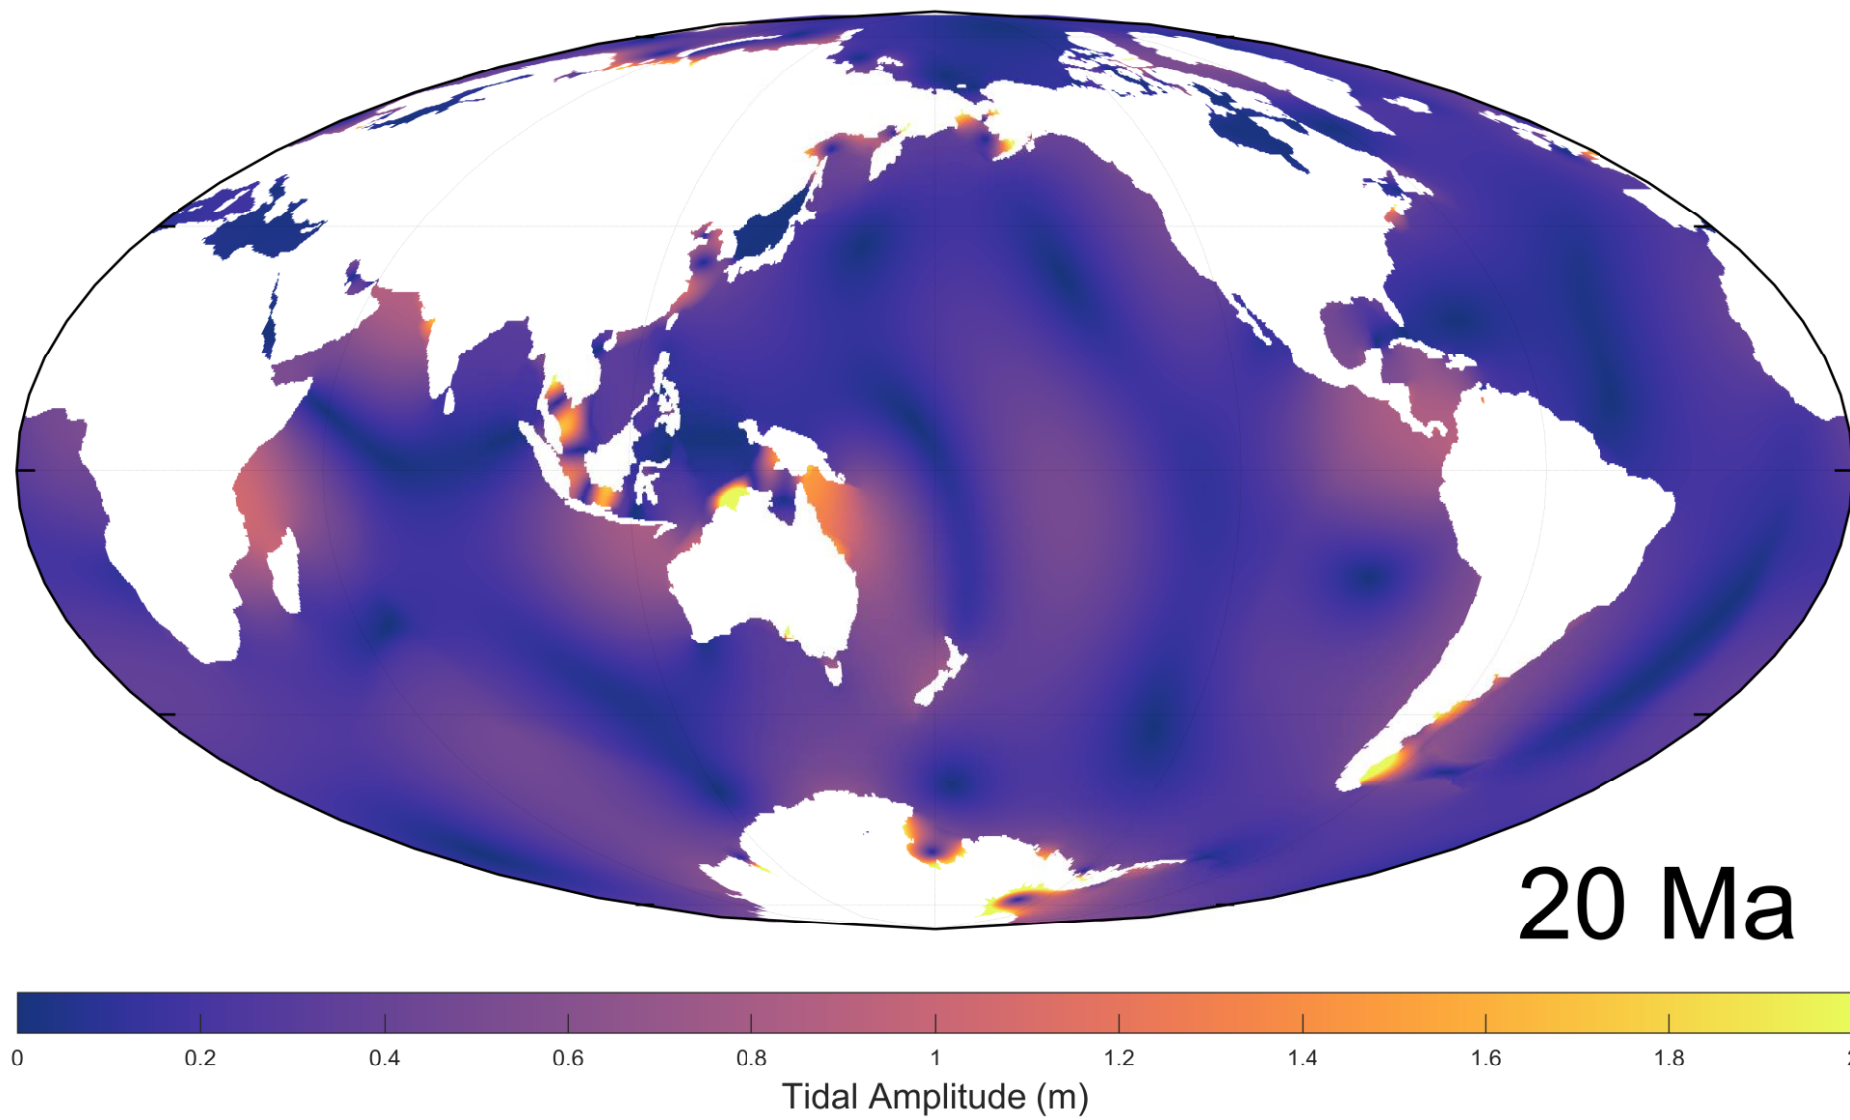

**Figure S2b: Global M<sub>2</sub> tide during the Novopangea scenario continued.**

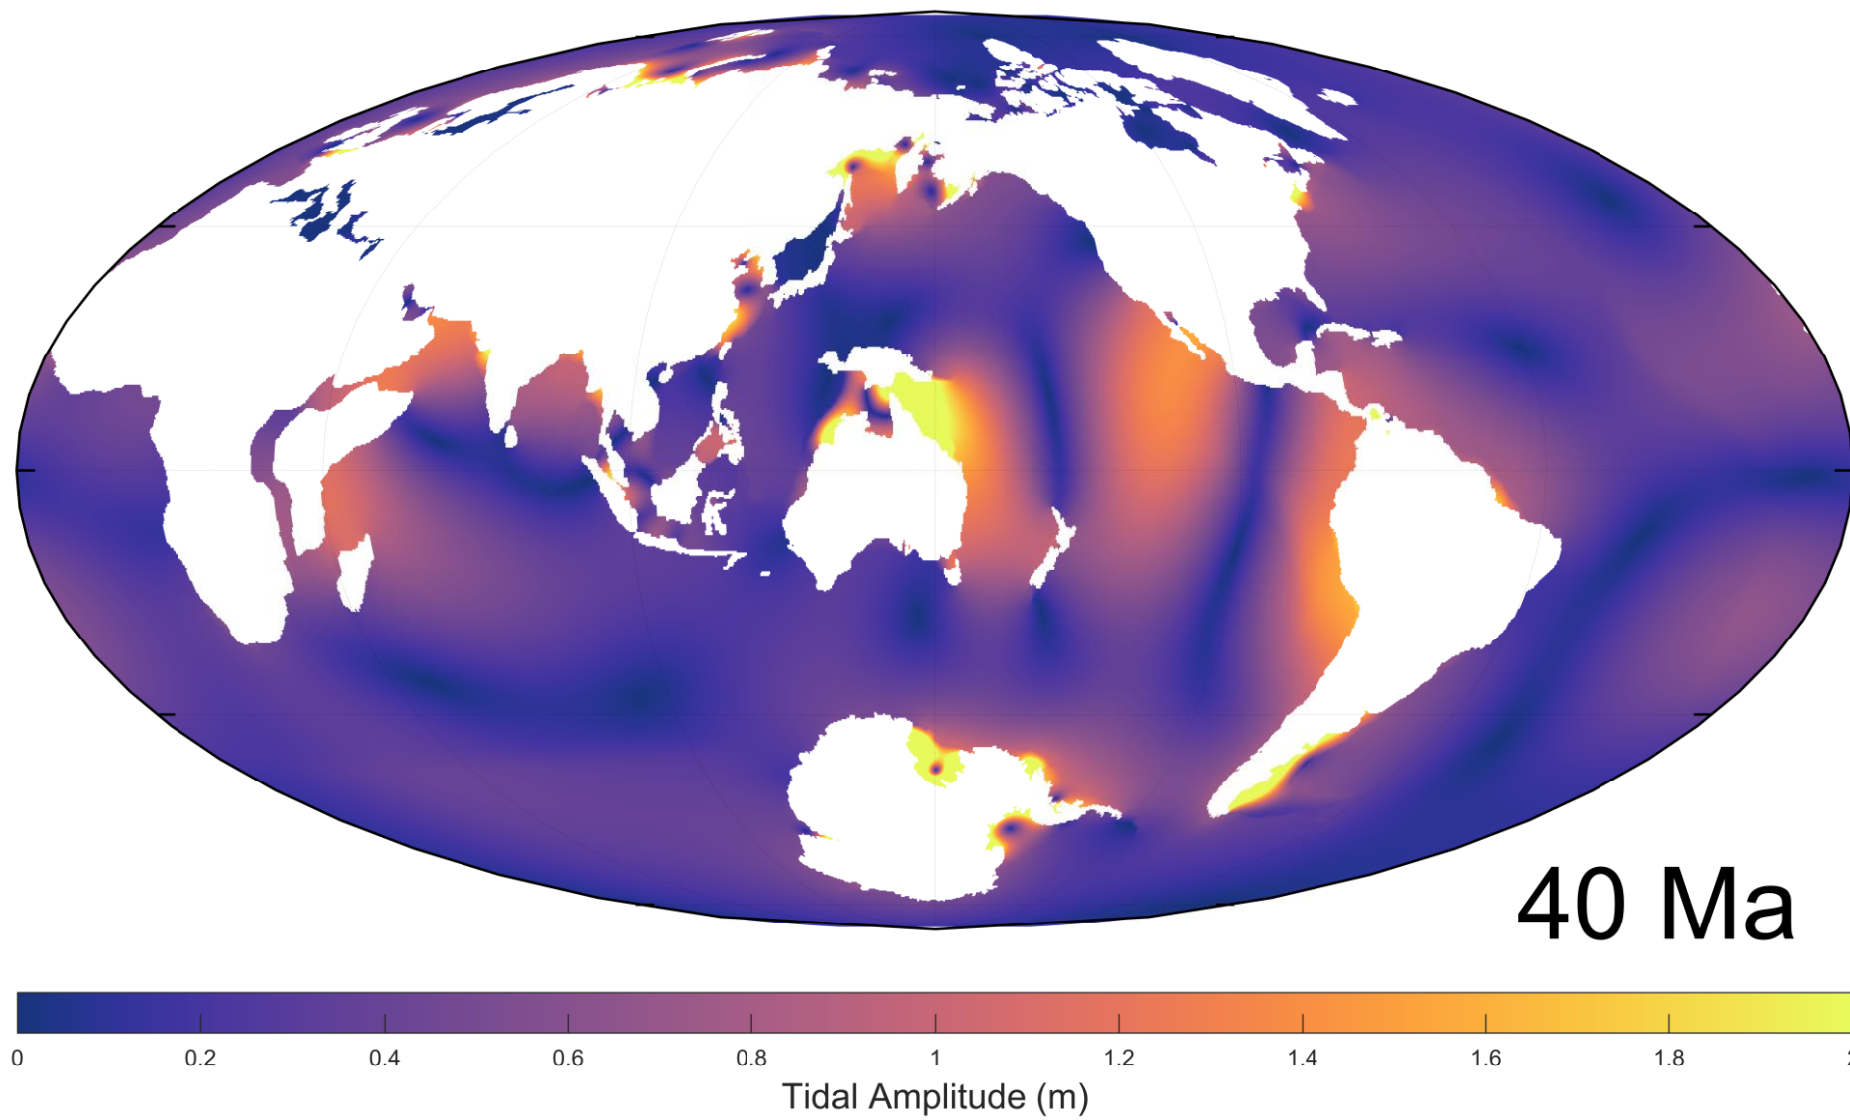

**Figure S2c: Global M<sub>2</sub> tide during the Novopangea scenario continued.**

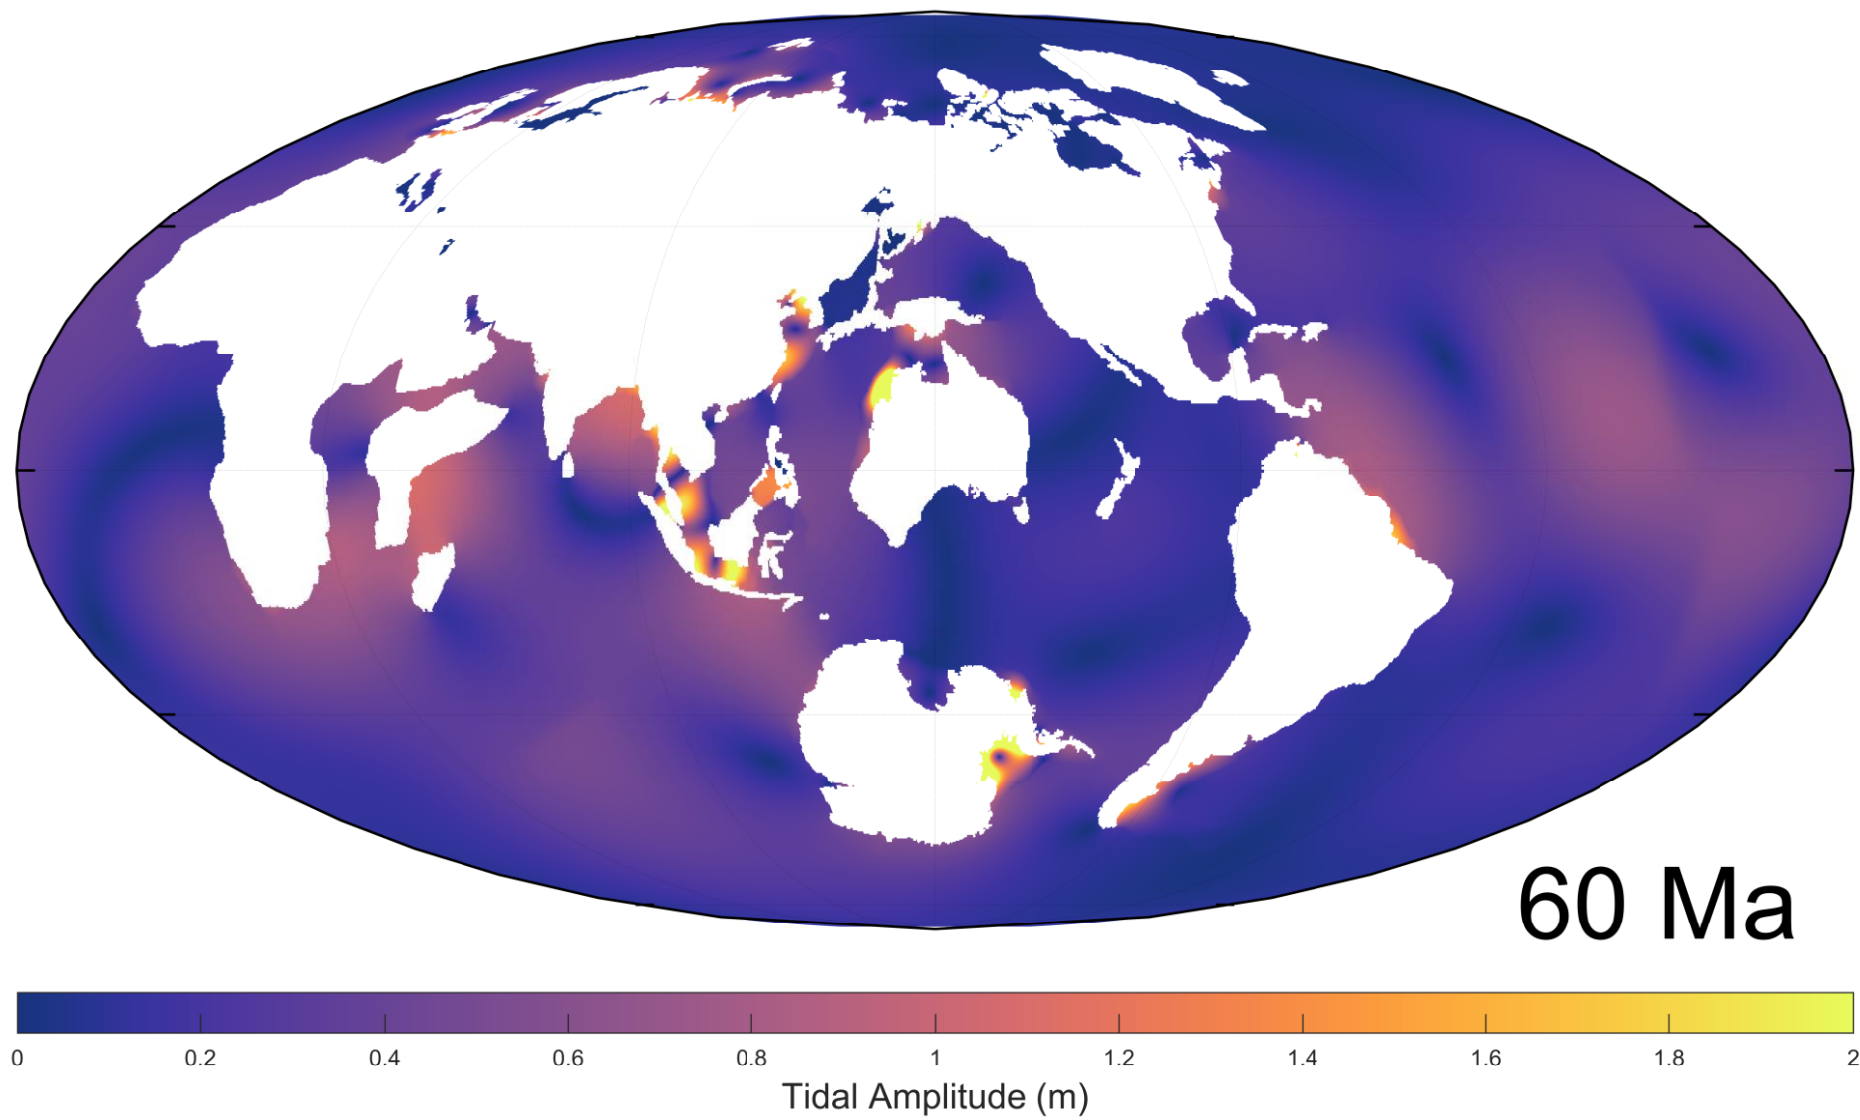

Figure S2d: Global M<sub>2</sub> tide during the Novopangea scenario continued.

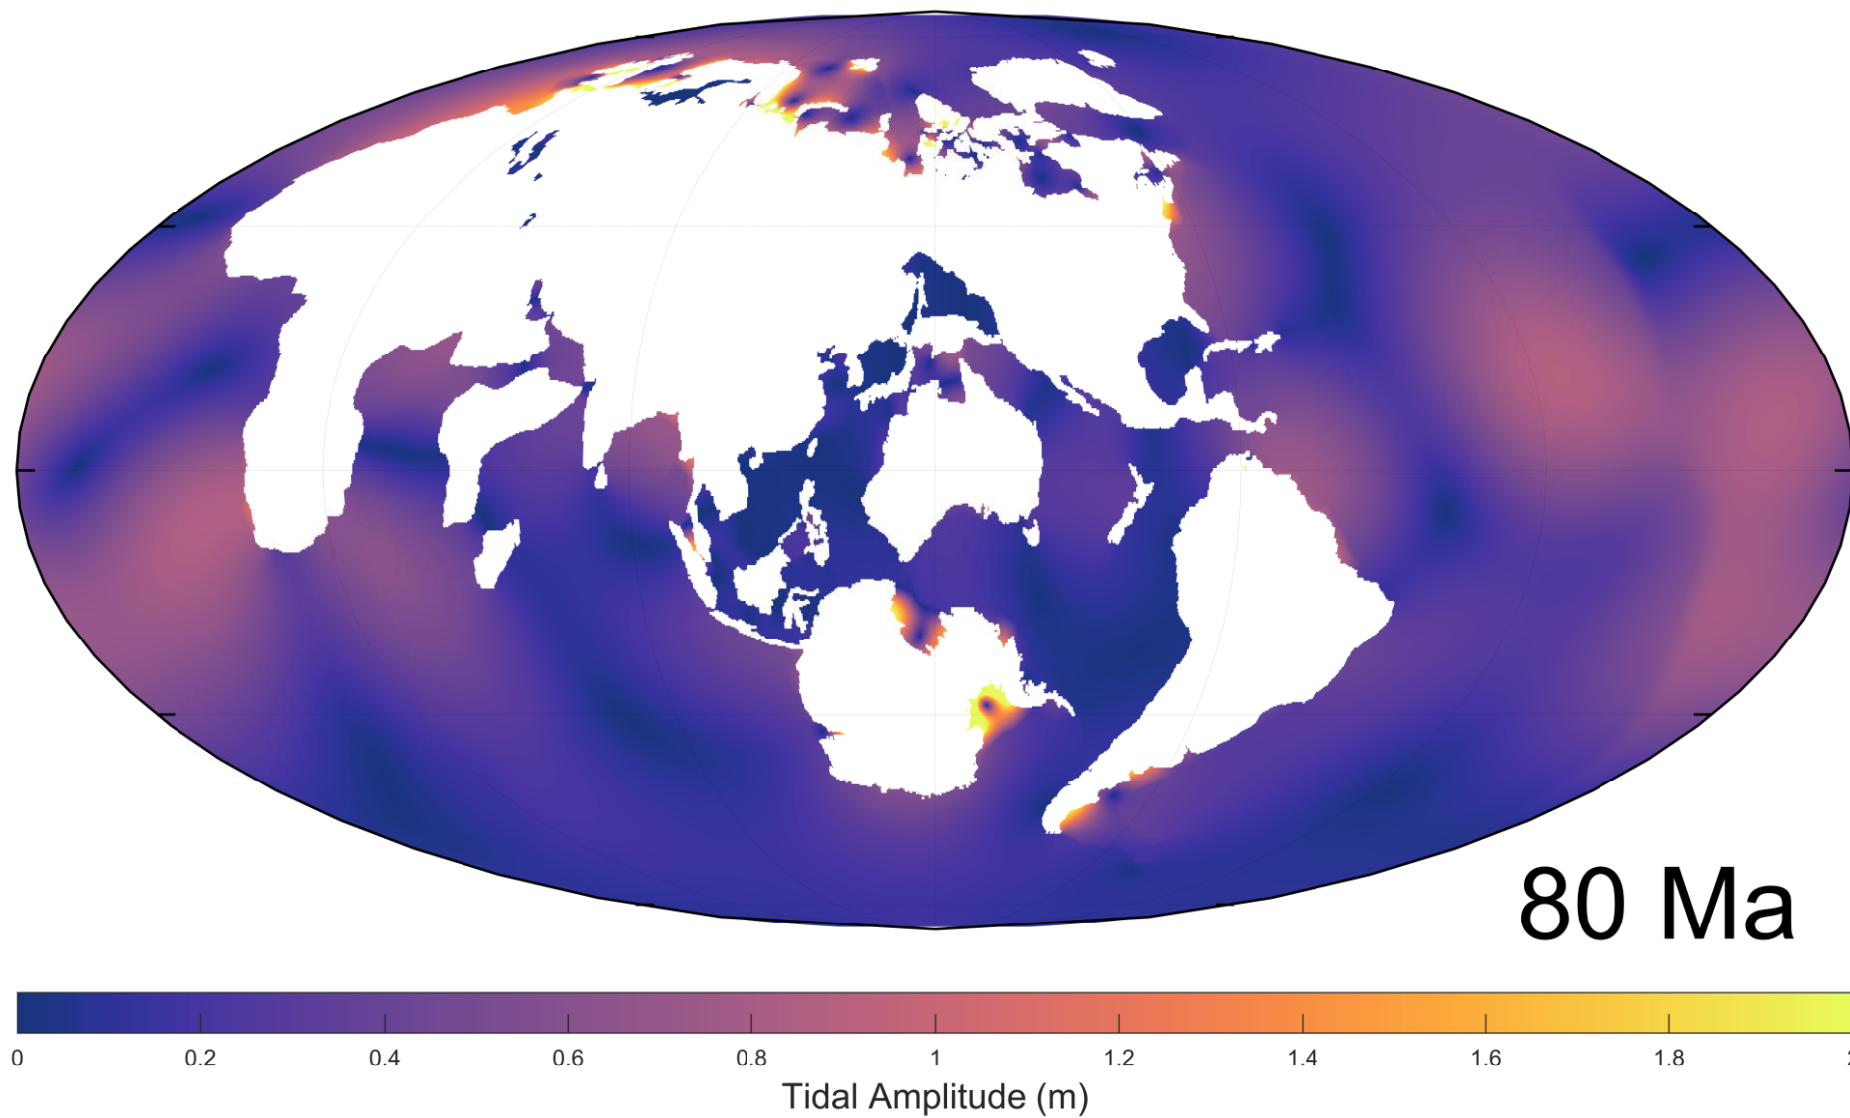

**Figure S2e: Global M<sub>2</sub> tide during the Novopangea scenario continued.**

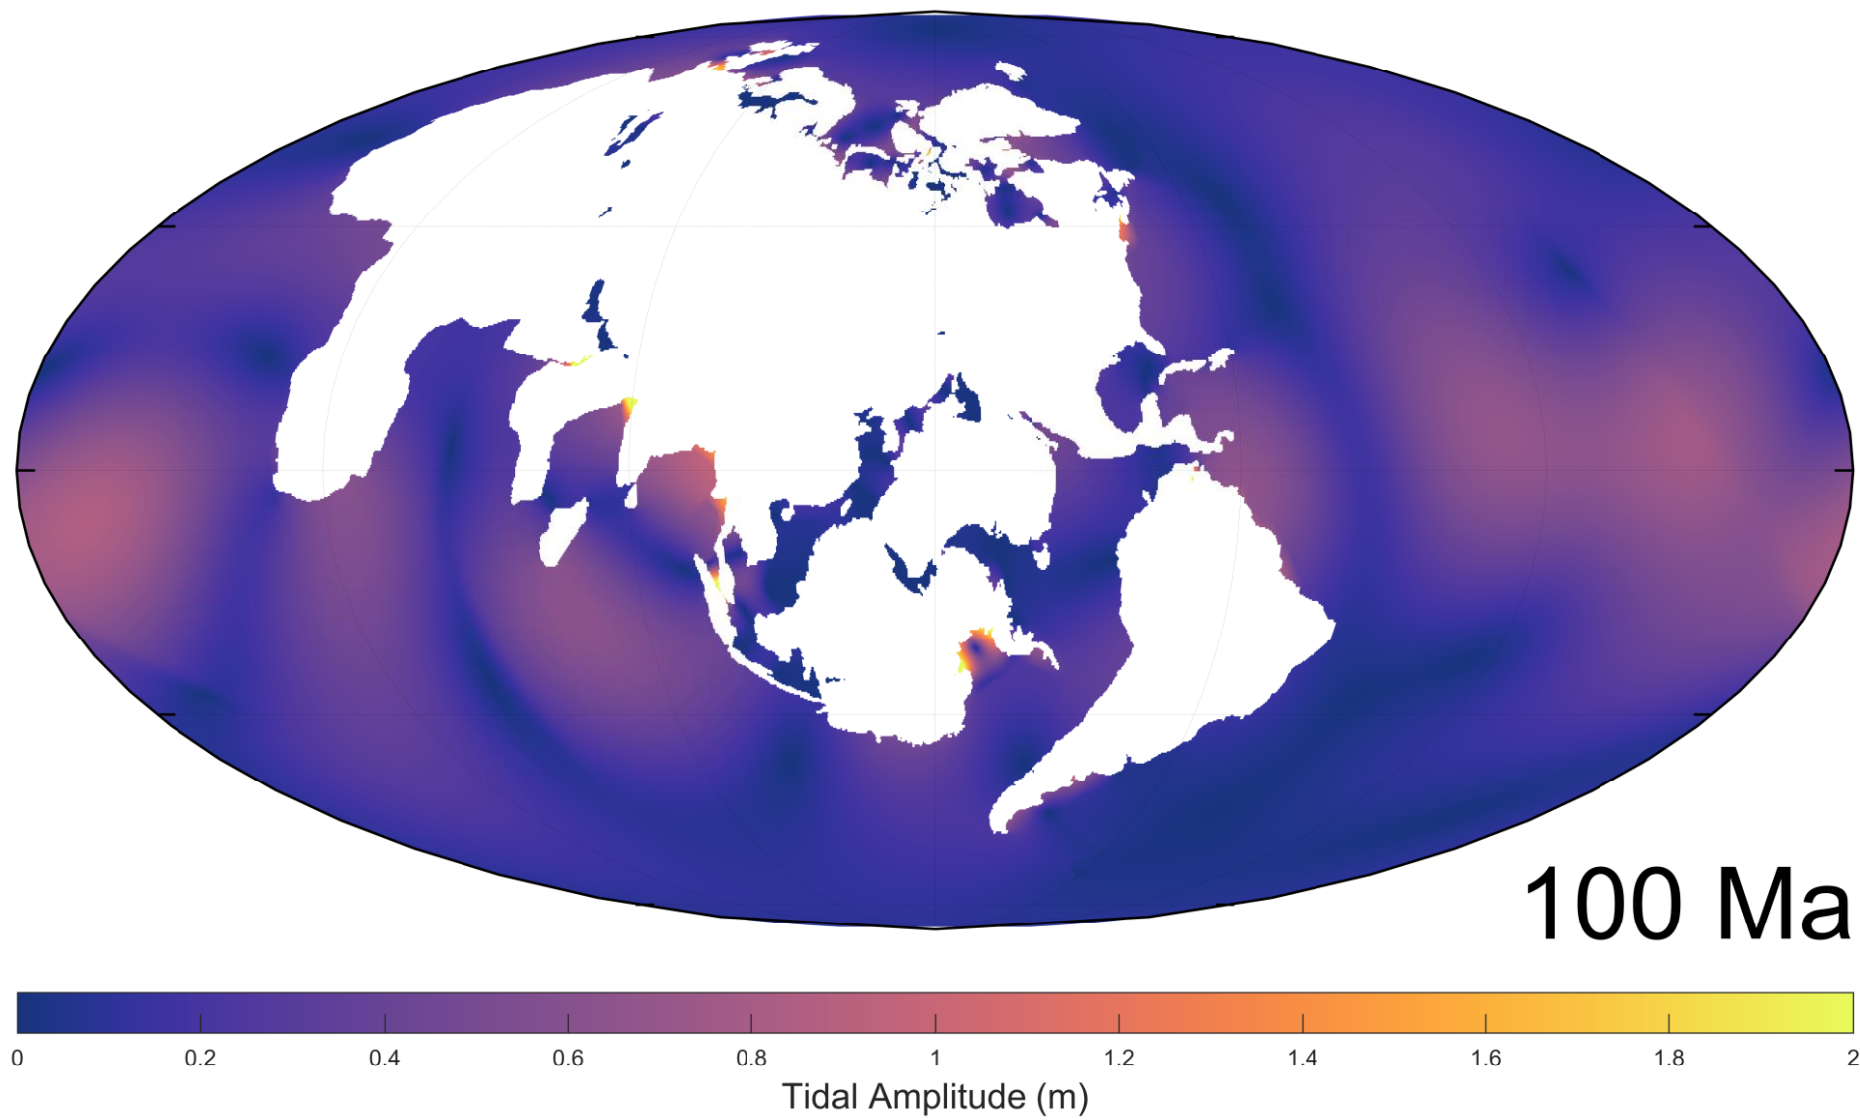

**Figure S2f: Global M<sub>2</sub> tide during the Novopangea scenario continued.**

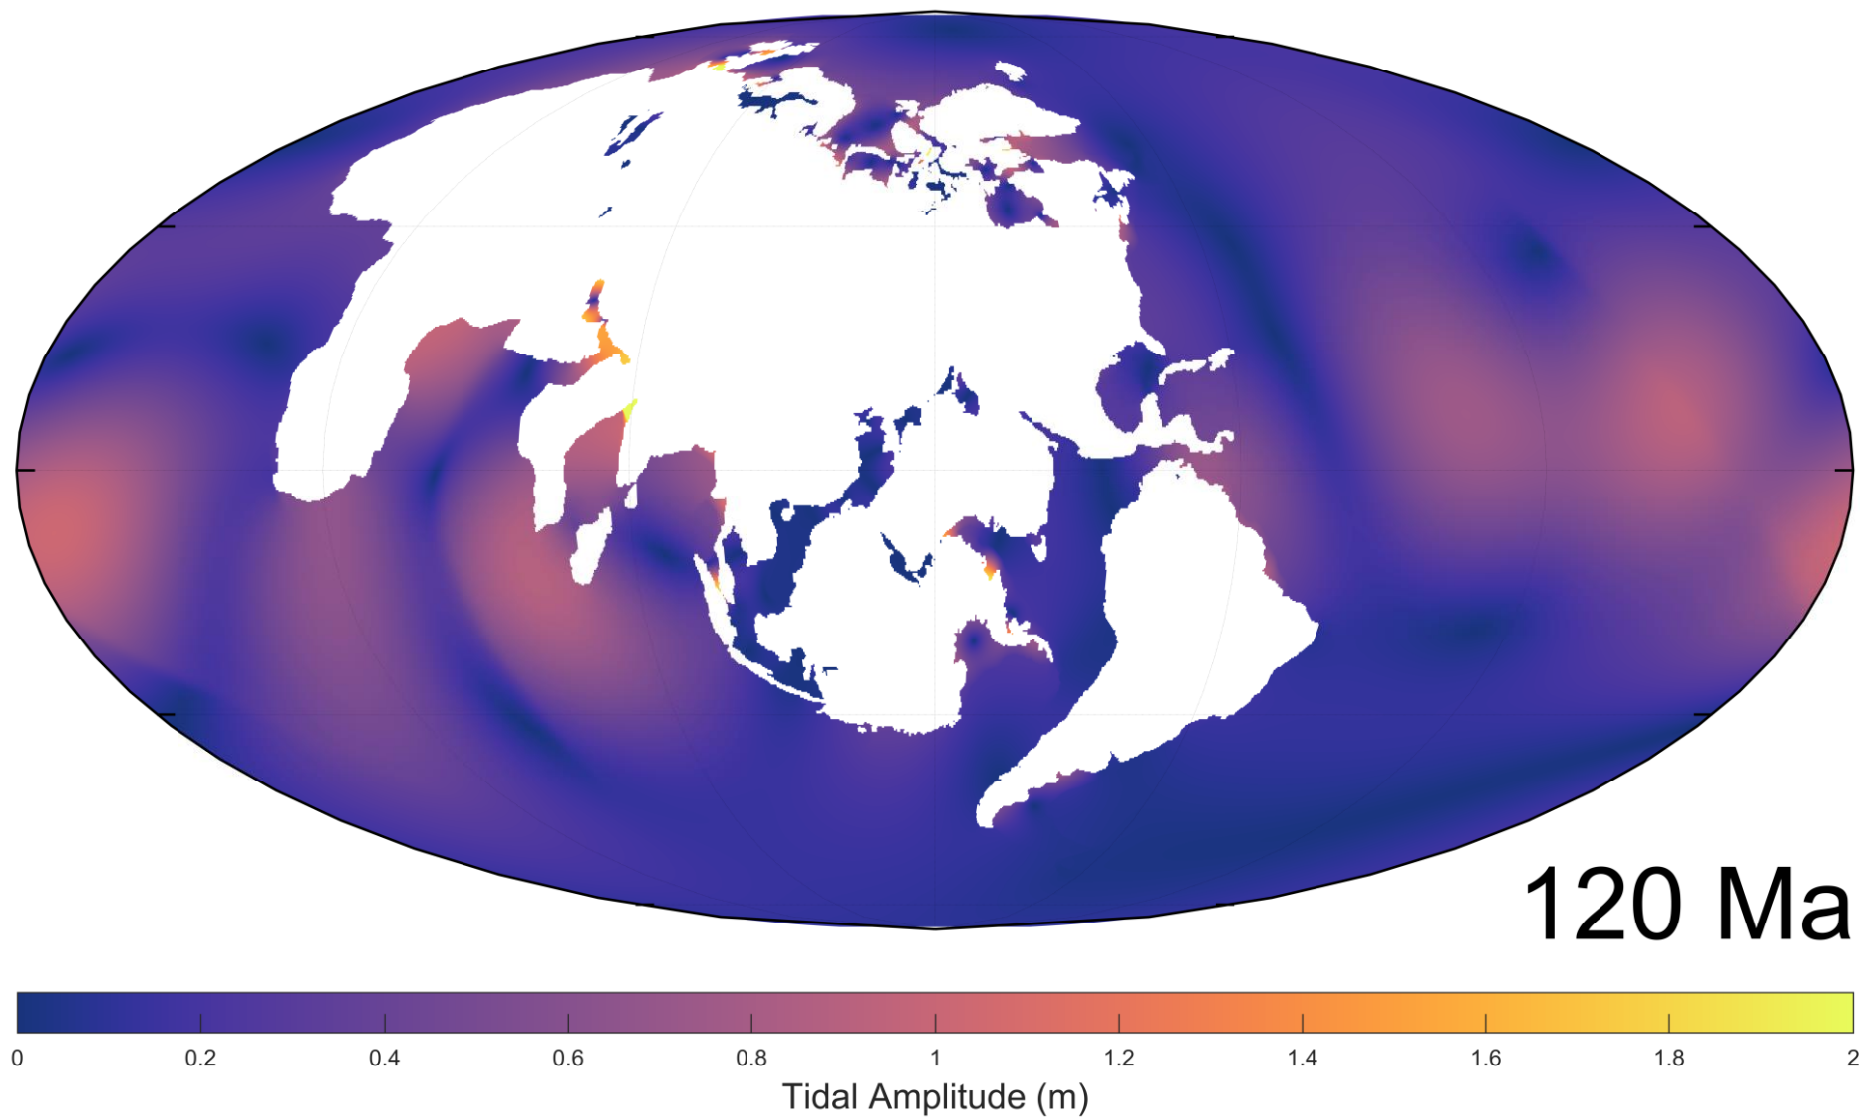

**Figure S2g: Global M<sub>2</sub> tide during the Novopangea scenario continued.**

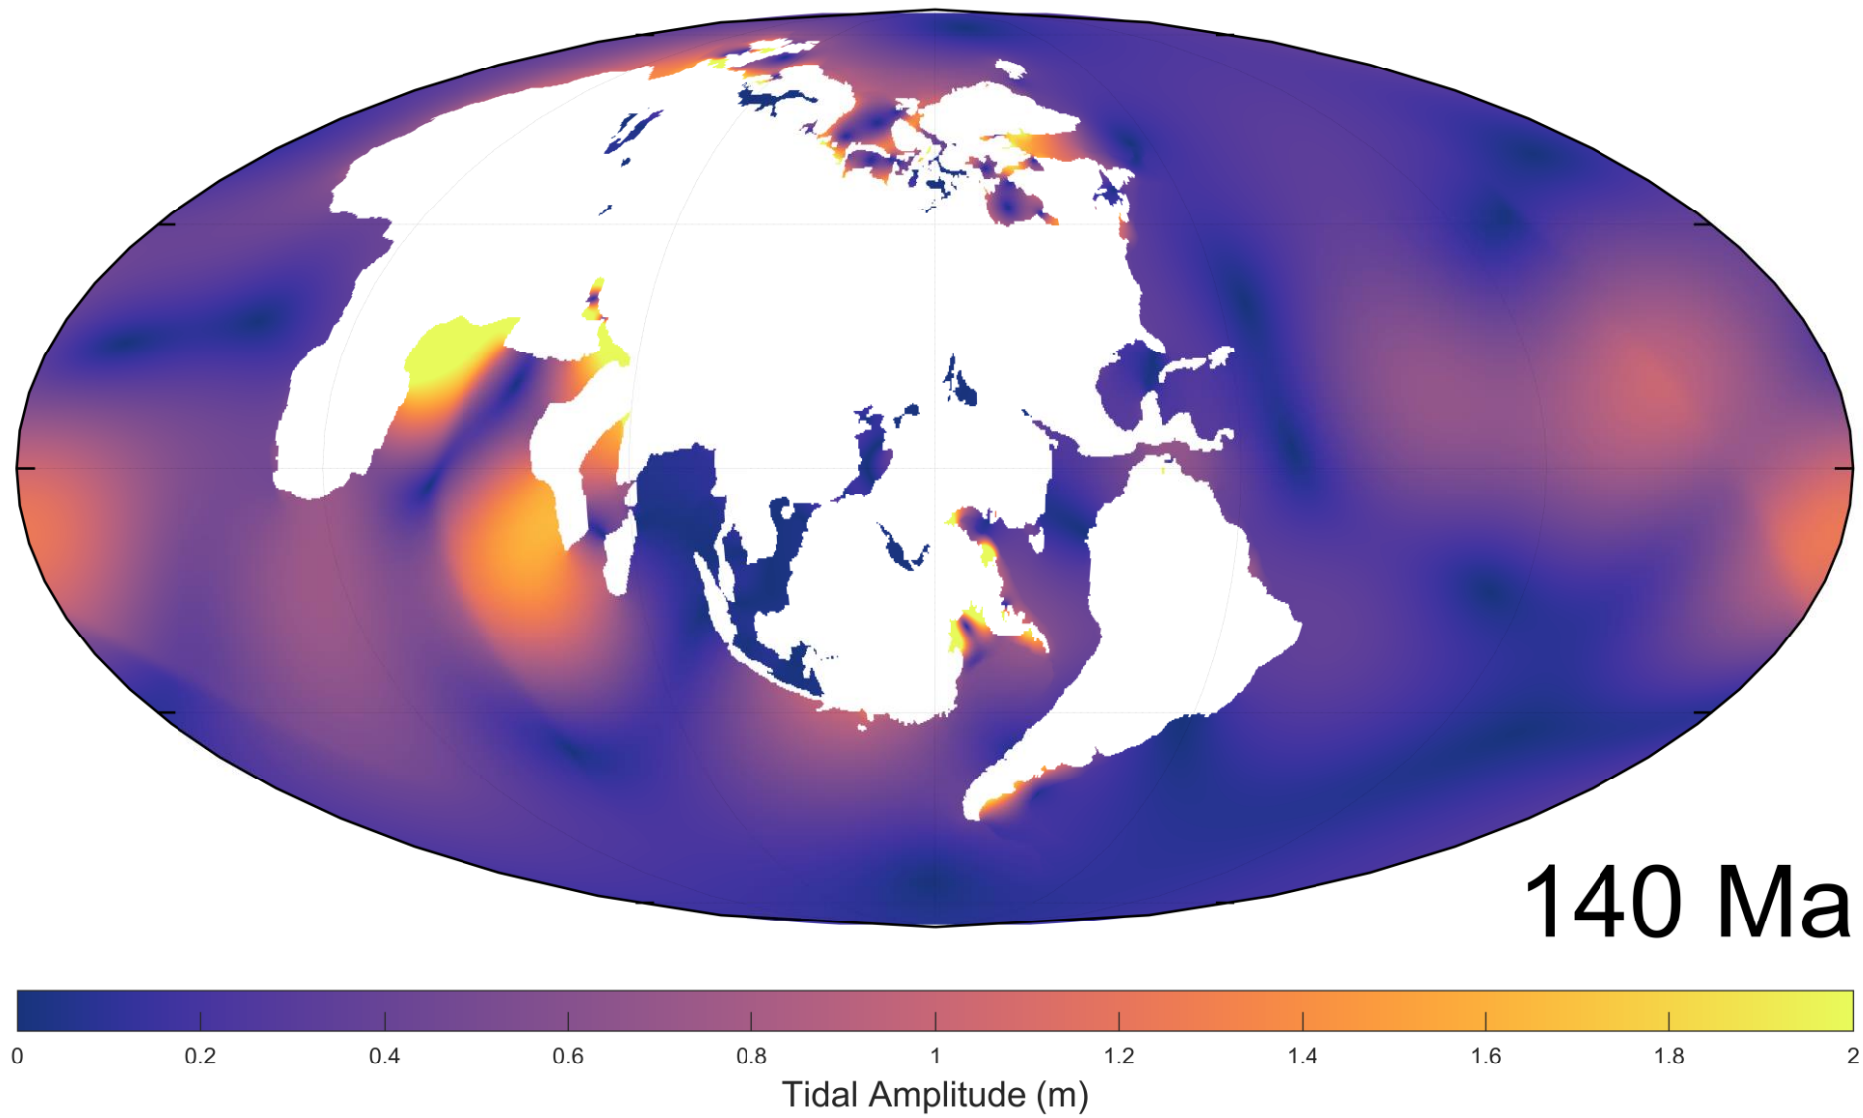

Figure S2h: Global M<sub>2</sub> tide during the Novopangea scenario continued.

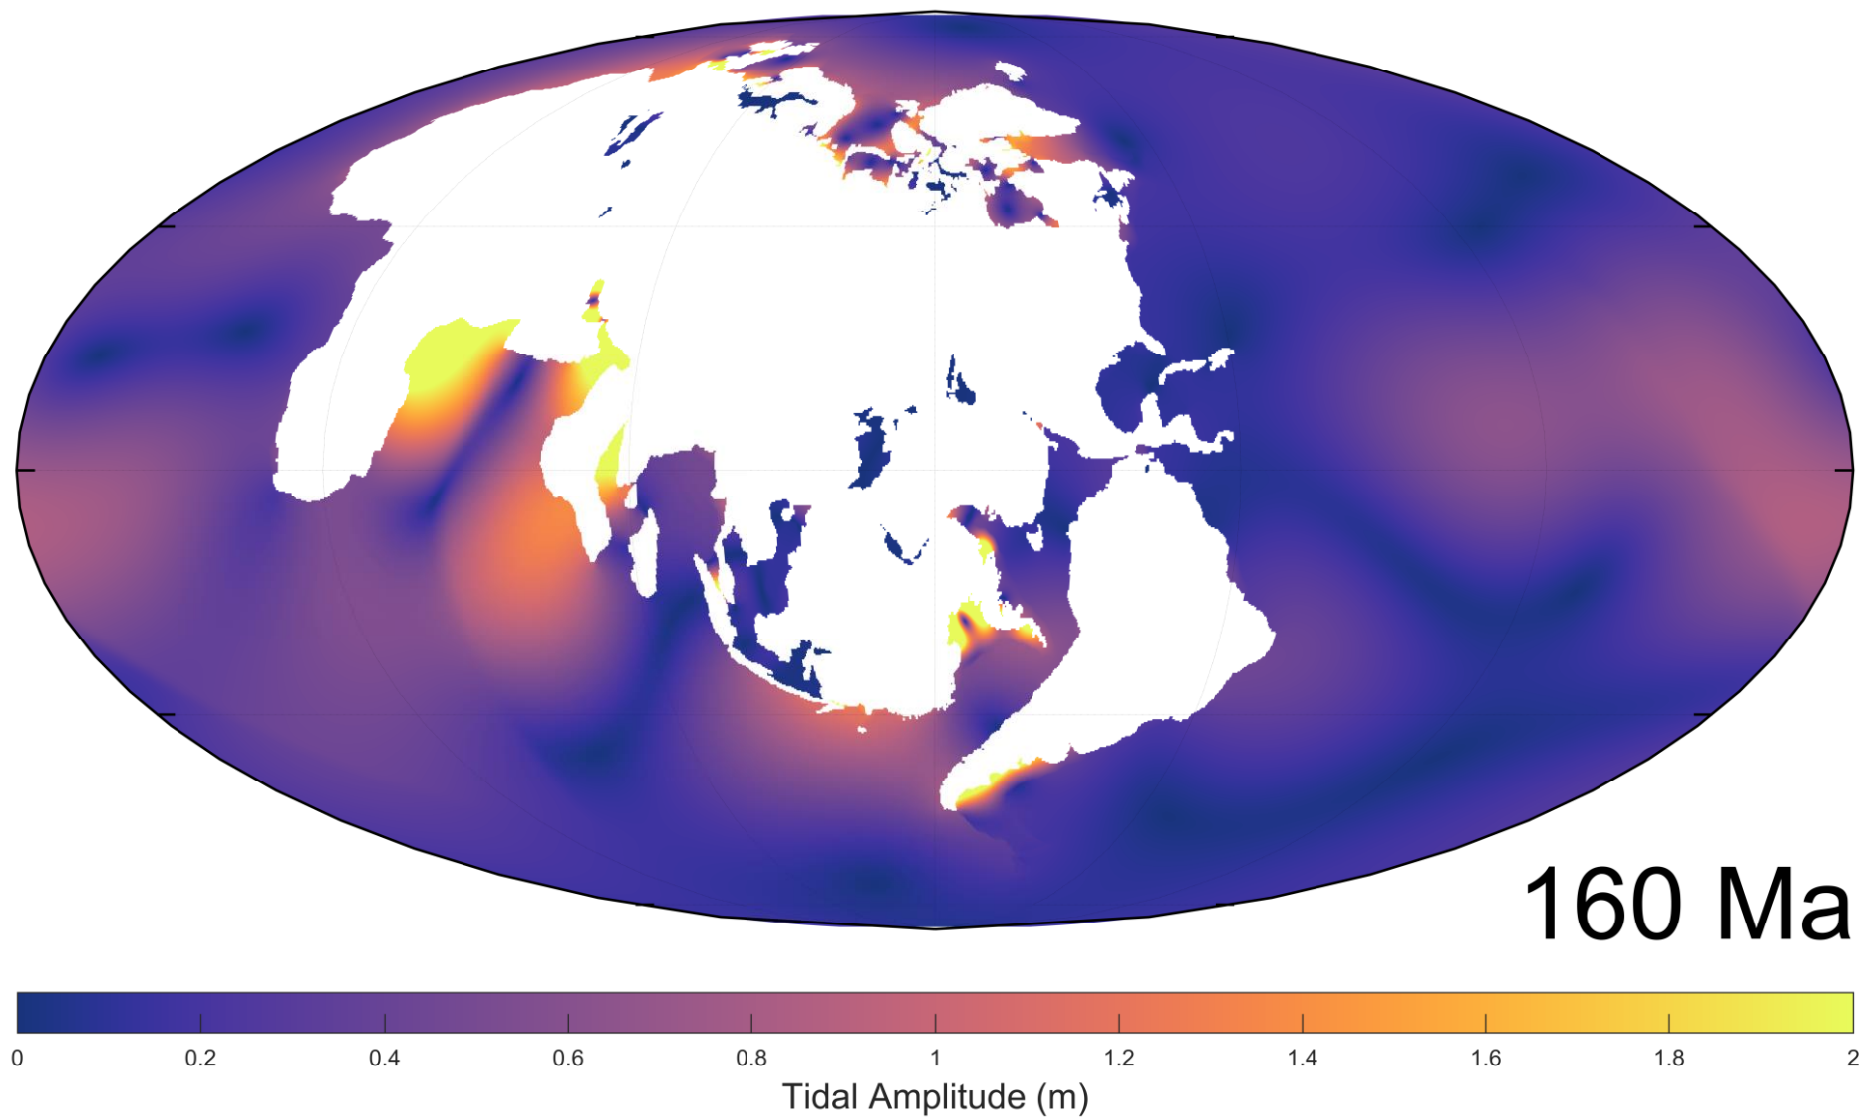

Figure S2i: Global M<sub>2</sub> tide during the Novopangea scenario continued.



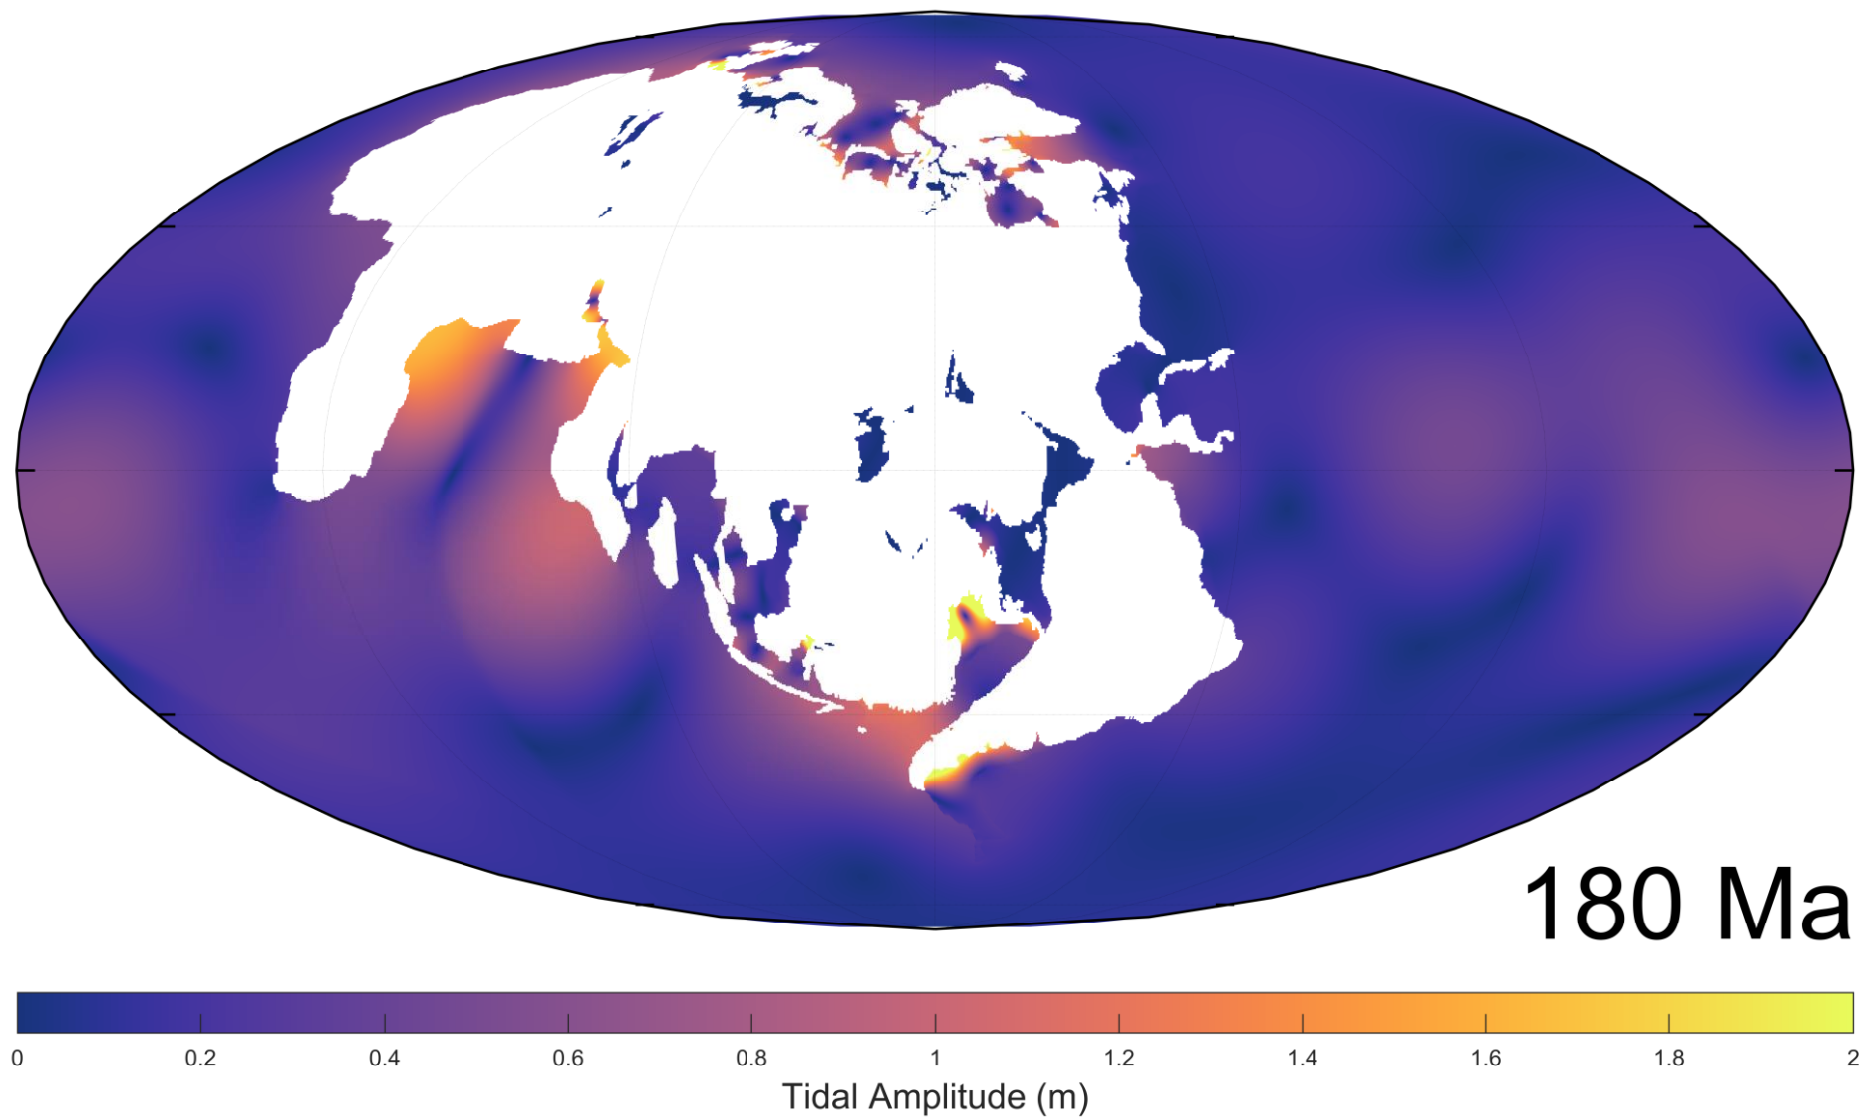

**Figure S2j: Global M<sub>2</sub> tide during the Novopangea scenario continued.**

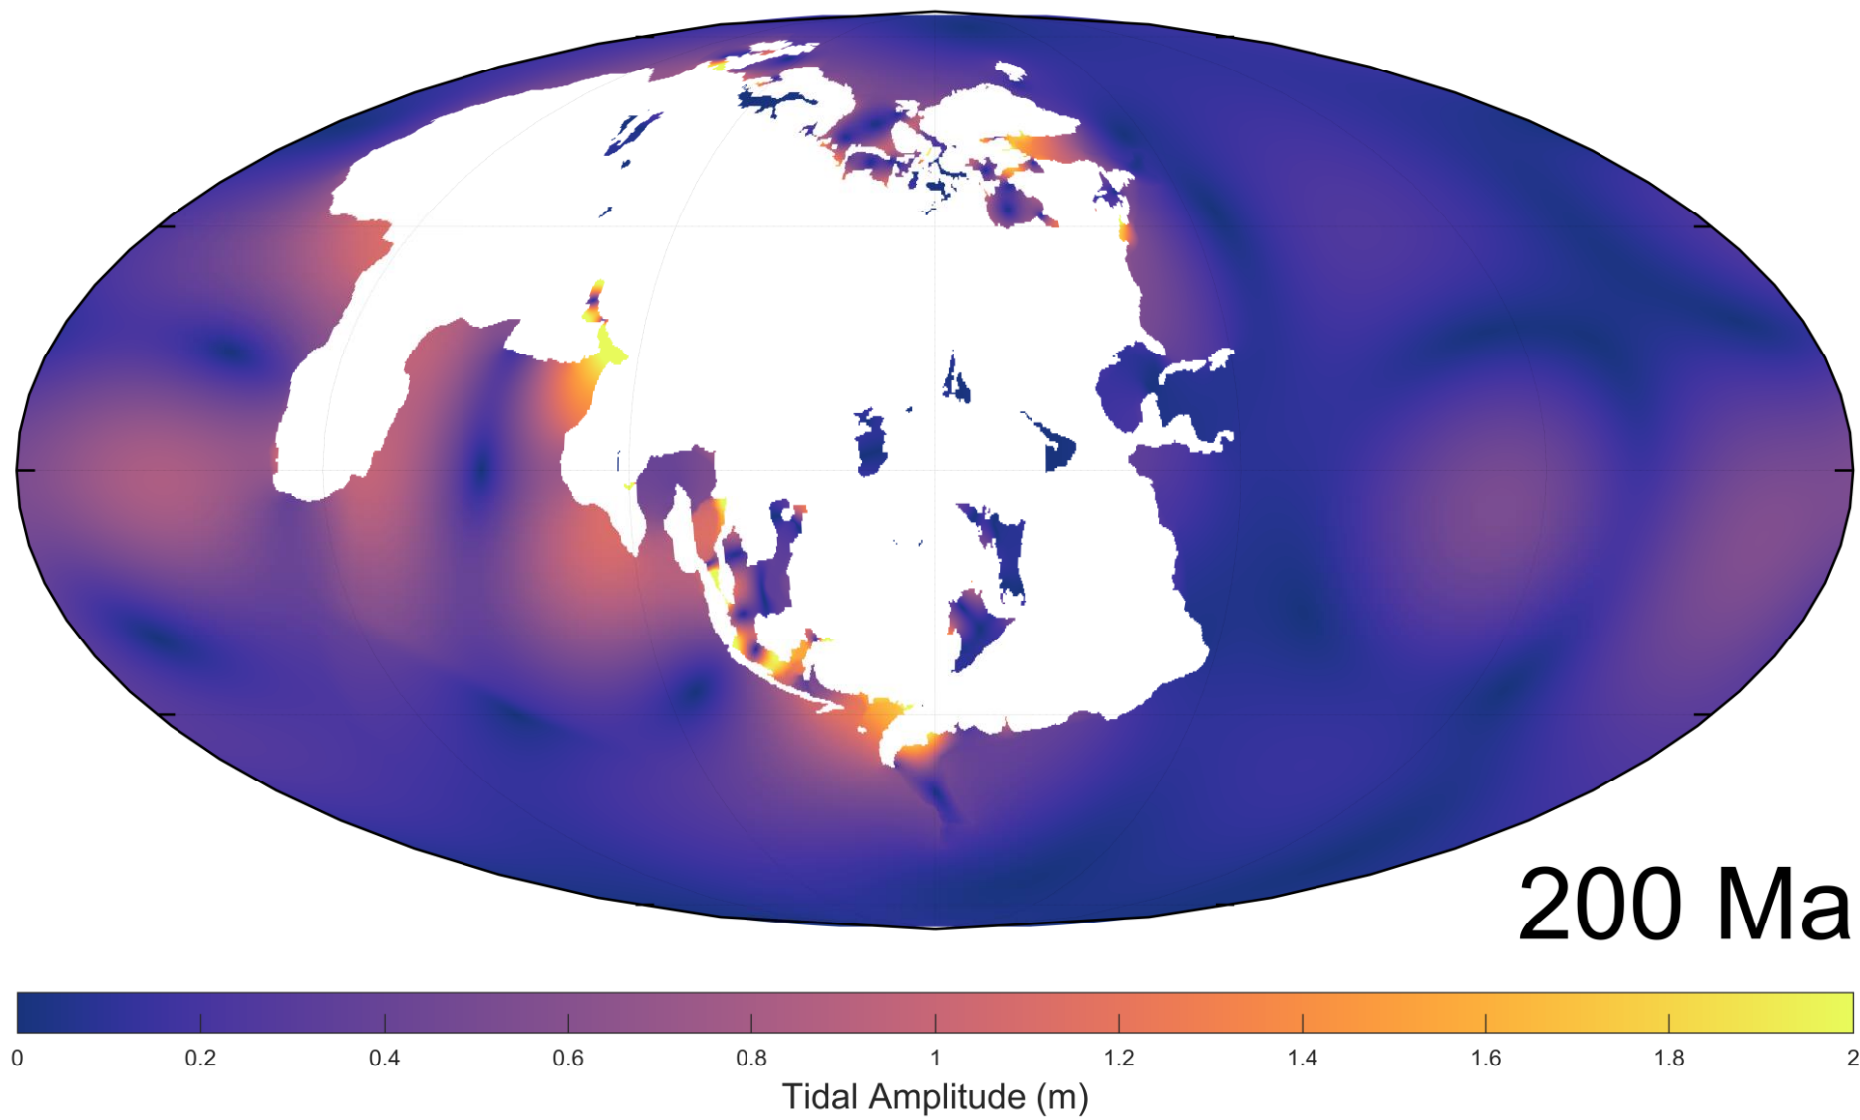

**Figure S2k: Global M<sub>2</sub> tide during the Novopangea scenario continued.**



**Figure S3a: Global  $M_2$  amplitudes for the present day (0 Ma) of the Aurica scenario. The colour scale saturates at 2 m.**

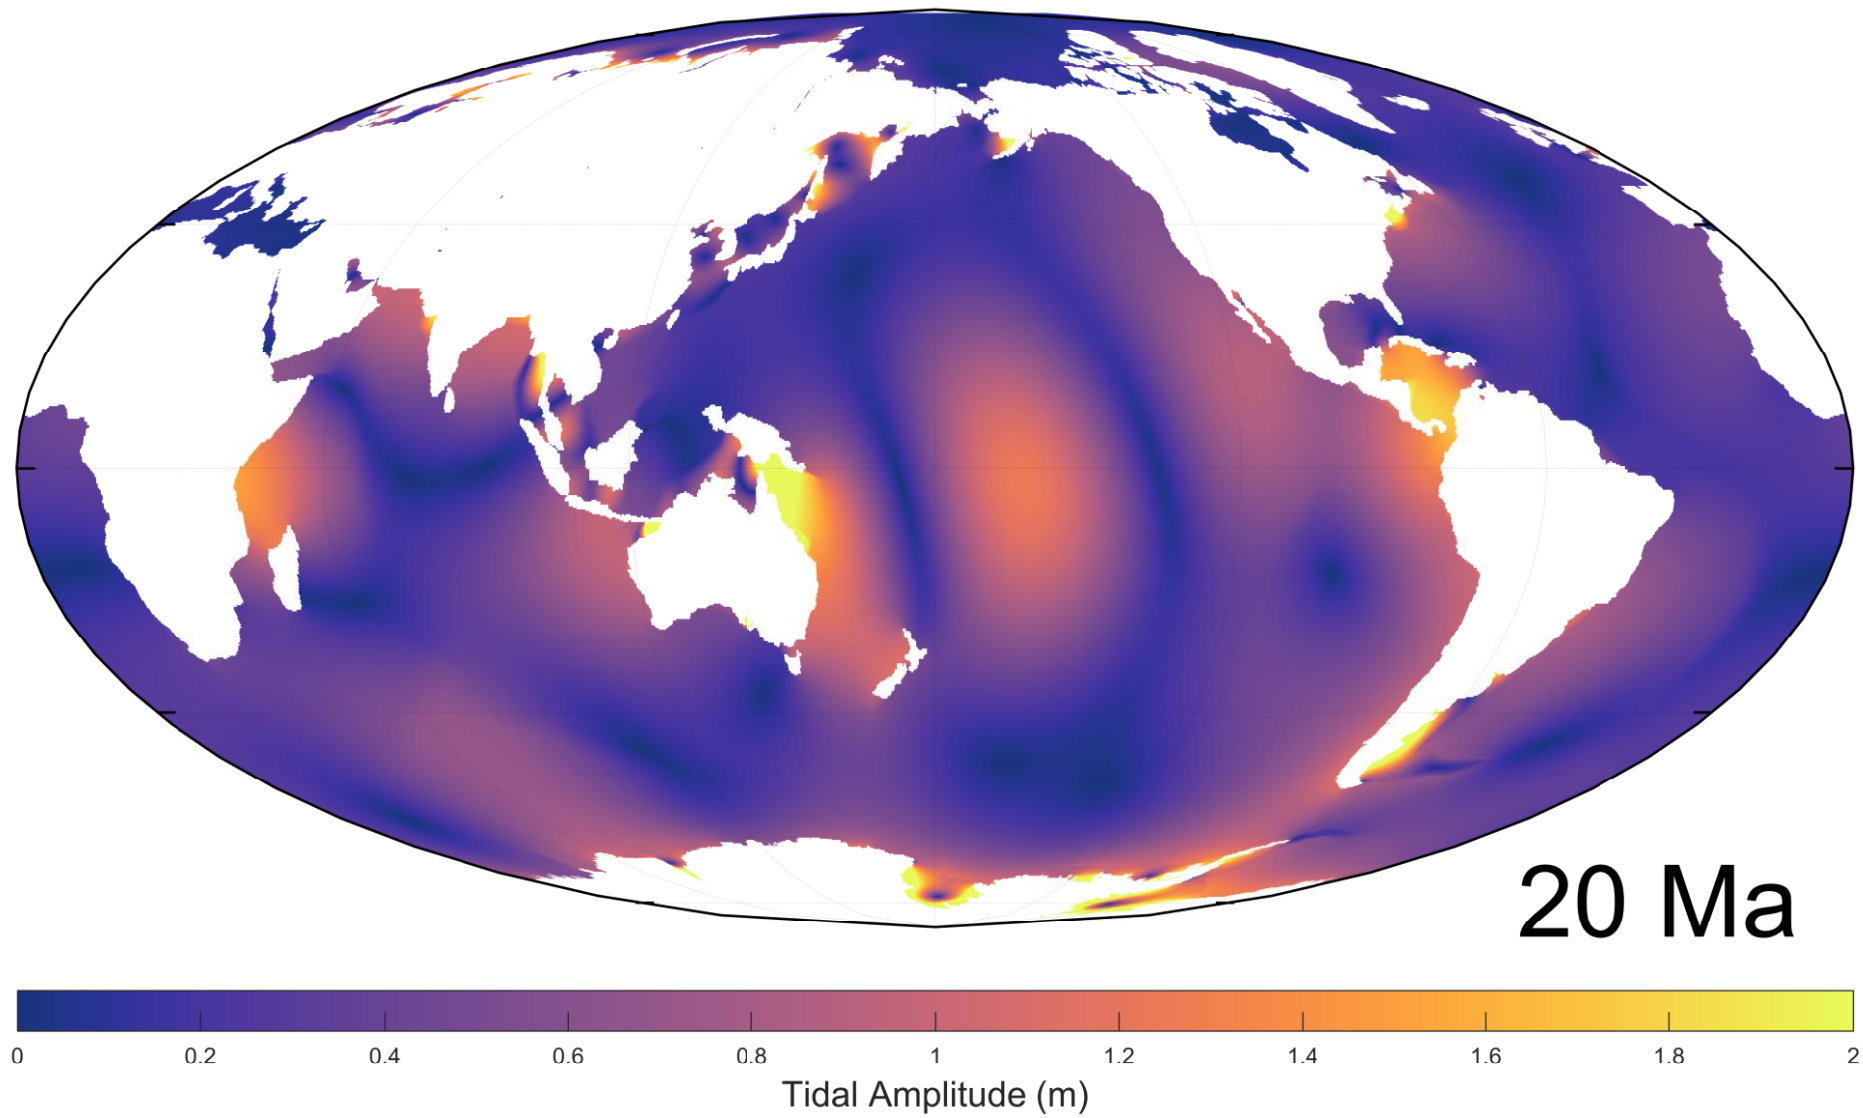

**Figure S3b: Global M<sub>2</sub> amplitudes the Aurica scenario continued.**

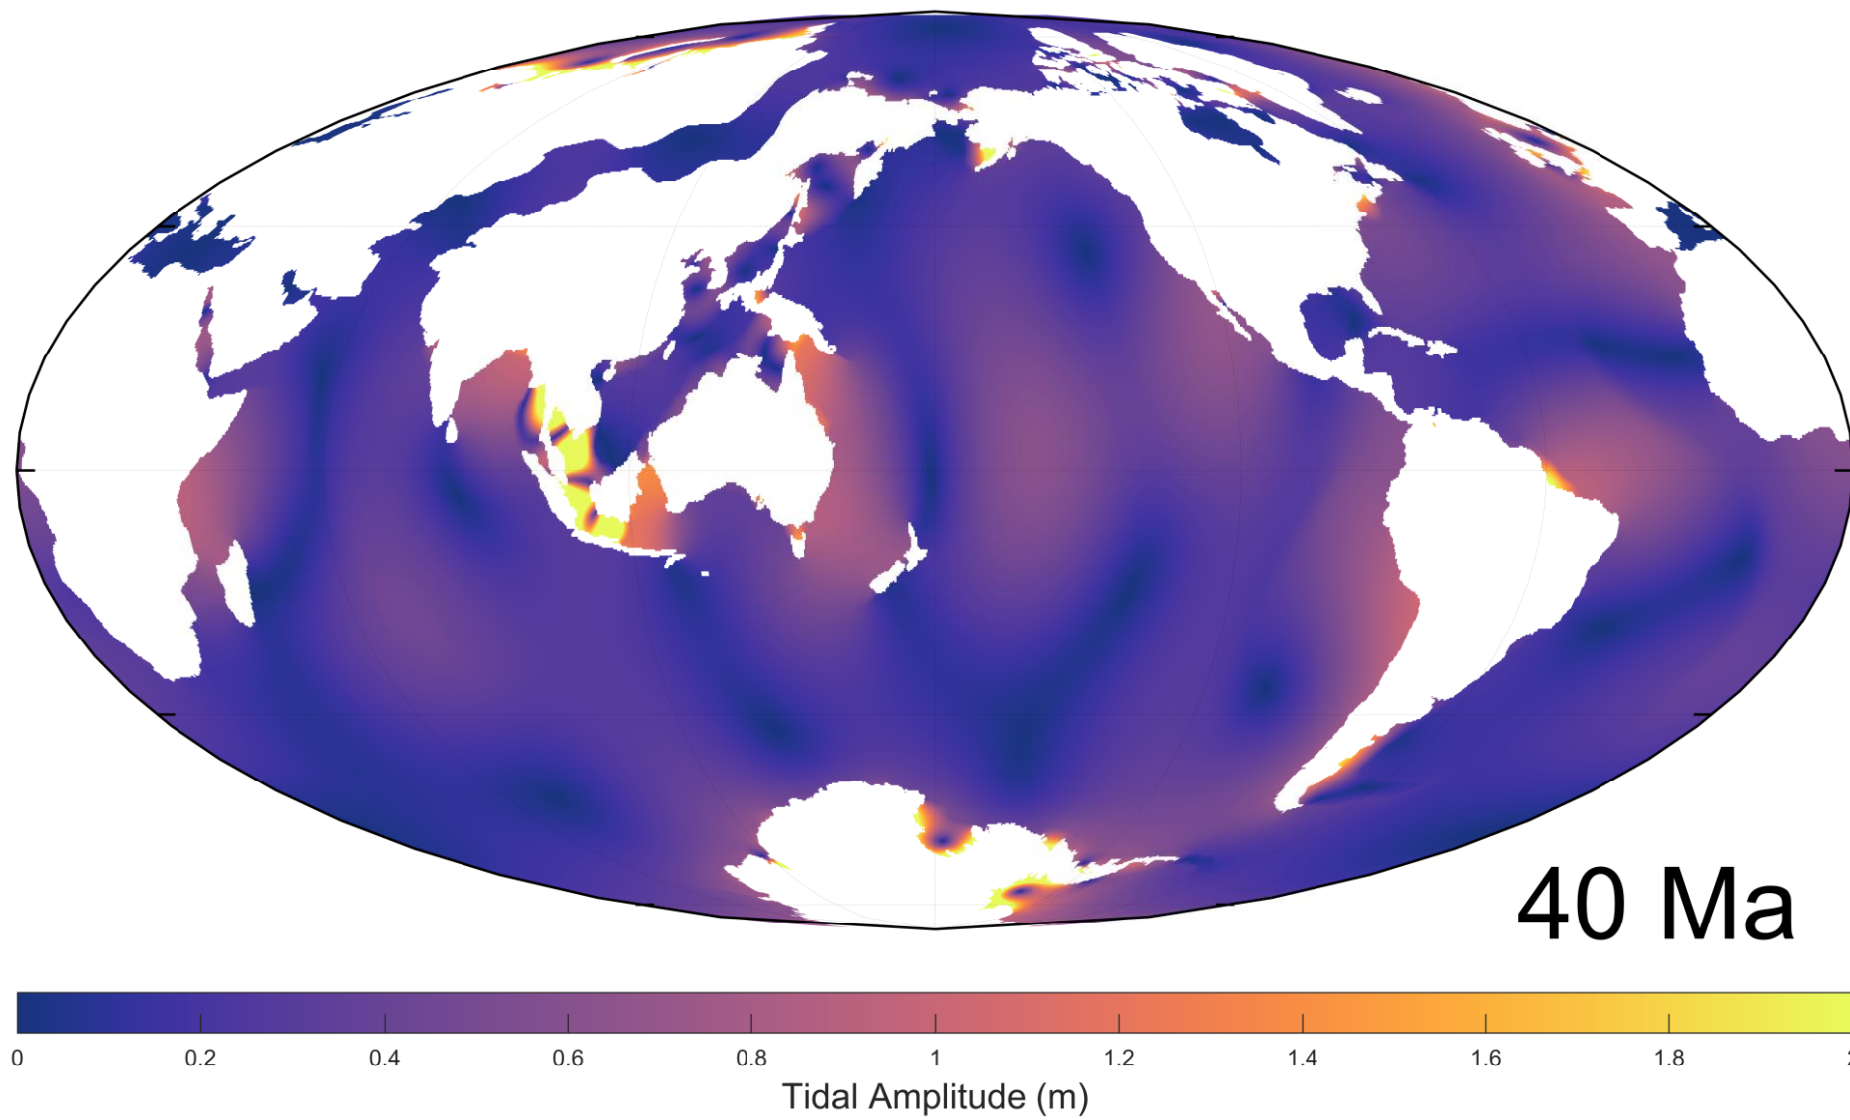

**Figure S3c: Global  $M_2$  amplitudes the Aurica scenario continued.**

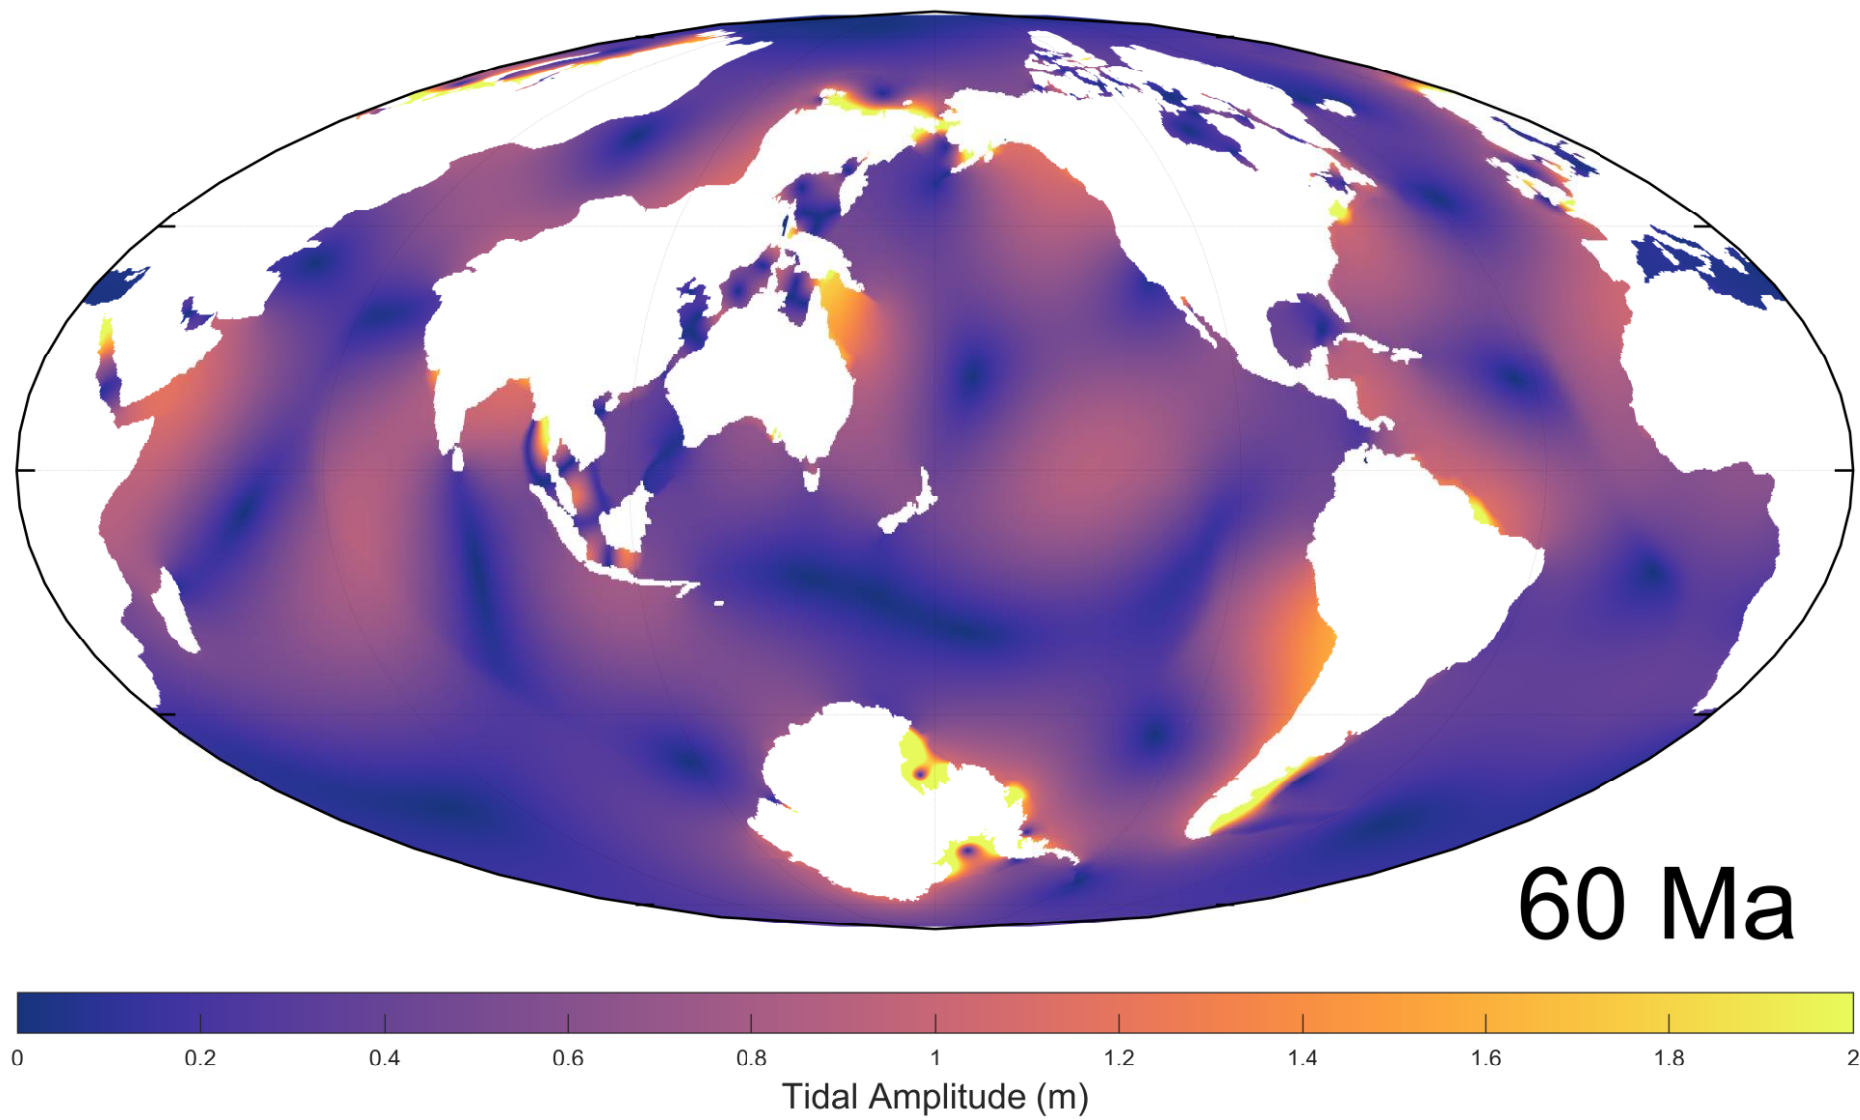

**Figure S3d: Global  $M_2$  amplitudes the Aurica scenario continued.**

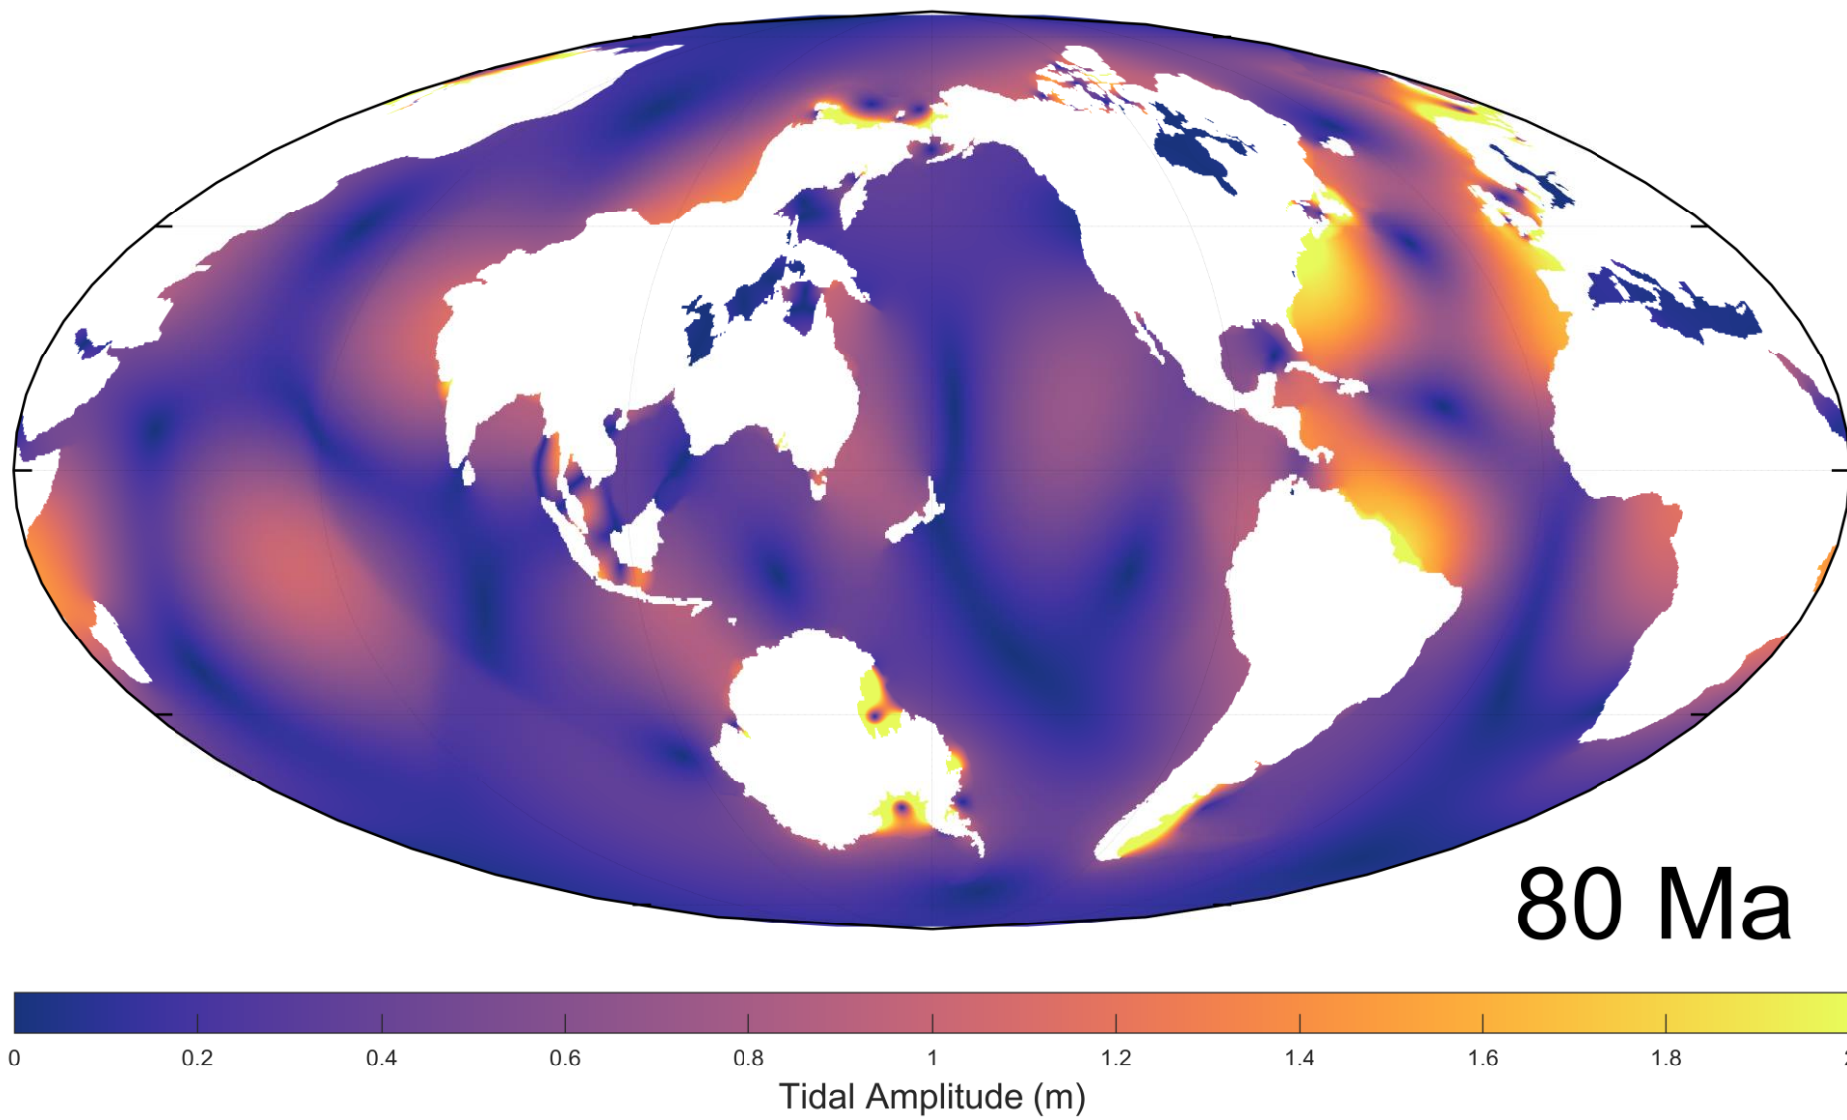

Figure S3e: Global M<sub>2</sub> amplitudes the Aurica scenario continued.

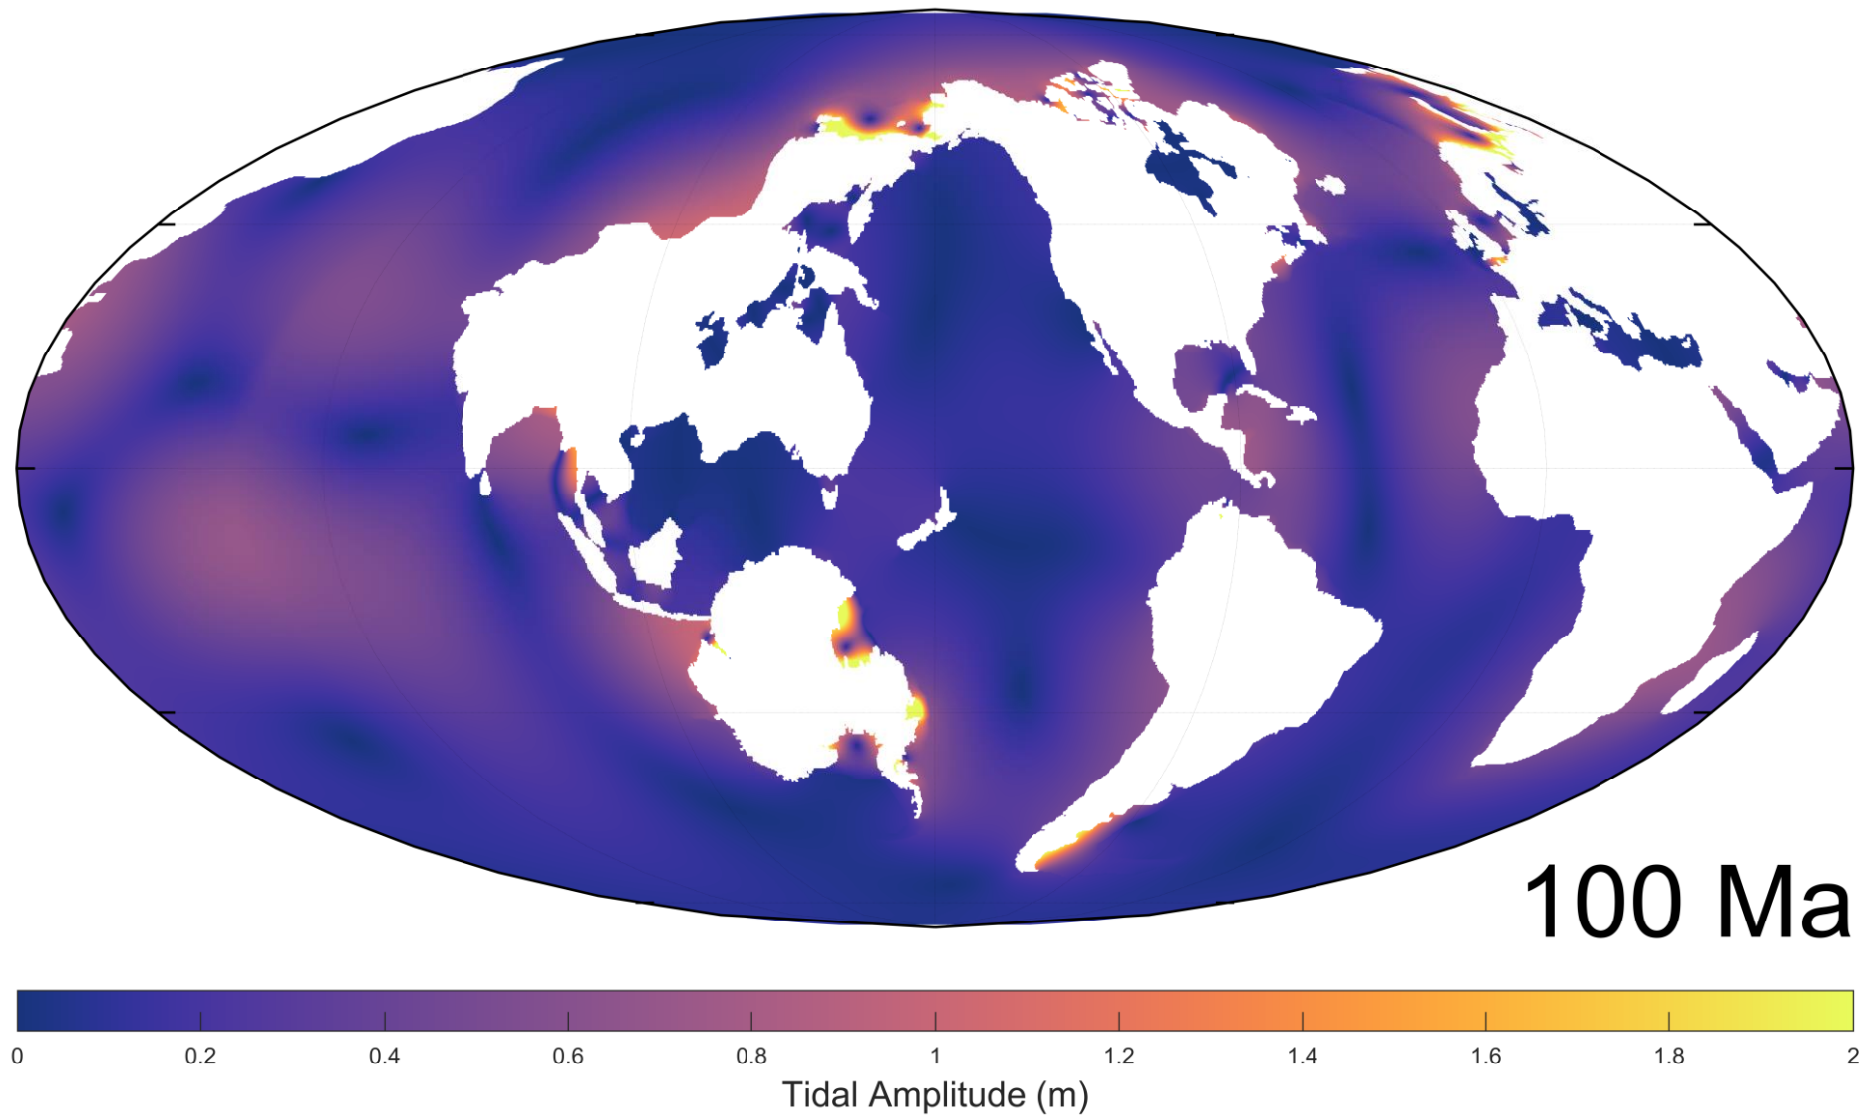

Figure S3f: Global  $M_2$  amplitudes the Aurica scenario continued.



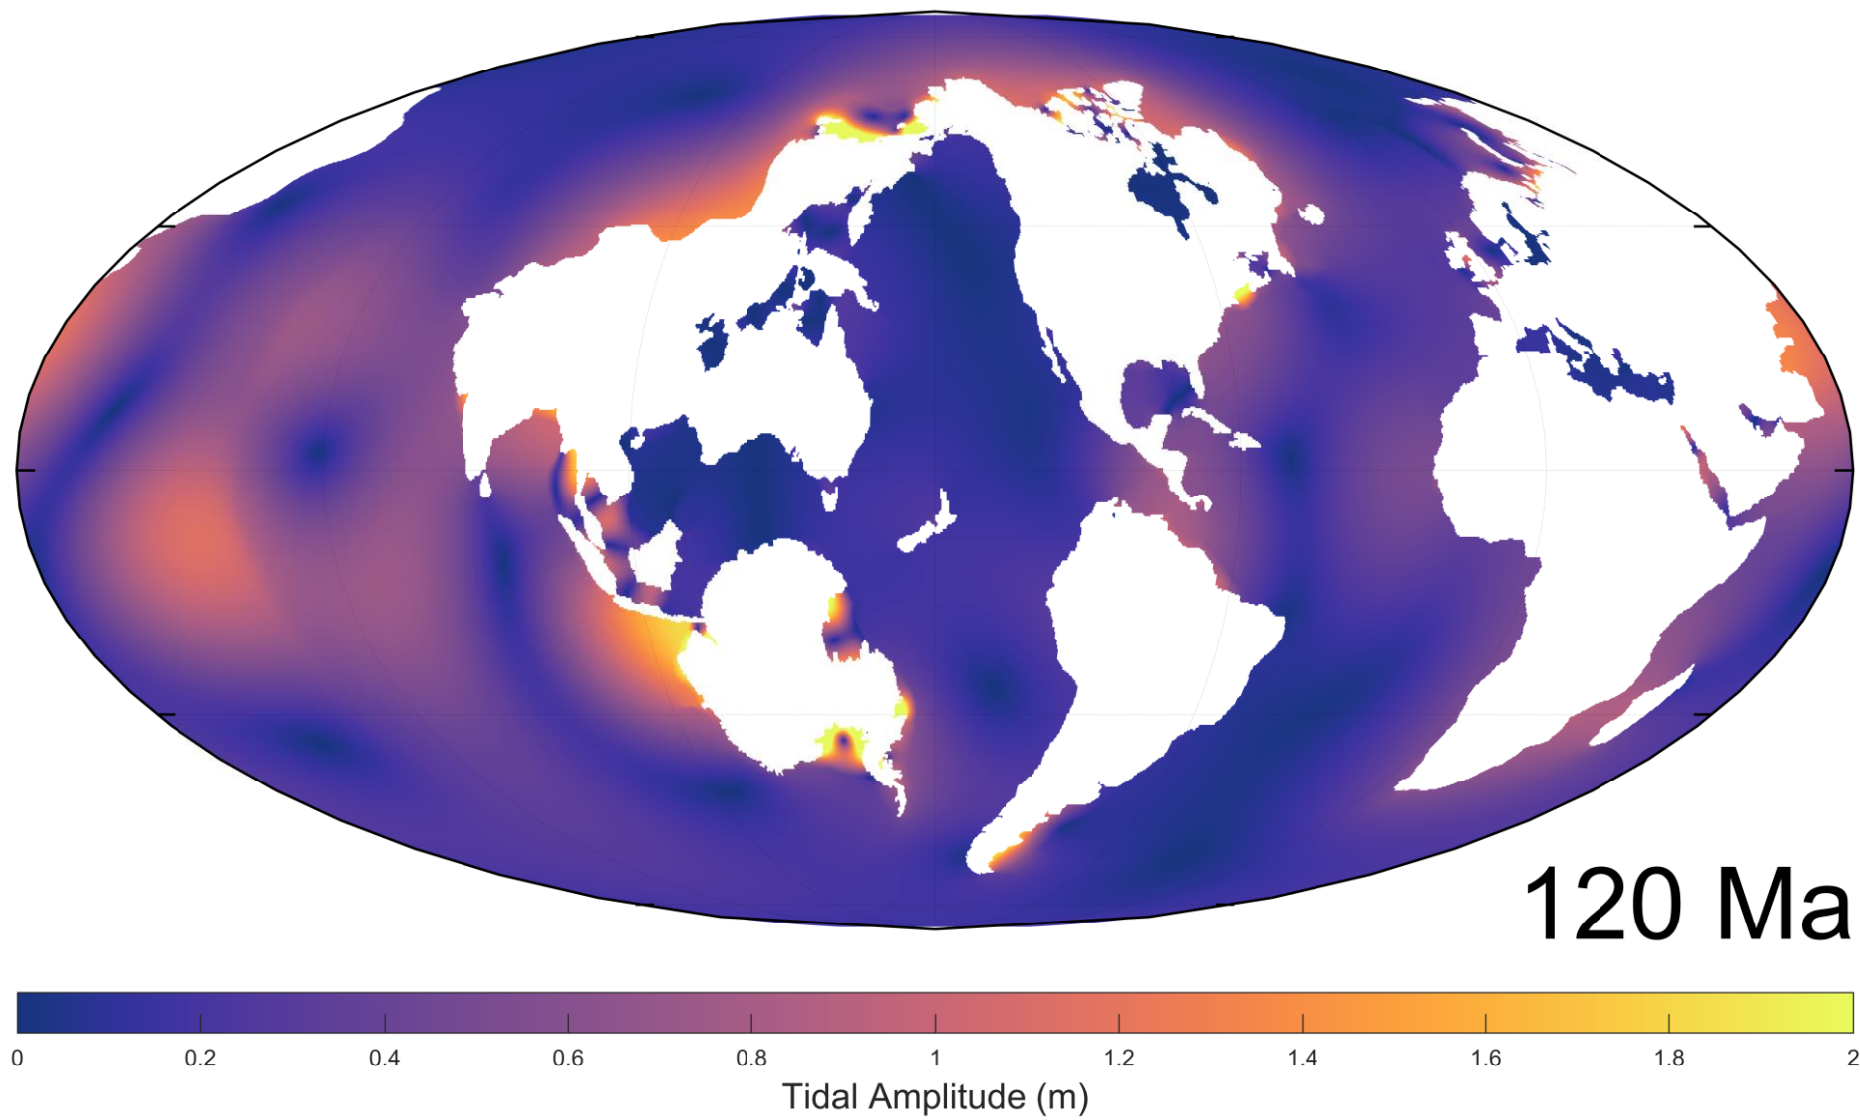

**Figure S3g: Global M<sub>2</sub> amplitudes the Aurica scenario continued.**

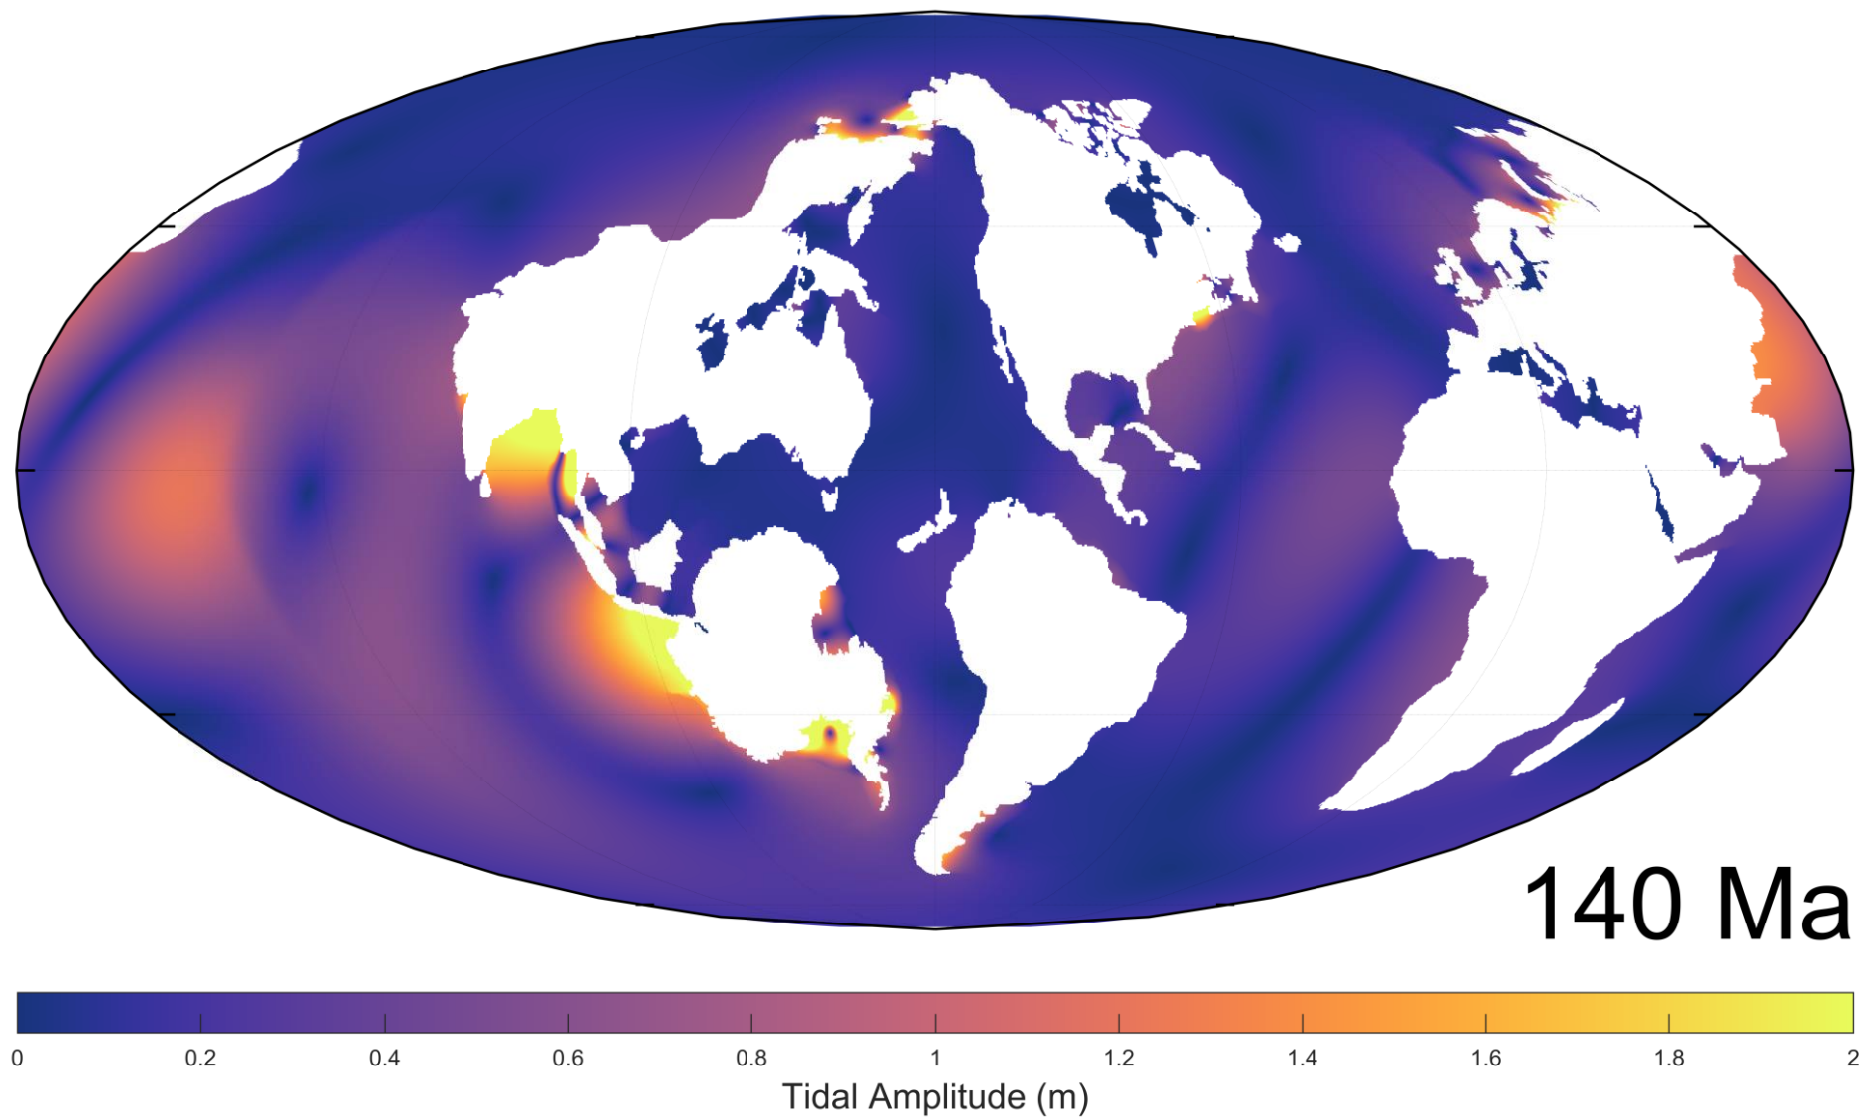

Figure S3h: Global  $M_2$  amplitudes the Aurica scenario continued.

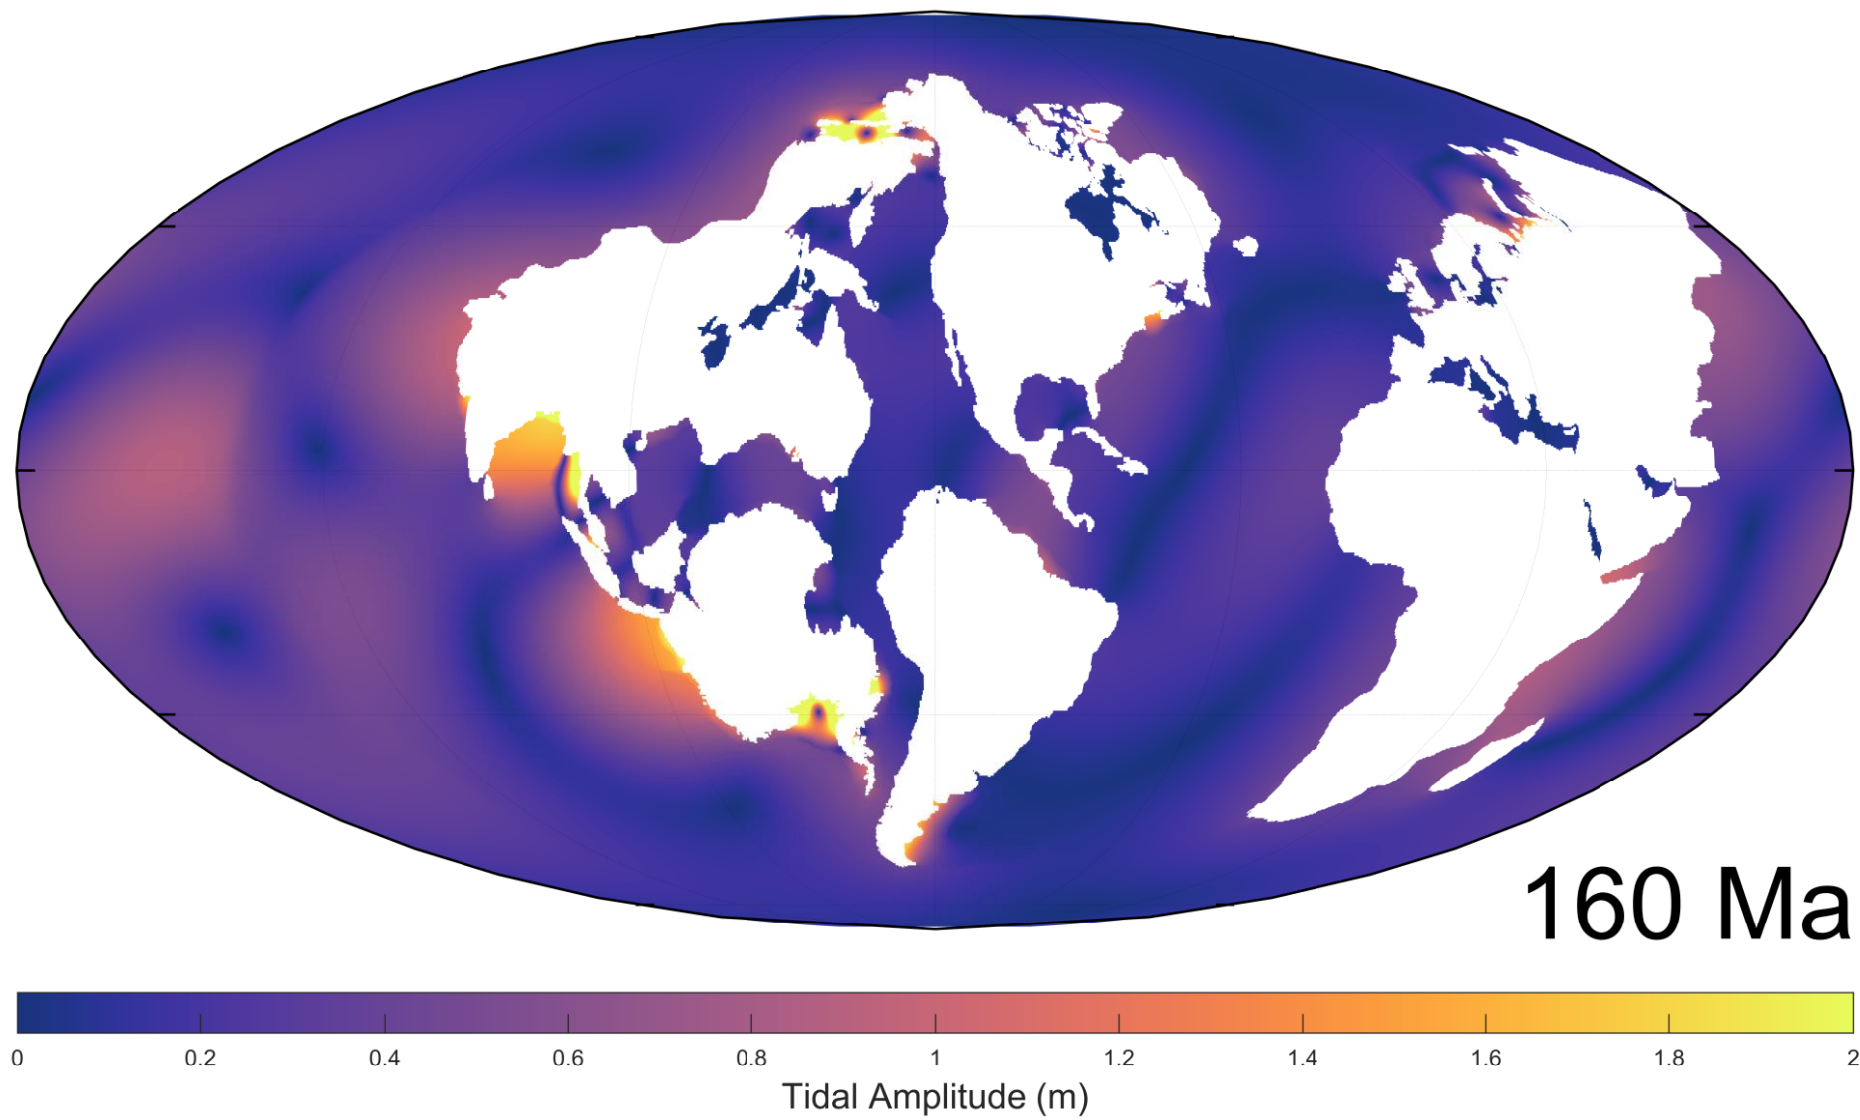

Figure S3i: Global  $M_2$  amplitudes the Aurica scenario continued.

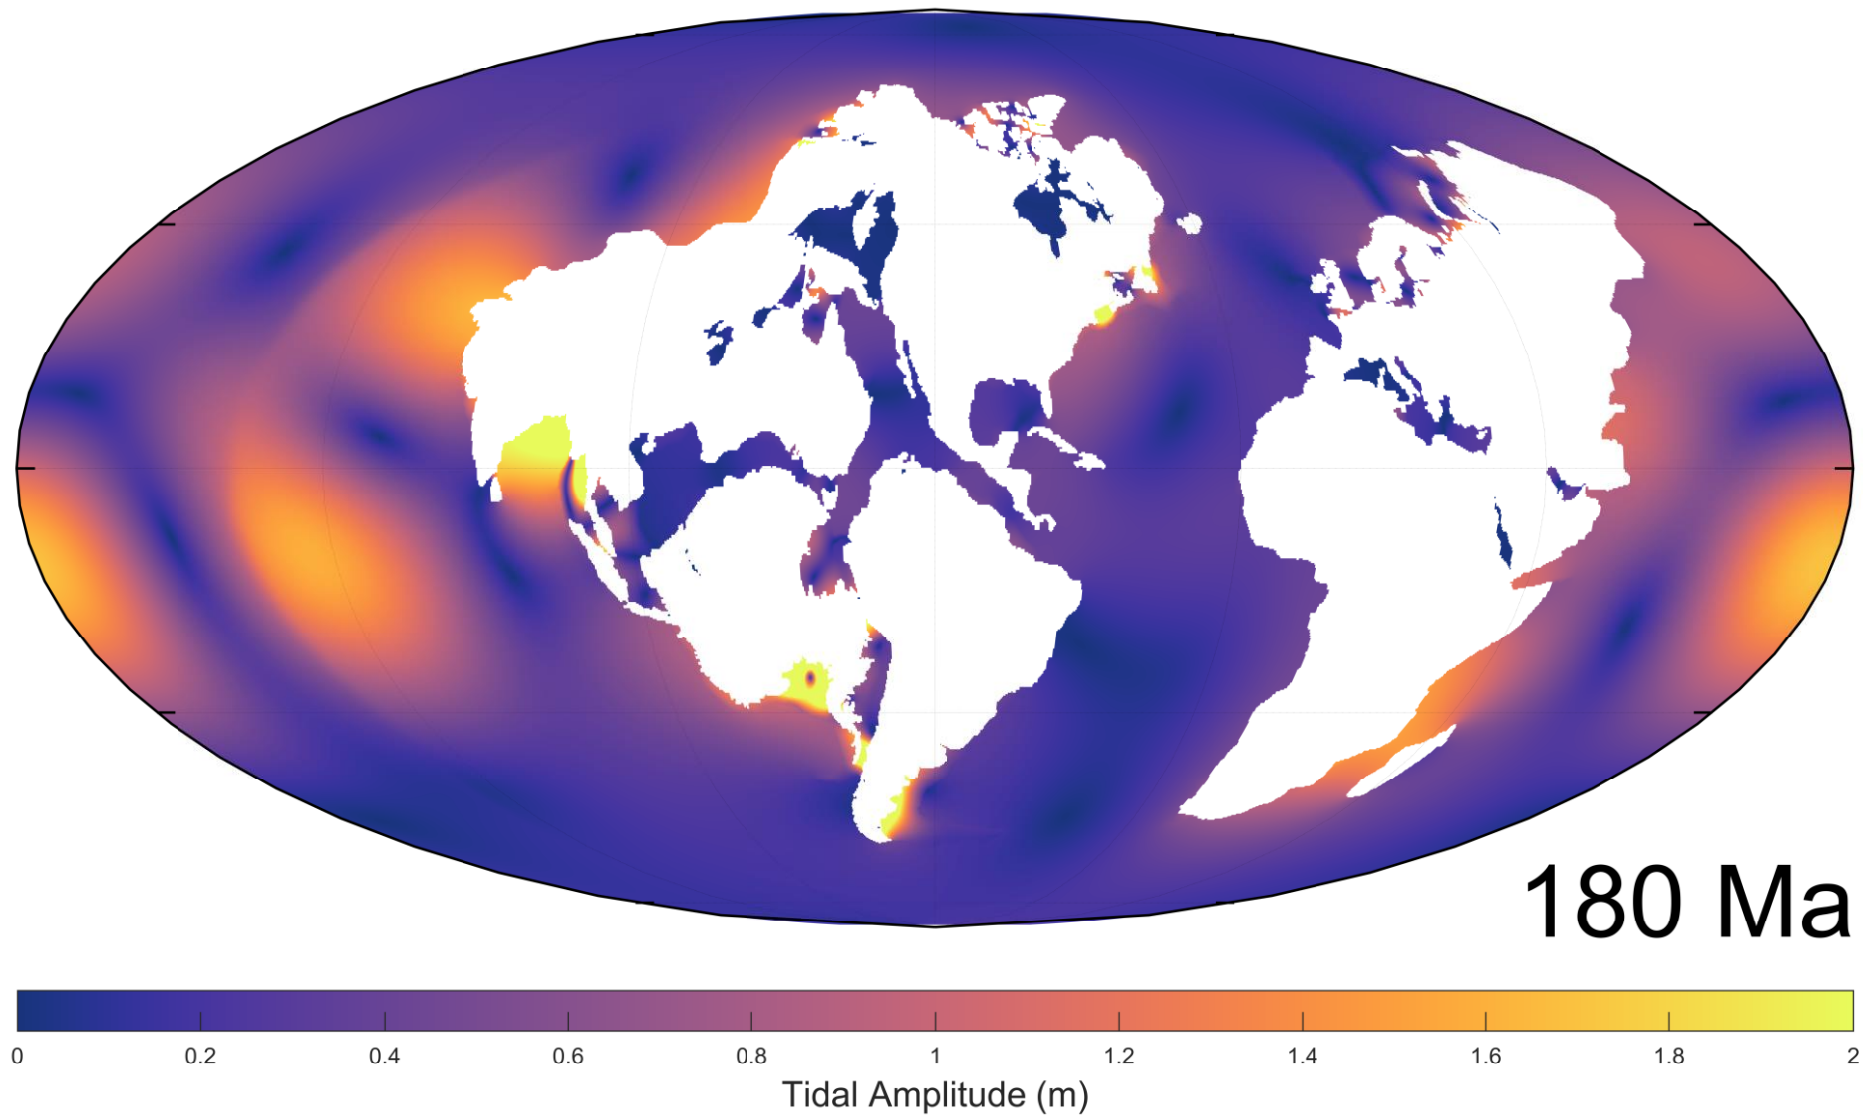

Figure S3j: Global M<sub>2</sub> amplitudes the Aurica scenario continued.

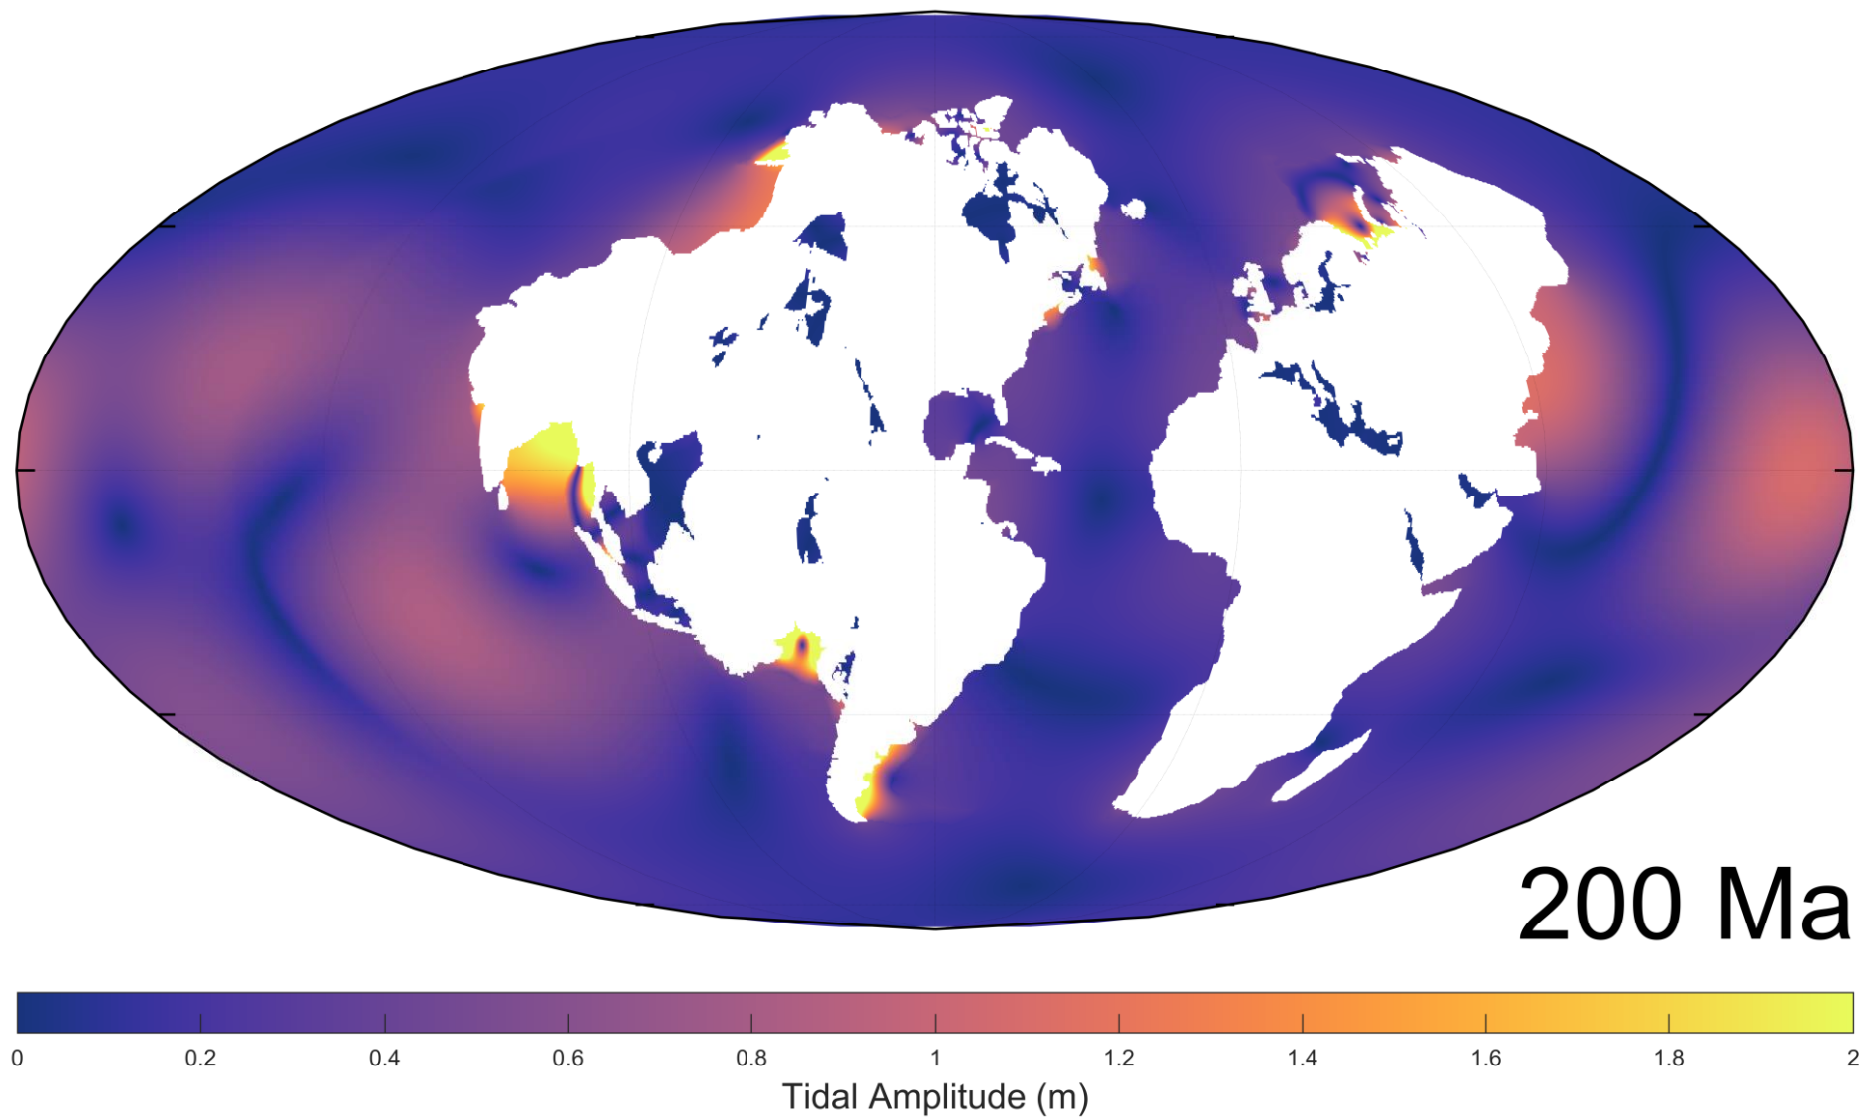

Figure S3k: Global  $M_2$  amplitudes the Aurica scenario continued.

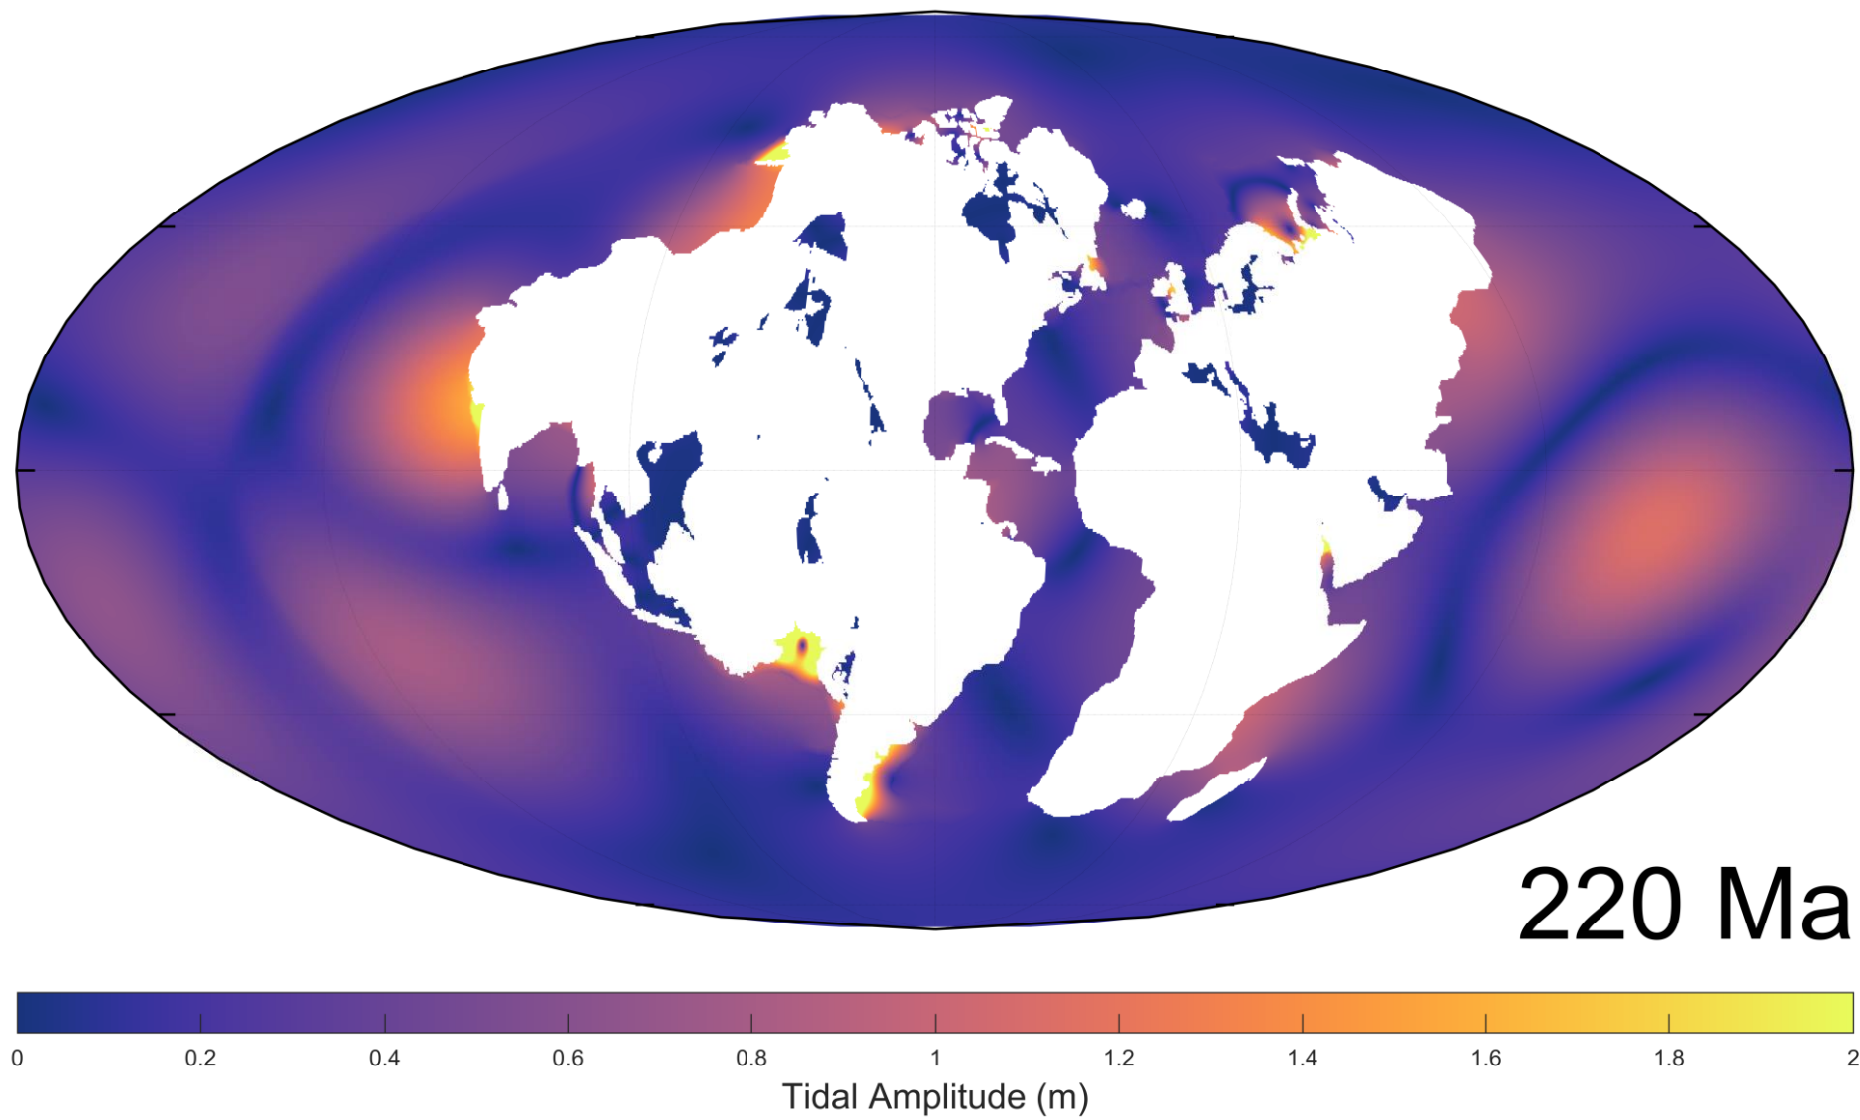

Figure S3I: Global  $M_2$  amplitudes the Aurica scenario continued.

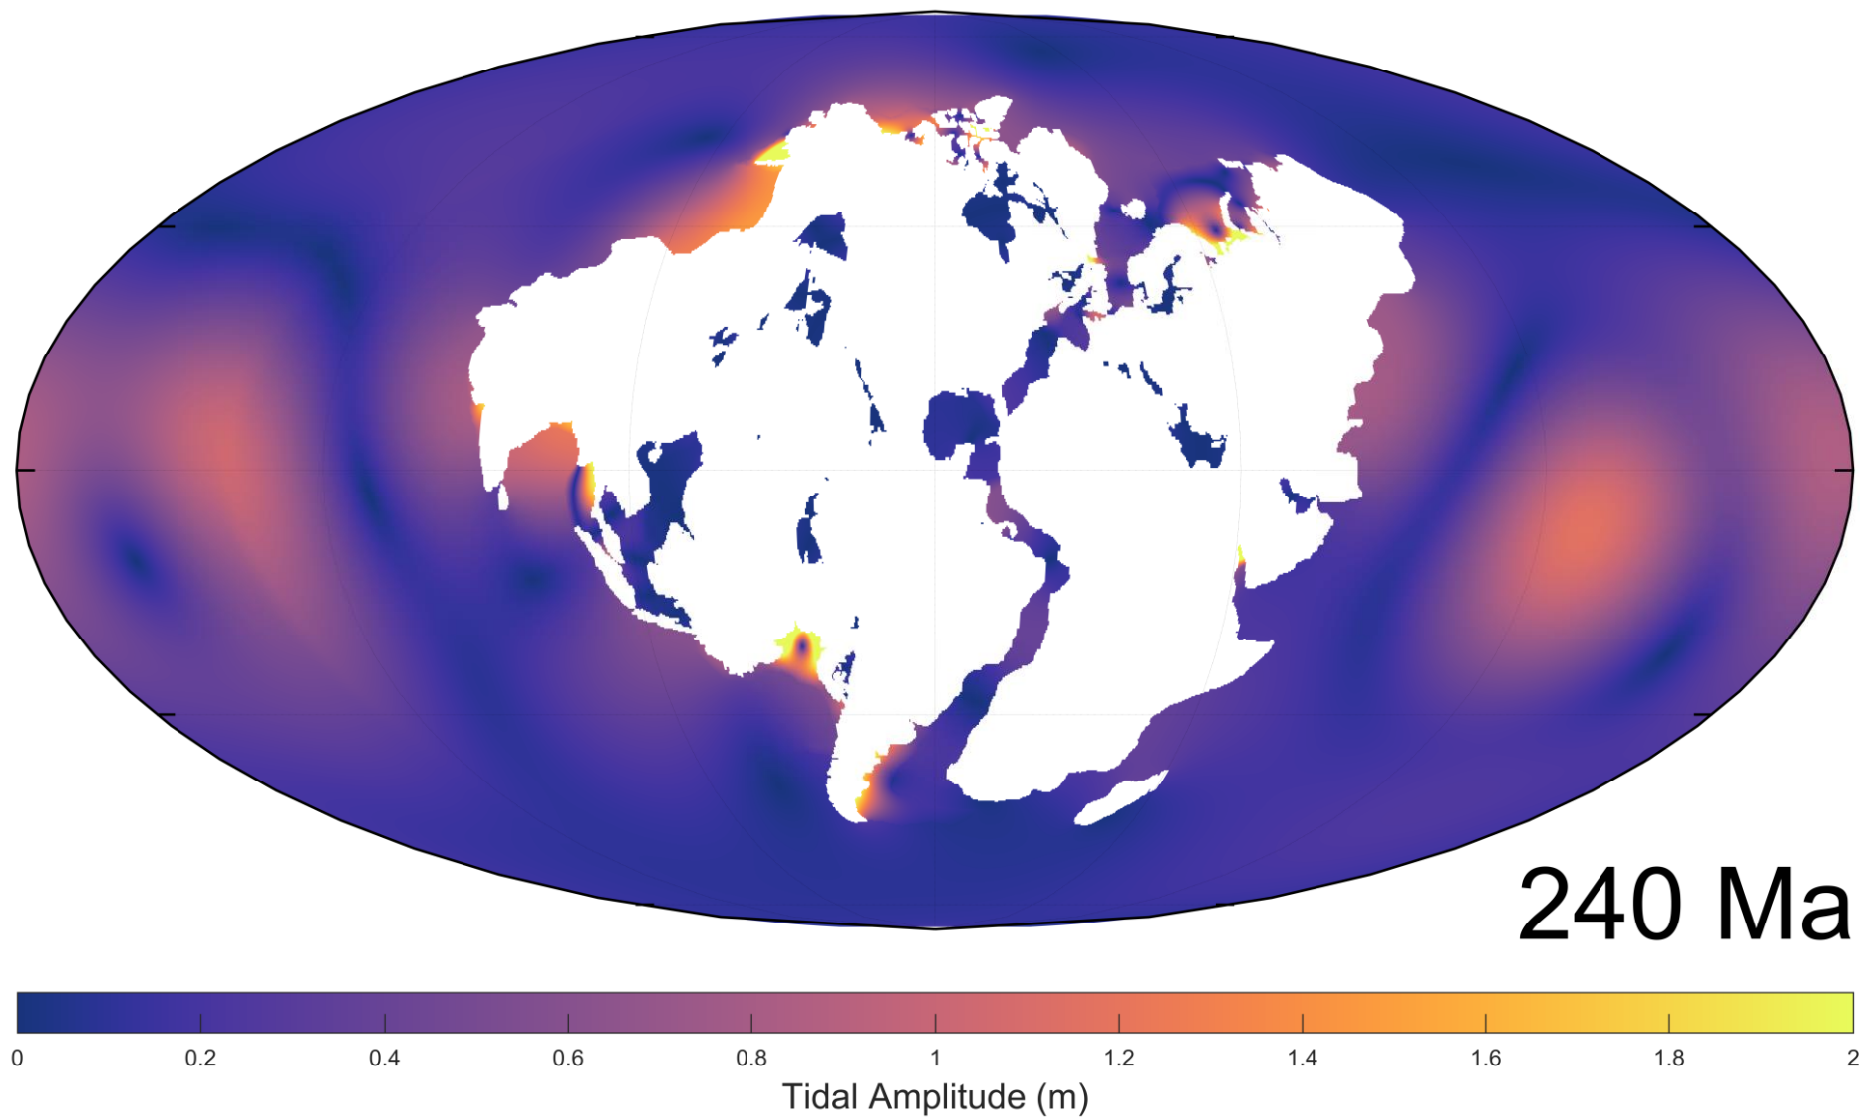

Figure S3m: Global M<sub>2</sub> amplitudes the Aurica scenario continued.

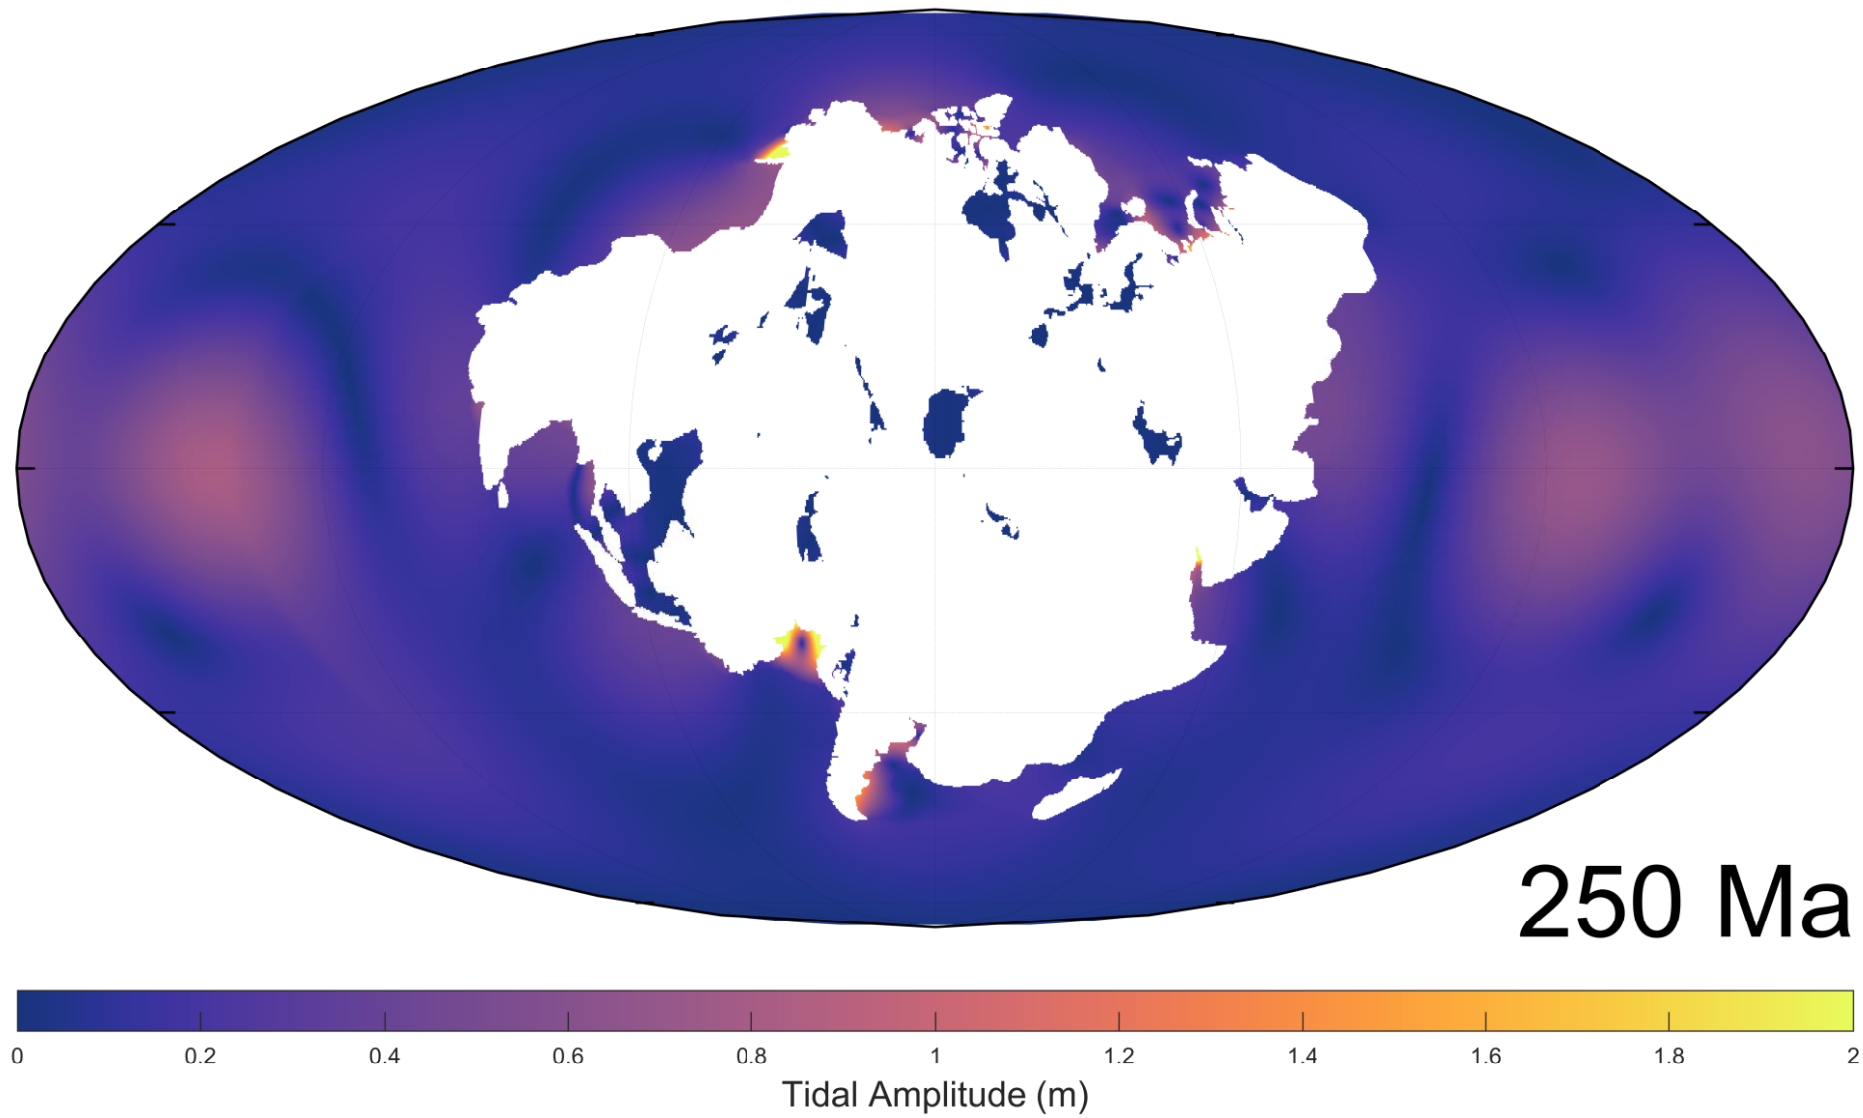

**Figure S3n: Global M<sub>2</sub> amplitudes the Aurica scenario continued.**



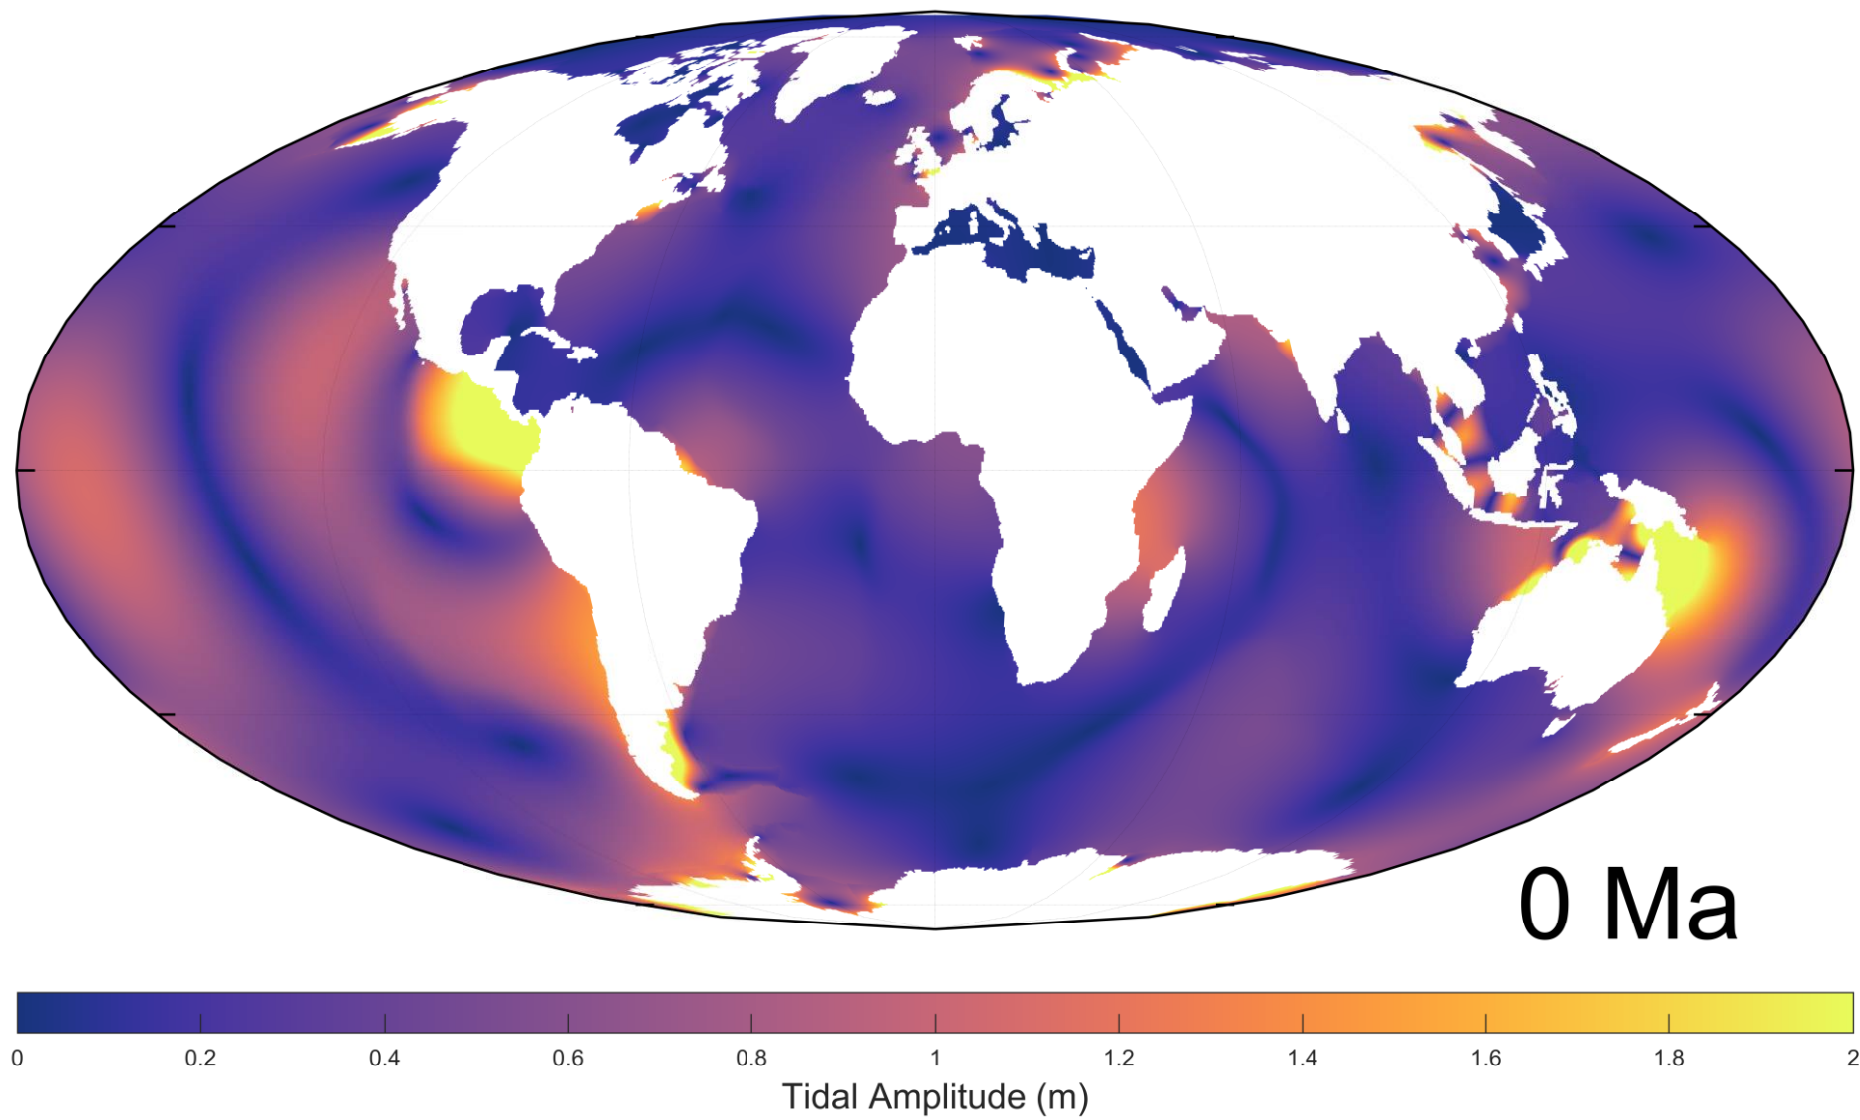

**Figure S4a: Global  $M_2$  amplitudes for the present day (0 Ma) of the Amasia scenario. The colour scale saturates at 2 m.**

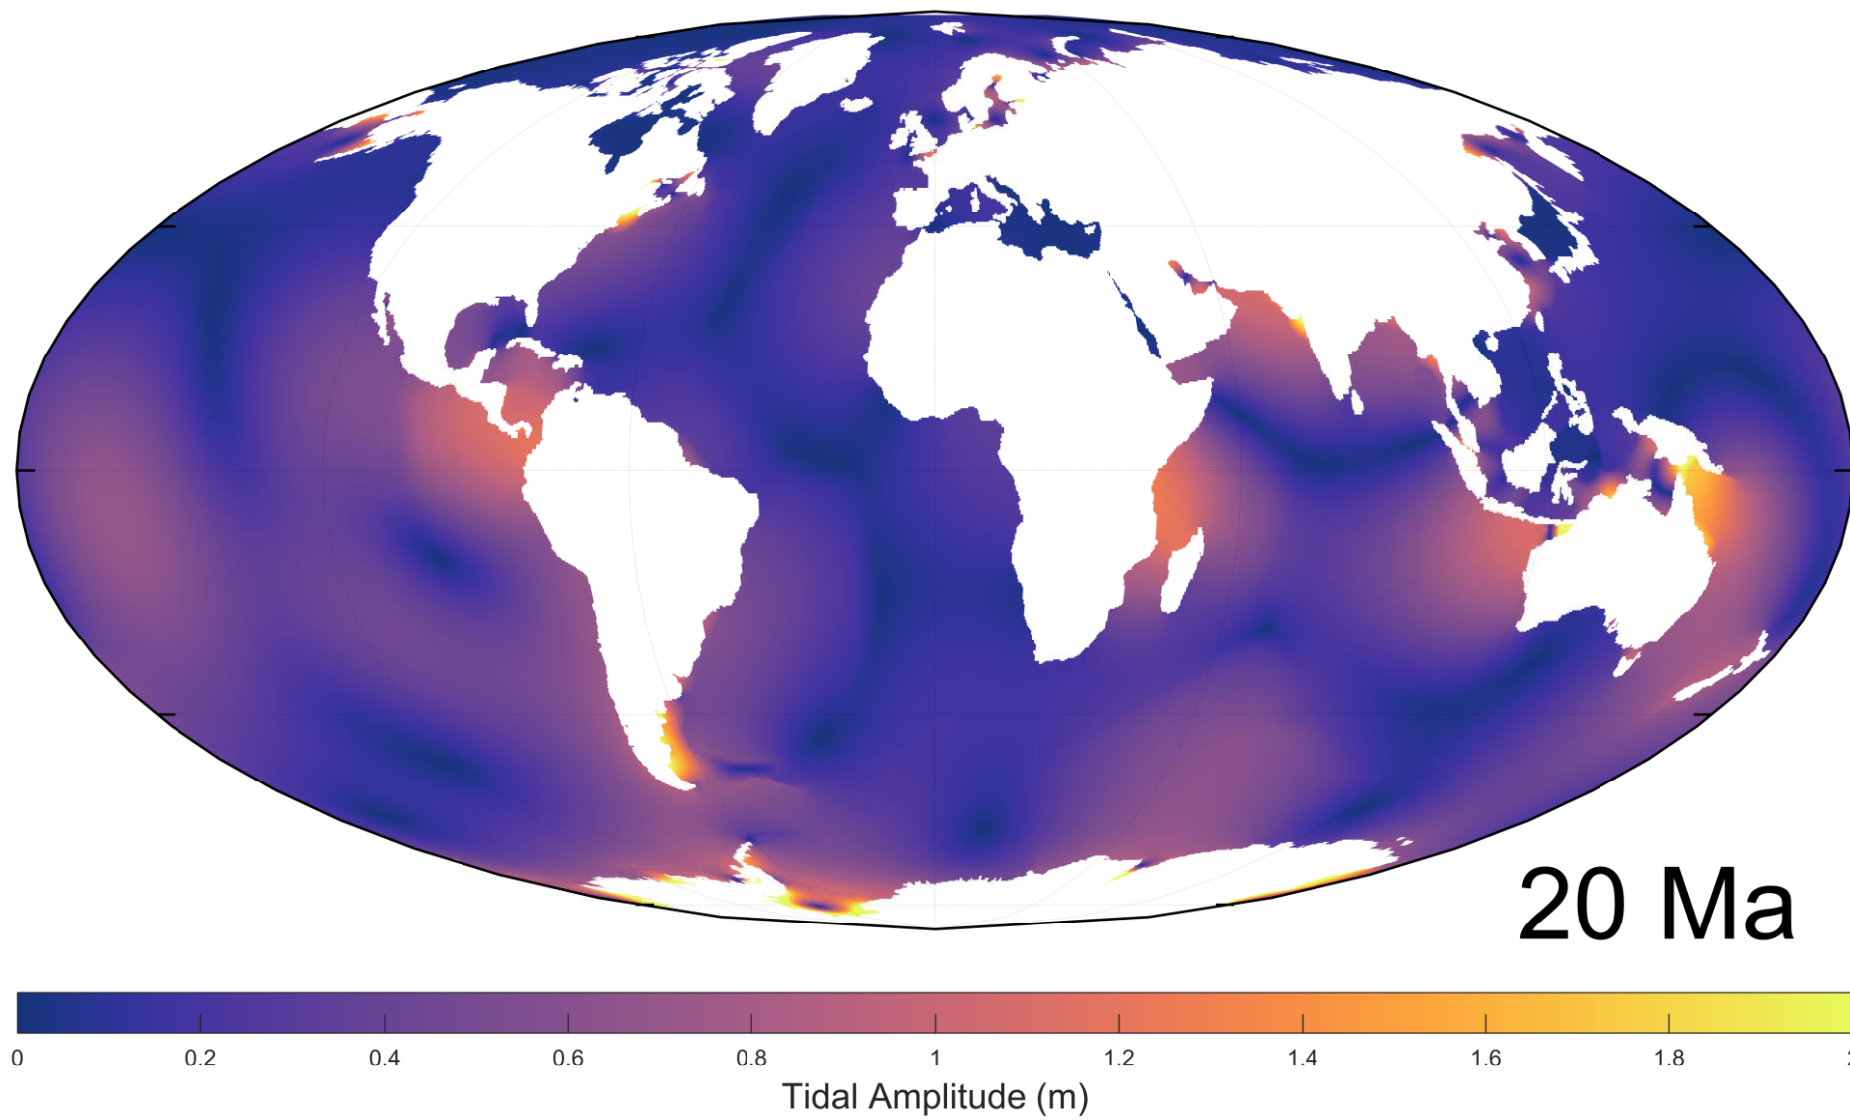

**Figure S4b: Global M<sub>2</sub> amplitudes the Amasia scenario continued.**

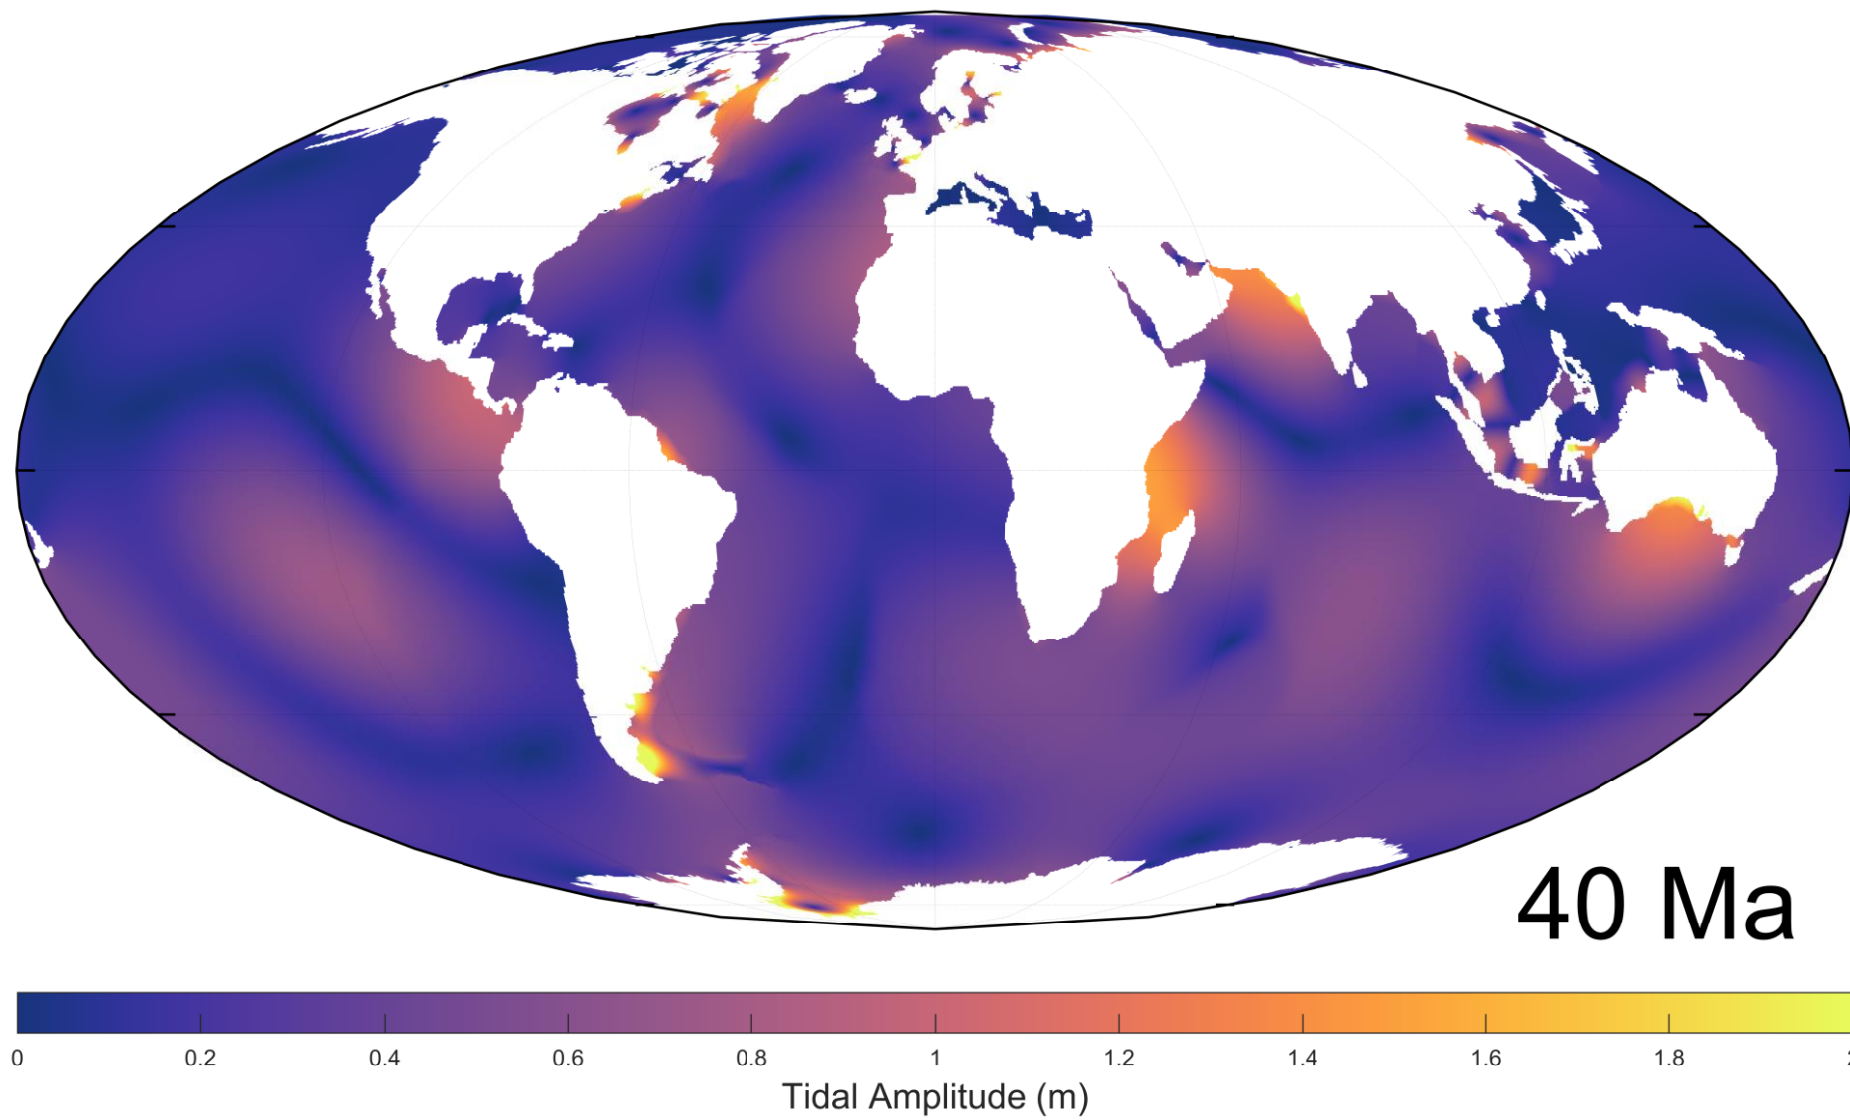

**Figure S4c: Global M<sub>2</sub> amplitudes the Amasia scenario continued.**

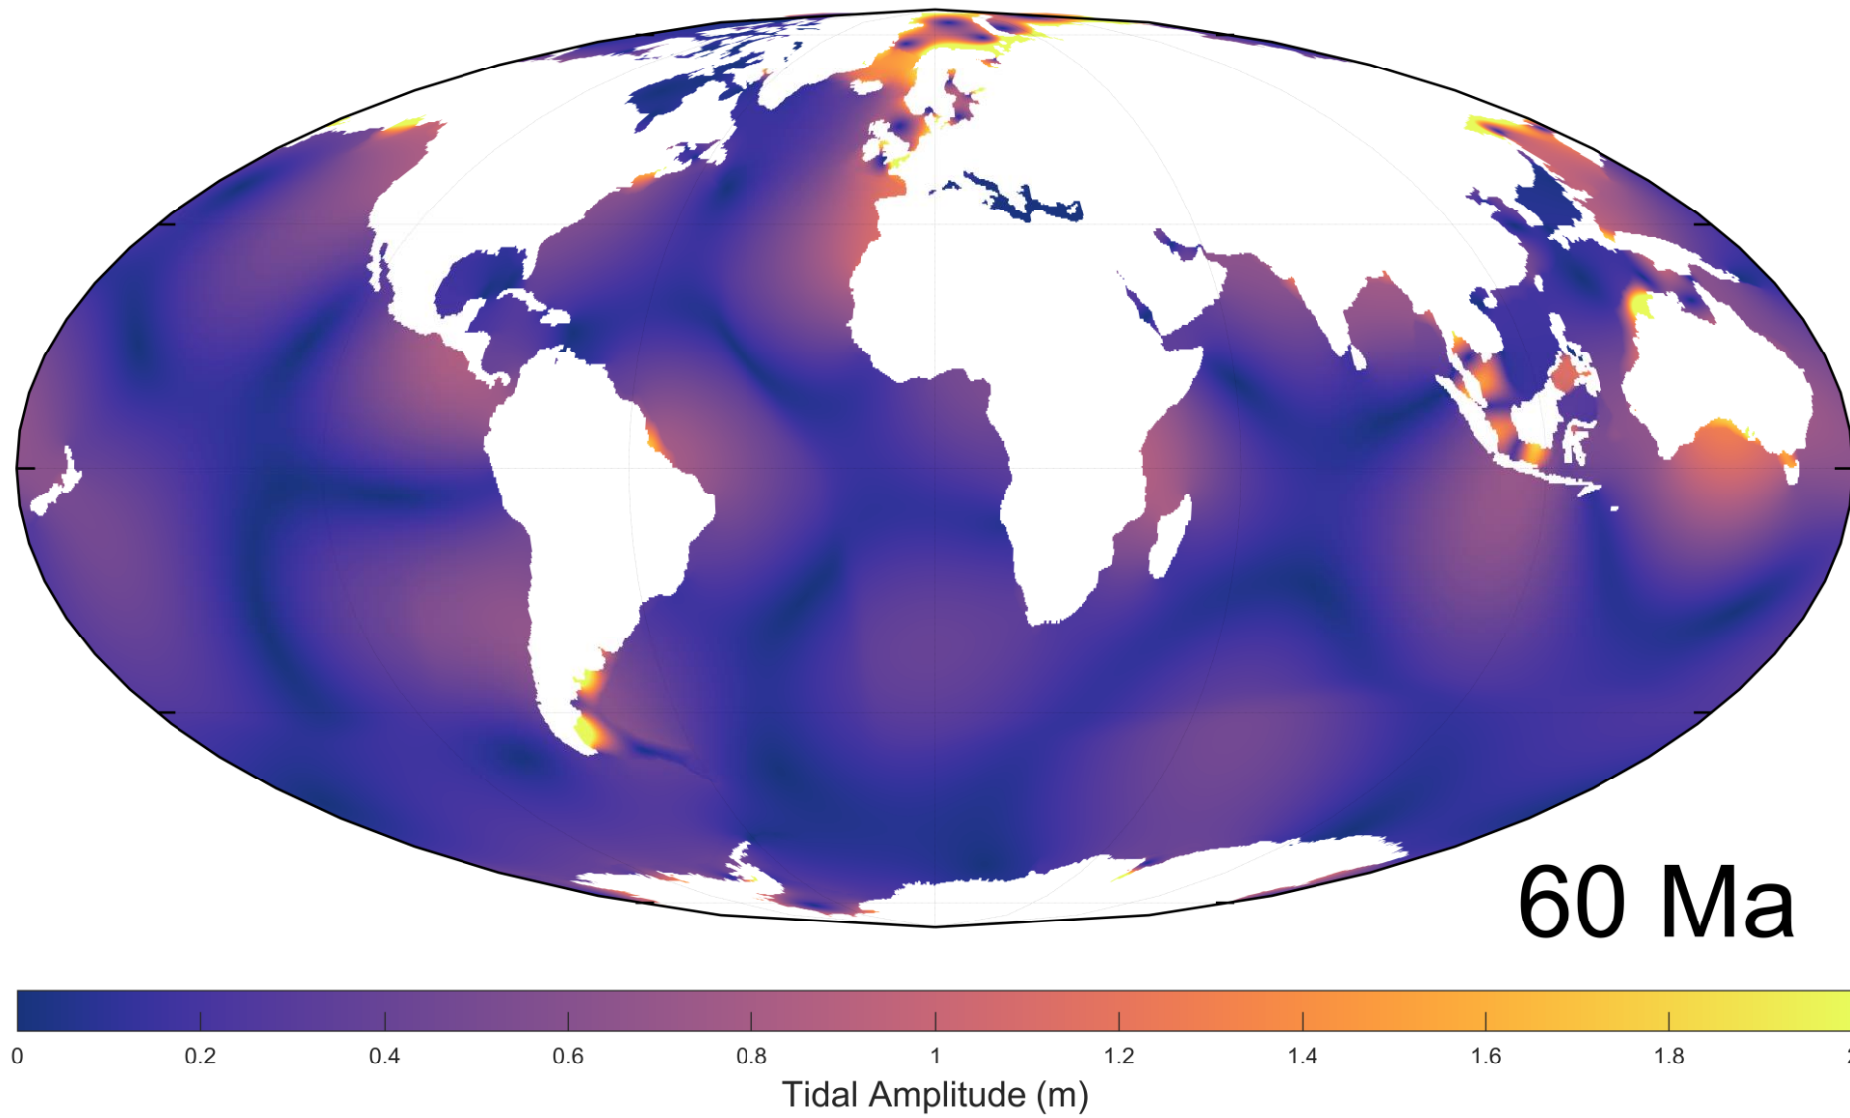

Figure S4d: Global M<sub>2</sub> amplitudes the Amasia scenario continued.

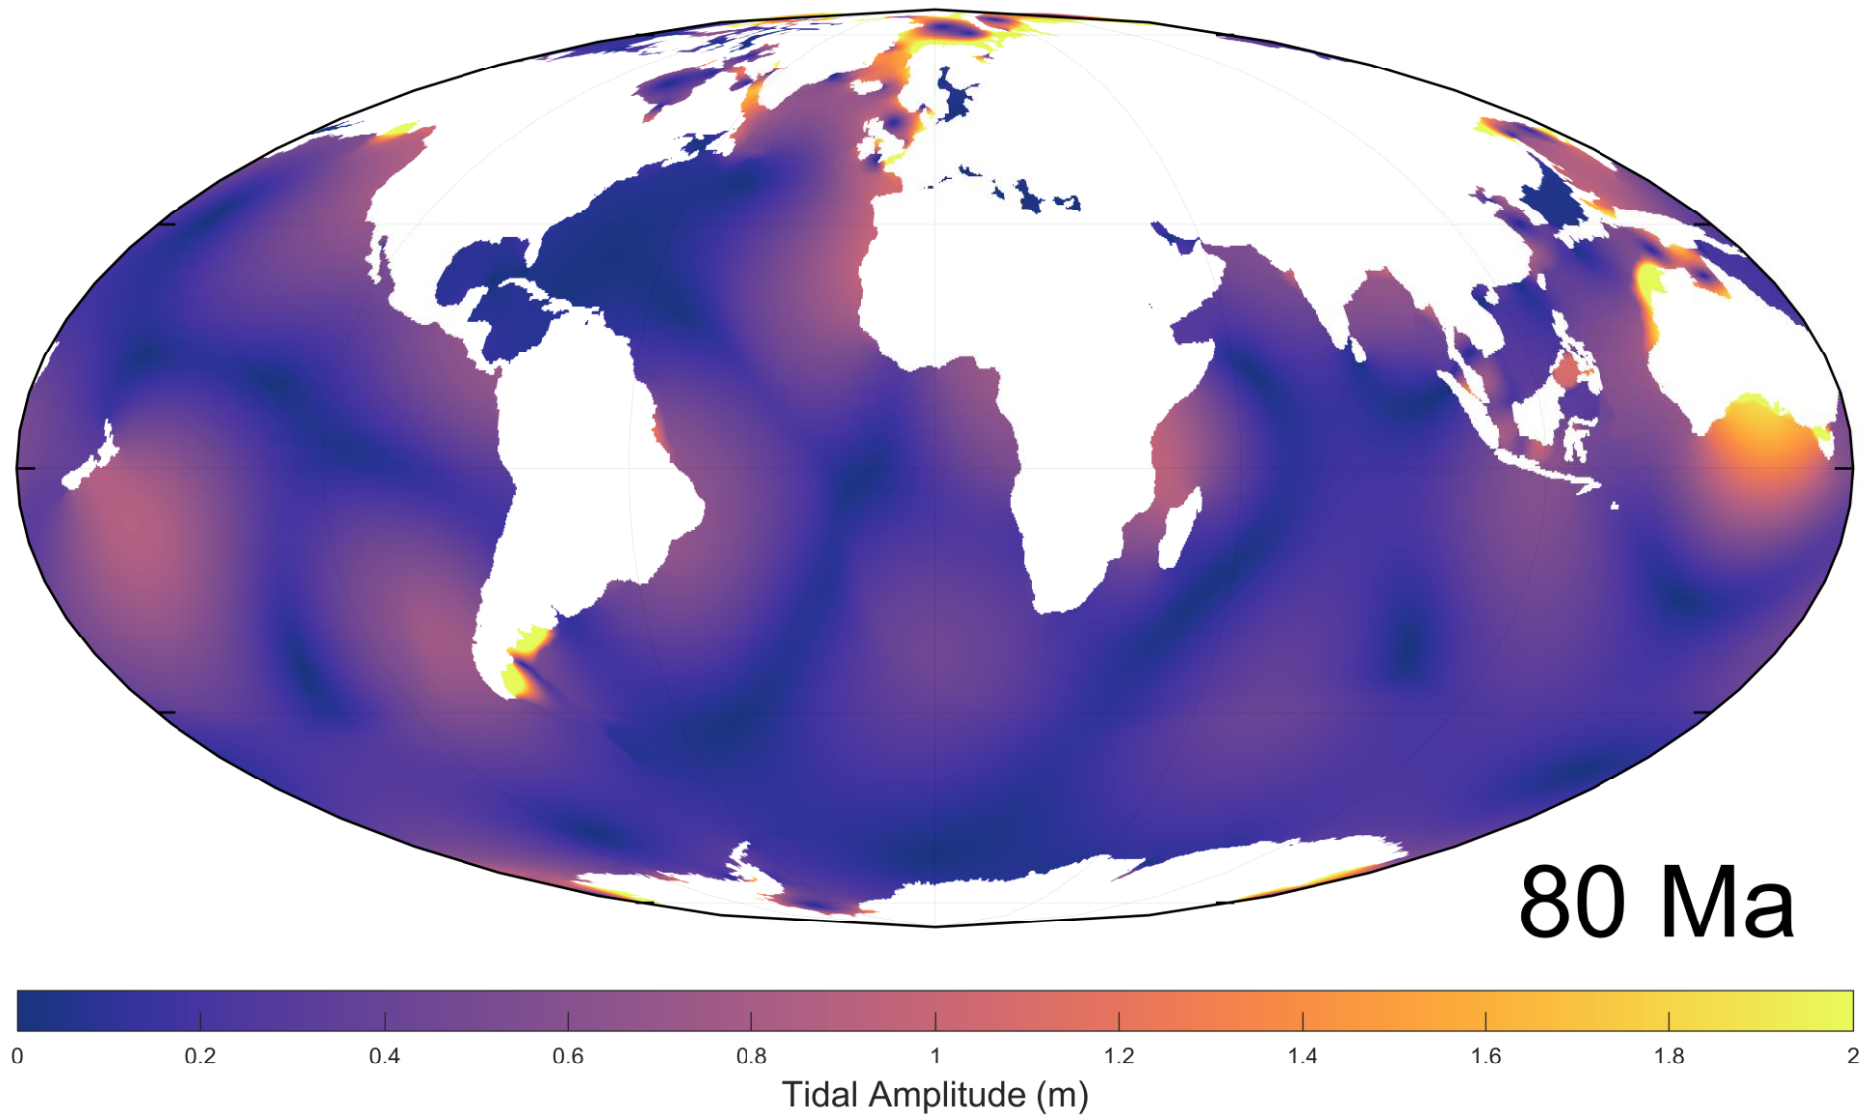

**Figure S4e: Global M<sub>2</sub> amplitudes the Amasia scenario continued.**

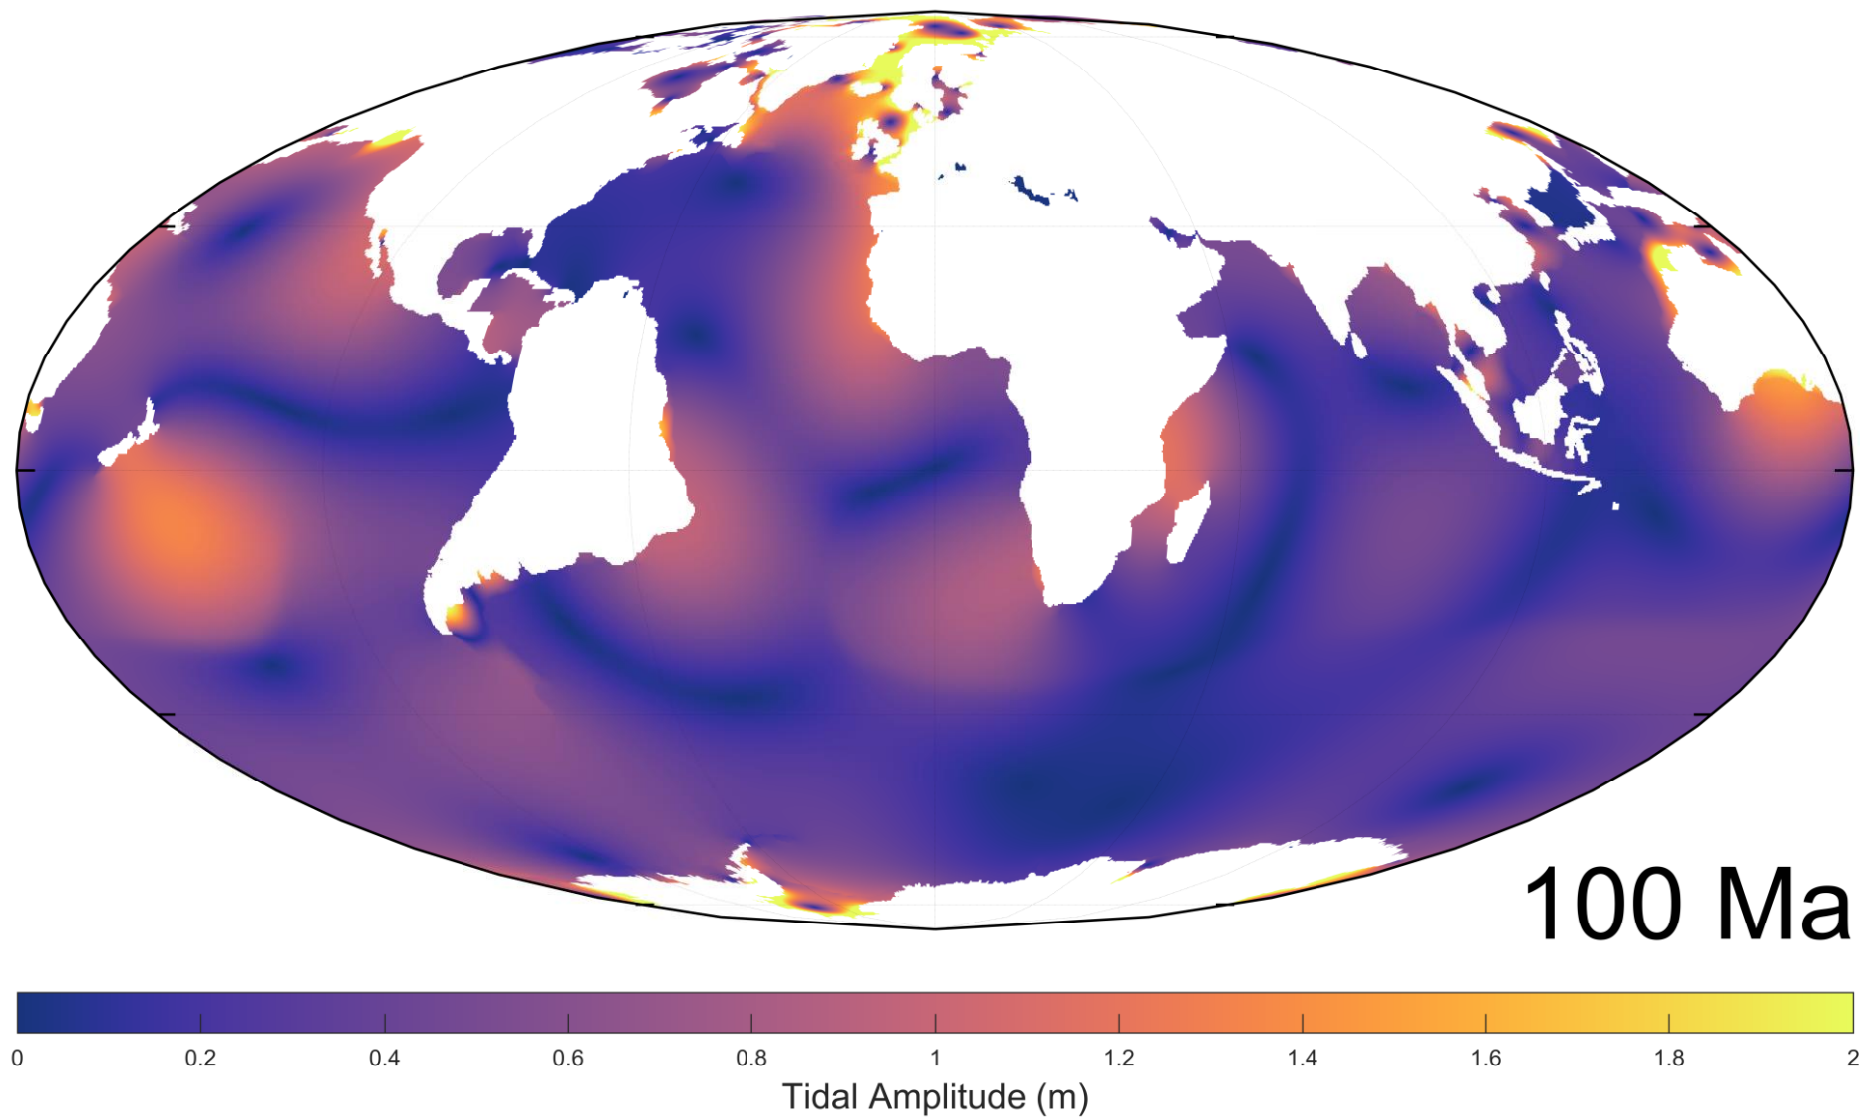

Figure S4f: Global  $M_2$  amplitudes the Amasia scenario continued.

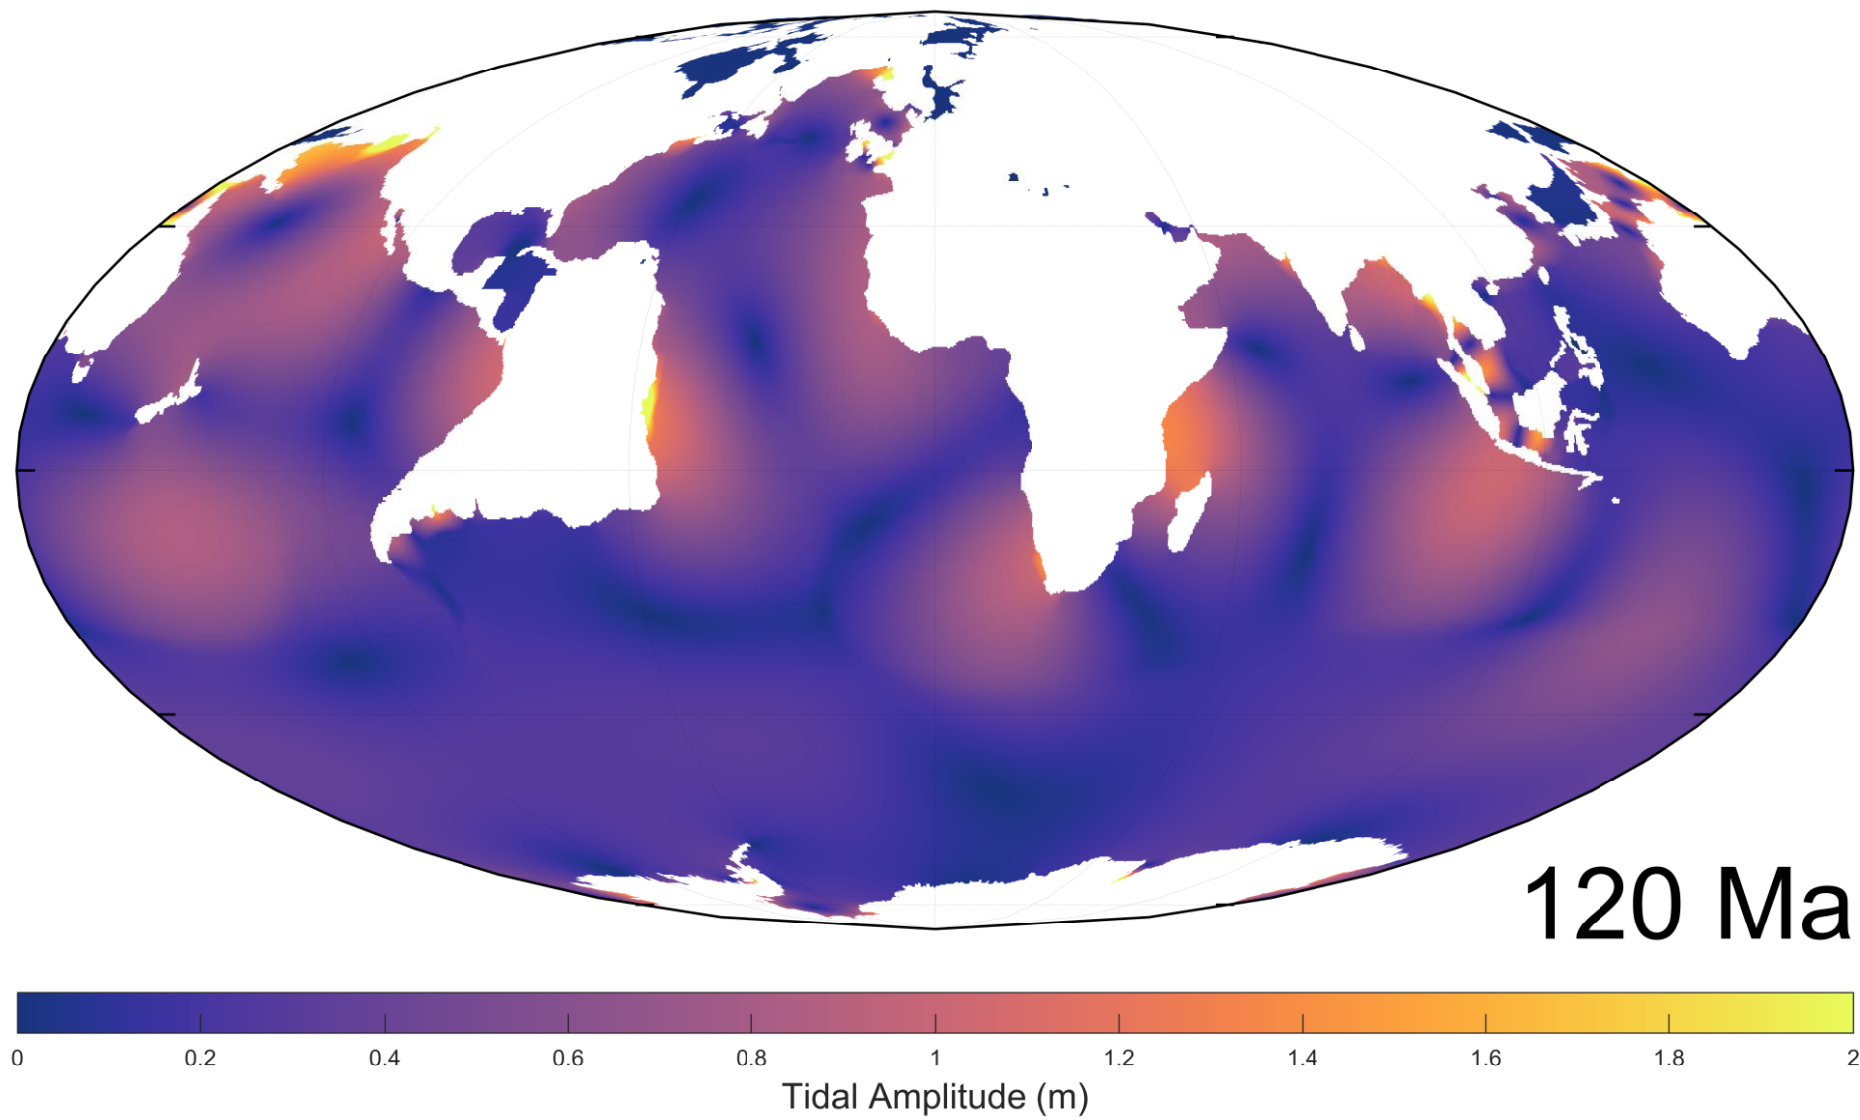

Figure S4g: Global M<sub>2</sub> amplitudes the Amasia scenario continued.

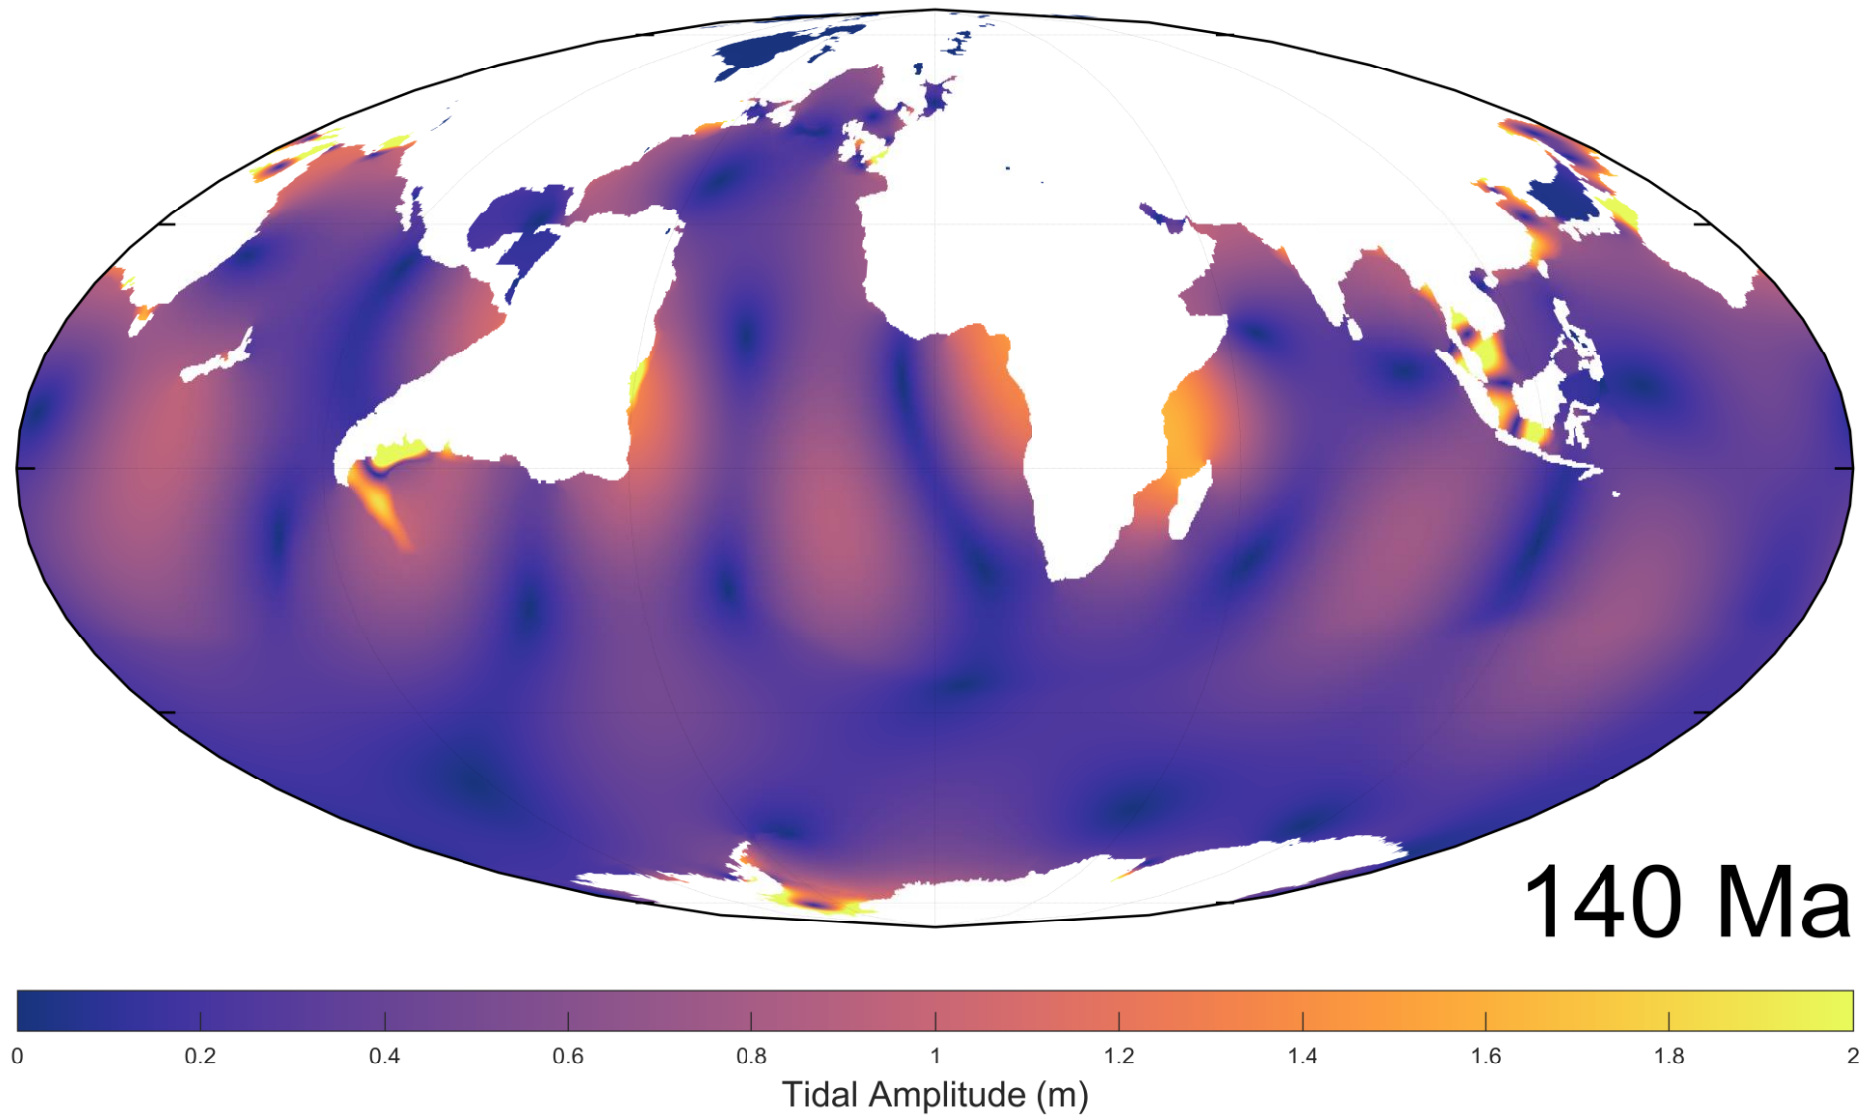

**Figure S4h: Global M<sub>2</sub> amplitudes the Amasia scenario continued.**



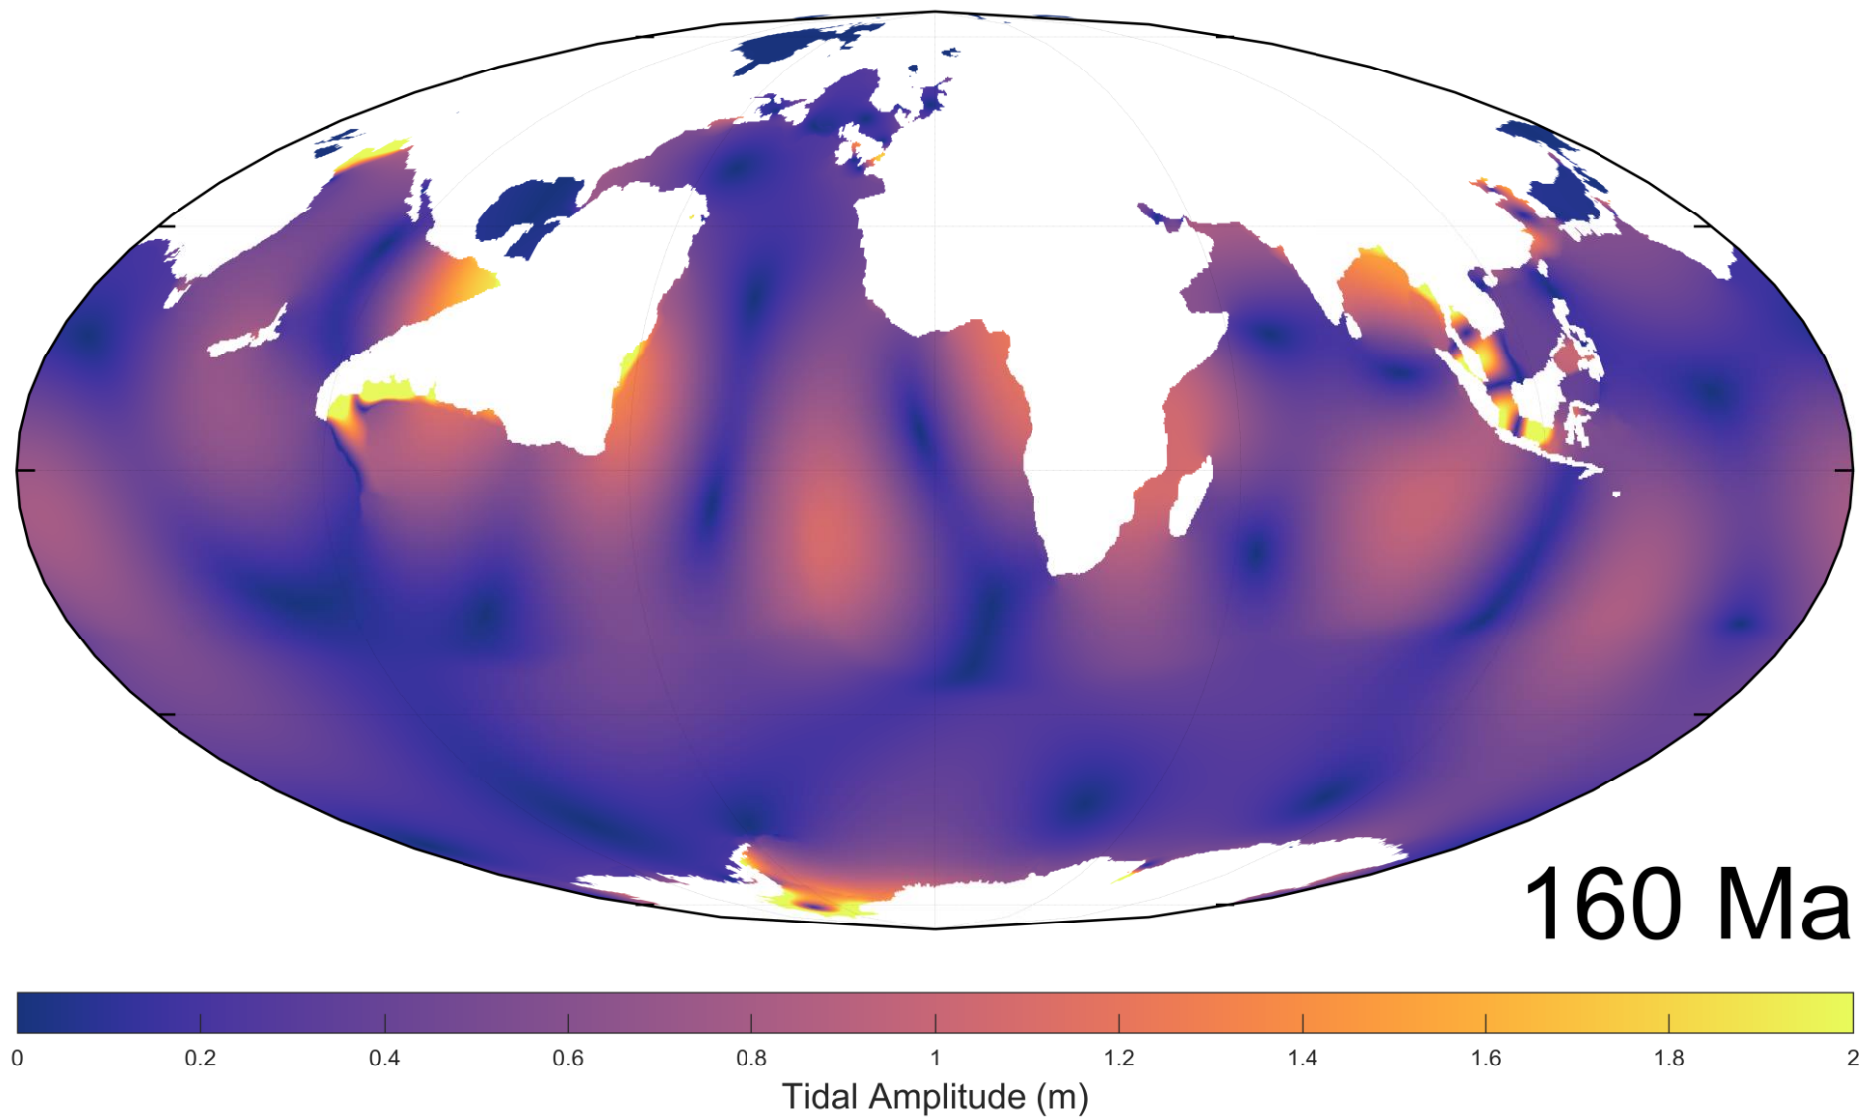

Figure S4i: Global  $M_2$  amplitudes the Amasia scenario continued.

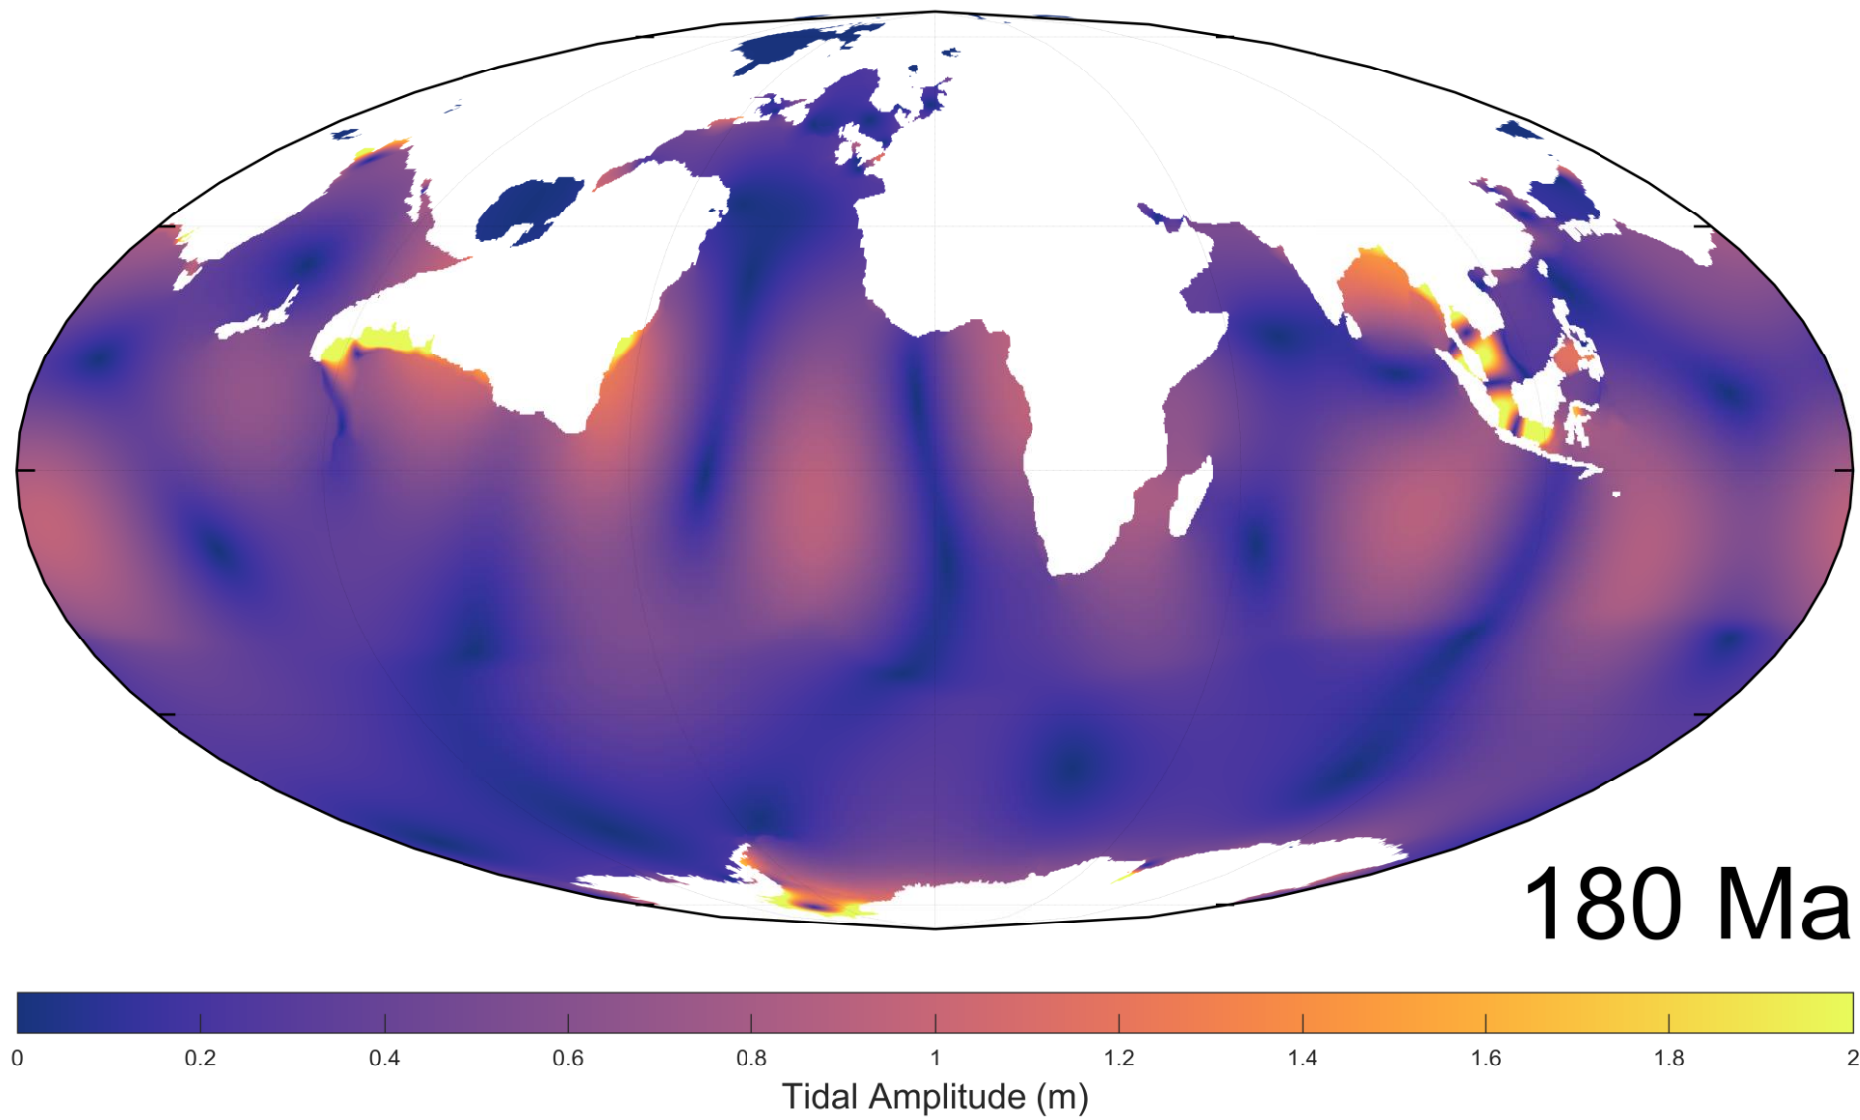

Figure S4j: Global  $M_2$  amplitudes the Amasia scenario continued.

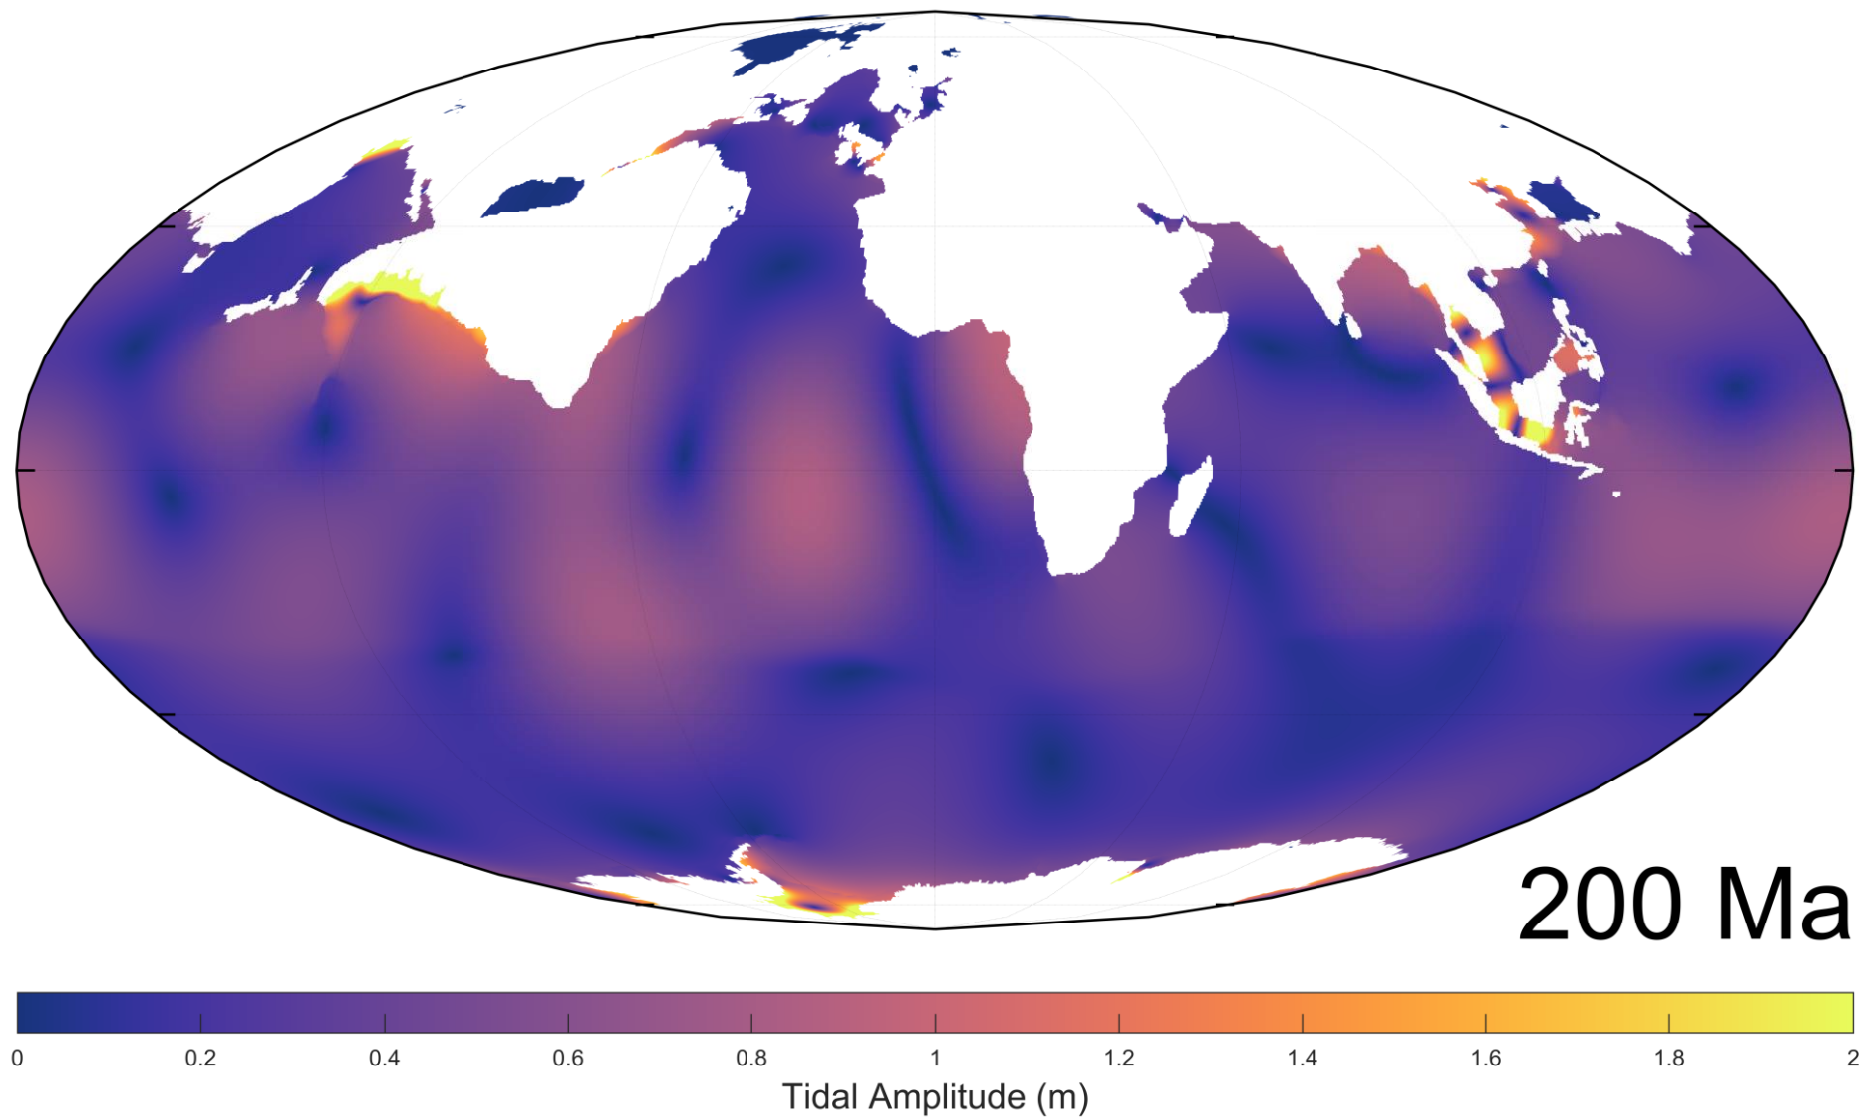

Figure S4k: Global  $M_2$  amplitudes the Amasia scenario continued.
